# Supplementary material
Source: PubMed Central journal article supplement (PMC7443937)
Supplement: pnas.1922248117.sapp.pdf [file pnas.1922248117.sapp.pdf]

# Geometric renormalization unravels self-similarity of the multiscale human connectome

Muhua Zheng,<sup>1,2</sup> Antoine Allard,<sup>3,4</sup> Patric Hagmann,<sup>5</sup>  
Yasser Alemán-Gómez,<sup>5,6,7</sup> and M. Ángeles Serrano<sup>1,2,8</sup>

<sup>1</sup>*Departament de Física de la Matèria Condensada,  
Universitat de Barcelona, Martí i Franquès 1, E-08028 Barcelona, Spain*

<sup>2</sup>*Universitat de Barcelona Institute of Complex Systems (UBICS),  
Universitat de Barcelona, Barcelona, Spain*

<sup>3</sup>*Département de physique, de génie physique et d'optique,  
Université Laval, Québec, Canada G1V 0A6*

<sup>4</sup>*Centre interdisciplinaire de modélisation mathématique,  
Université Laval, Québec, Canada G1V 0A6*

<sup>5</sup>*Department of Radiology, Centre Hospitalier Universitaire Vaudois  
(CHUV) and University of Lausanne (UNIL), Lausanne, Switzerland*

<sup>6</sup>*Center for Psychiatric Neuroscience, Department of Psychiatry,  
Centre Hospitalier Universitaire Vaudois (CHUV) and  
University of Lausanne (UNIL), Prilly, Switzerland*

<sup>7</sup>*Medical Image Analysis Laboratory (MIAL),  
Centre d'Imagerie BioMédicale (CIBM), Lausanne, Switzerland*

<sup>8</sup>*ICREA, Passeig Lluís Companys 23, E-08010 Barcelona, Spain*

(Dated: June 27, 2020)

## CONTENTS

|                                                                                |    |
|--------------------------------------------------------------------------------|----|
| I. Results for UL dataset                                                      | 3  |
| A. Parcellation and distribution of areas                                      | 3  |
| B. Average fiber length at different resolutions                               | 4  |
| C. MH connectomes vs GR flows for all subjects                                 | 5  |
| D. Behavior of the connection probabilities                                    | 14 |
| E. Navigability on the independent MH connectome layers and GR shell           | 17 |
| F. Multiscale navigation protocol.                                             | 18 |
| G. Network properties of null models                                           | 21 |
| II. Cross-validating results in the HCP dataset                                | 23 |
| III. Comparison of similarity distances with Euclidean distances and homophily | 41 |
| IV. Statistics for subjects in the UL and the HCP datasets                     | 42 |
| References                                                                     | 55 |

# I. RESULTS FOR UL DATASET

## A. Parcellation and distribution of areas

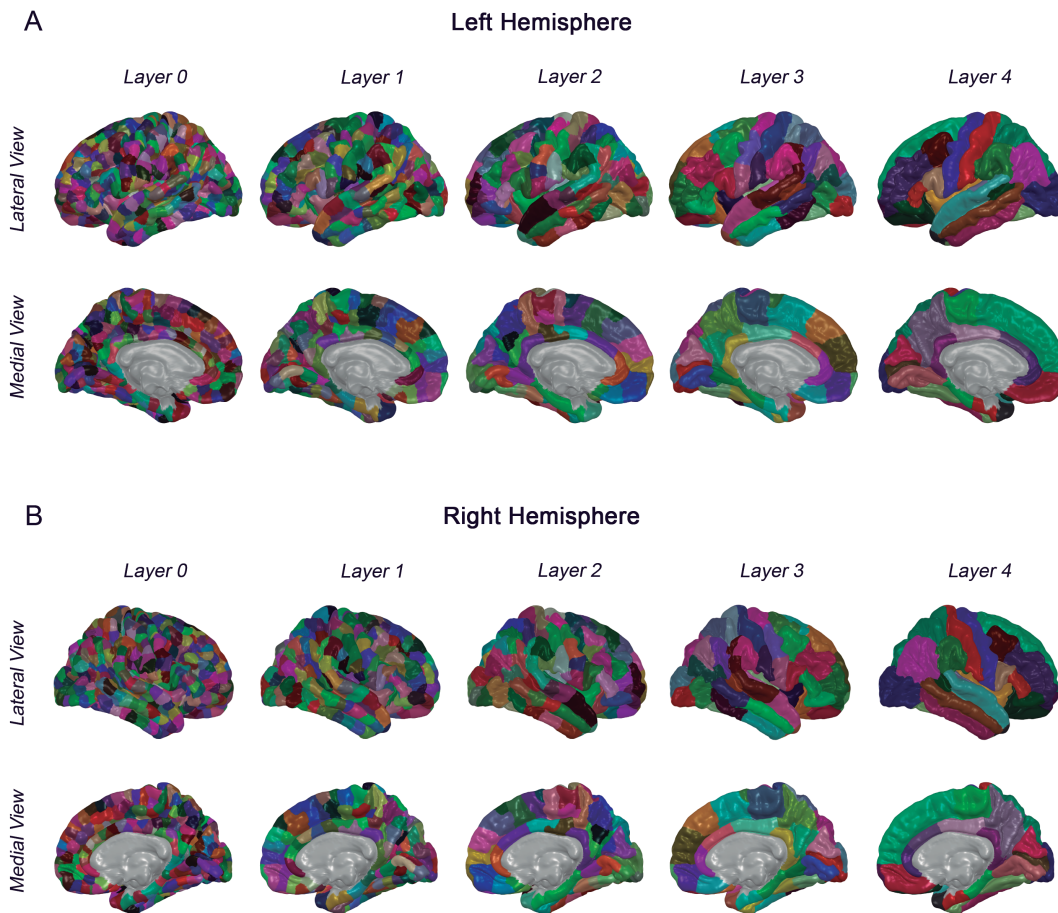

FIG. S1. Lateral and medial views of the multi-scale cortical parcellation.

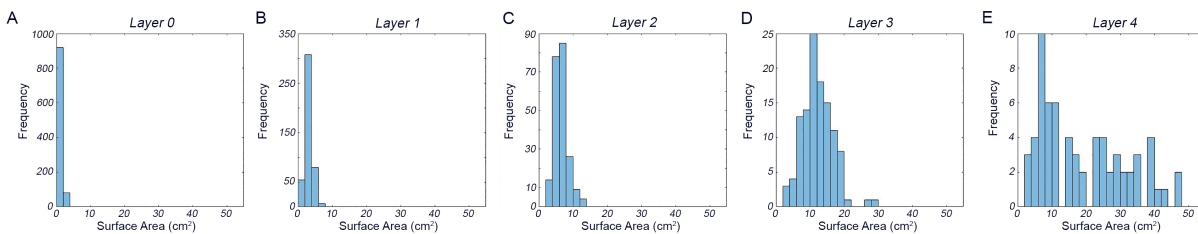

FIG. S2. Histograms of surface areas of regions at each connectome scale.

## B. Average fiber length at different resolutions

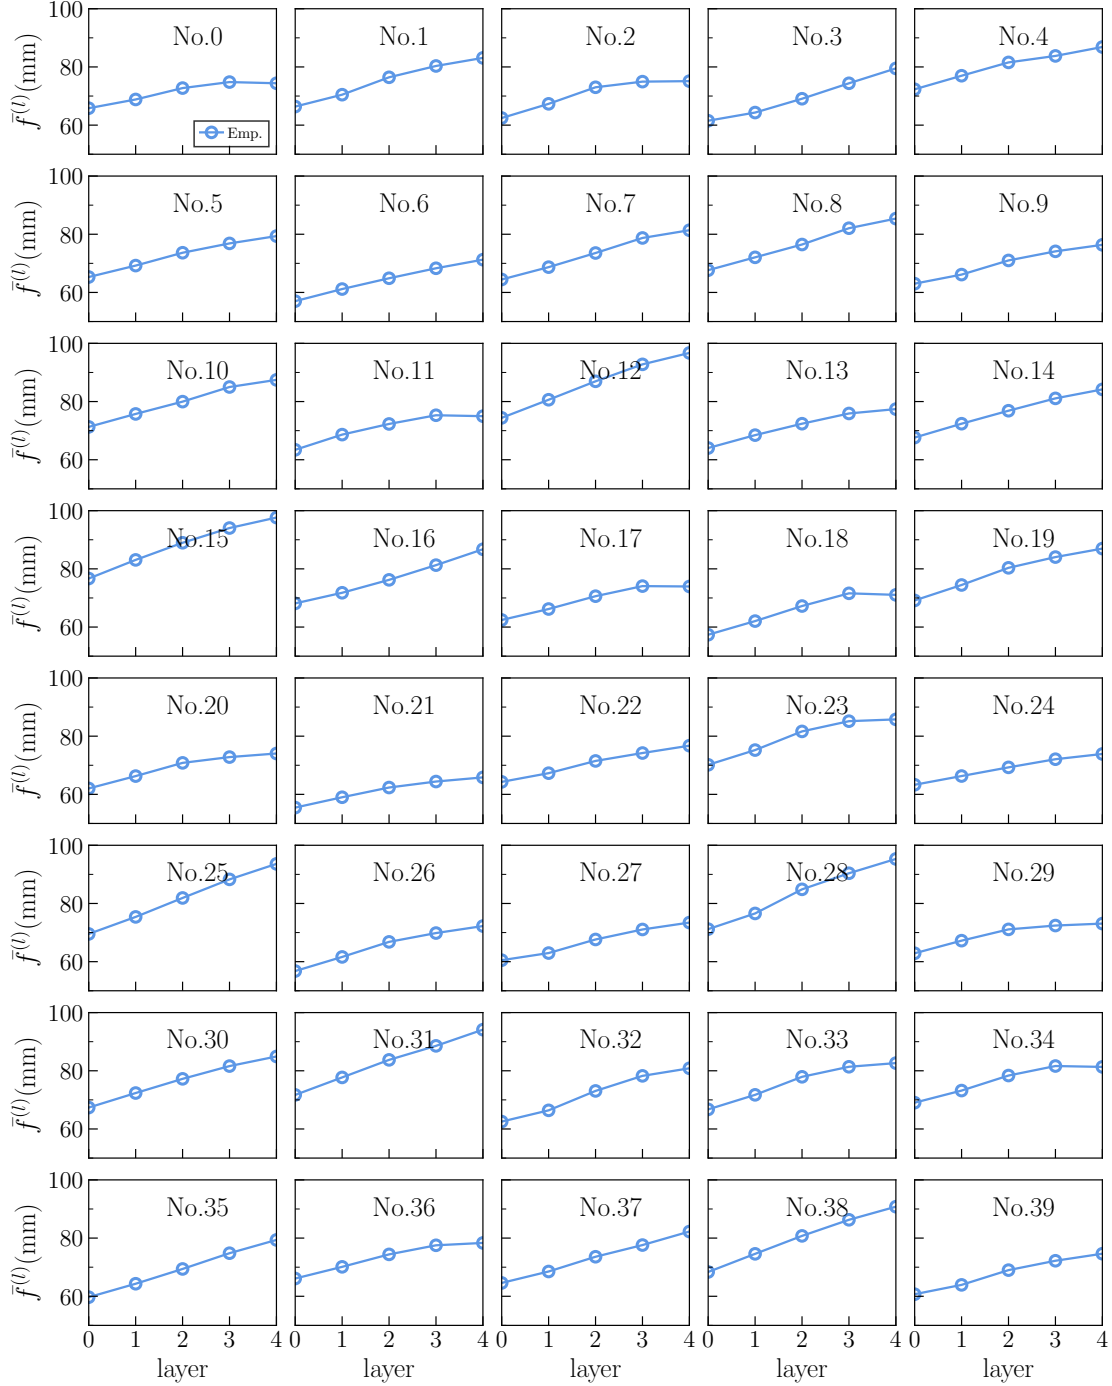

FIG. S3. Average fiber length  $\bar{f}^{(l)}$  (mm) for each subject in UL dataset.



### C. MH connectomes vs GR flows for all subjects

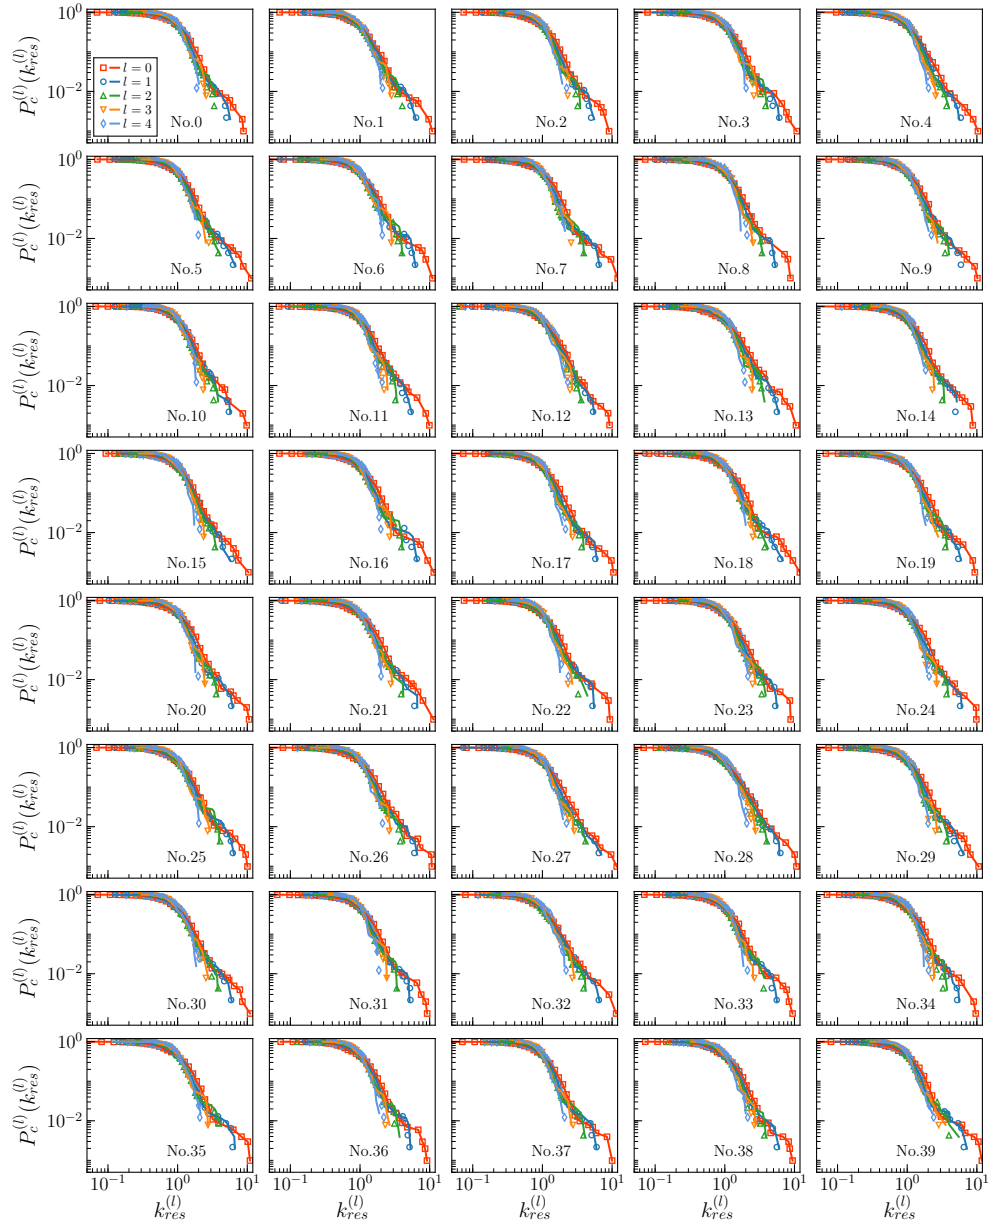

FIG. S4. Complementary cumulative degree distribution  $P_c^{(l)}(k_{res}^{(l)})$  of rescaled degrees  $k_{res}^{(l)}$  for different layers  $l$  in each subject as compared to the multiscale GR unfolding, where the symbols correspond to the empirical multiscale connectome and the line to the GR flow.

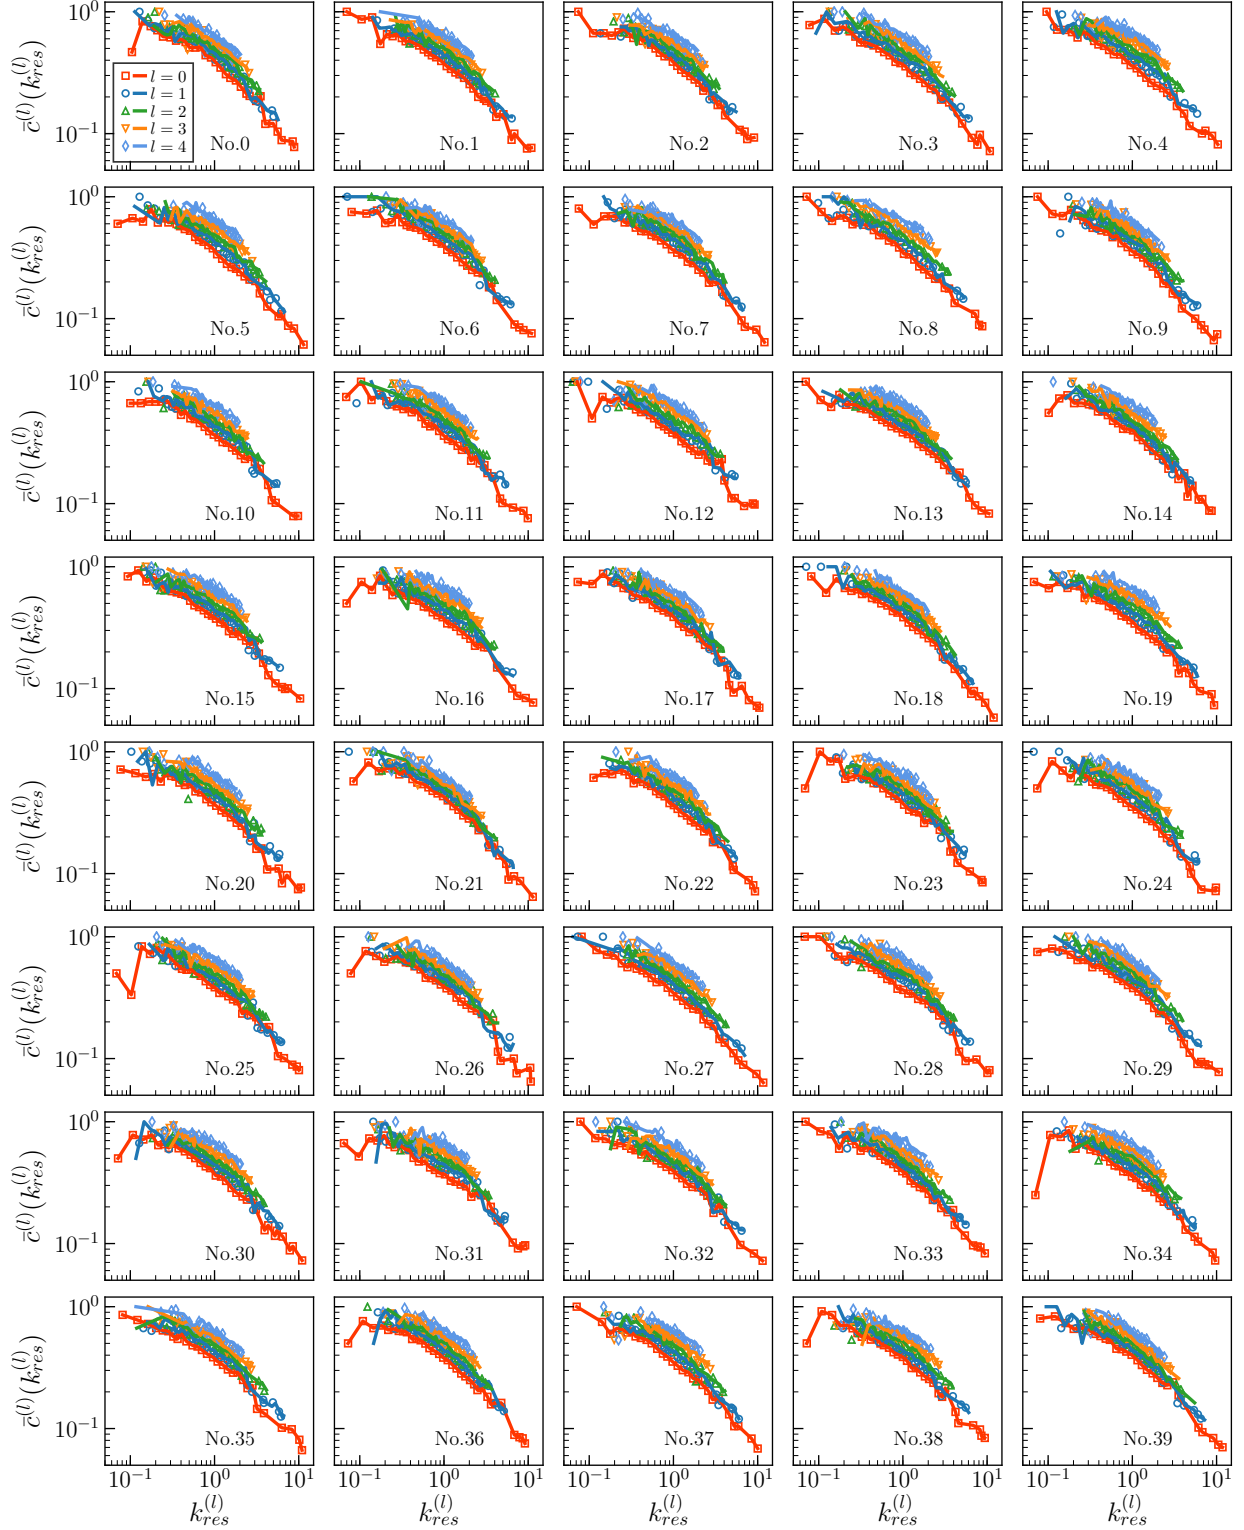

FIG. S5. The degree-dependent clustering coefficient  $\bar{c}^{(l)}(k_{res}^{(l)})$  of rescaled degrees  $k_{res}^{(l)}$  for different layers  $l$  in each subject as compared to the multiscale GR shell, where the symbols correspond to the empirical multiscale connectome and the line to the GR flow.

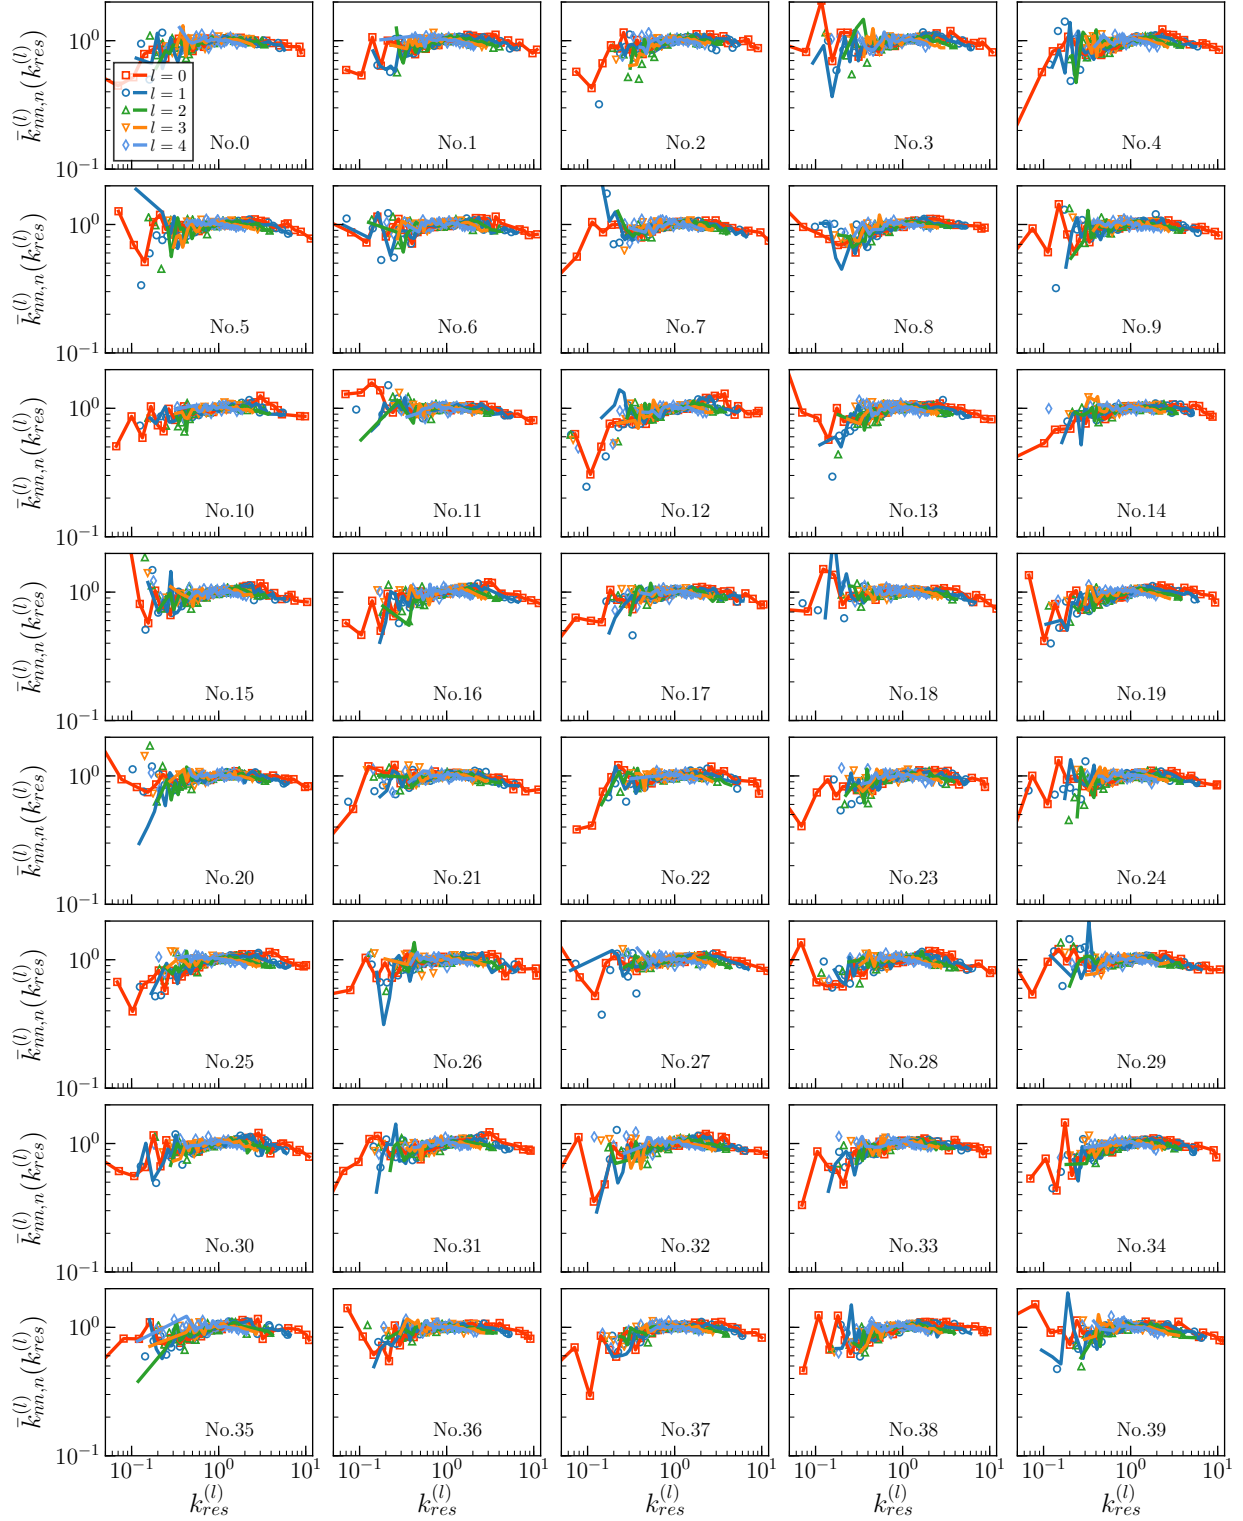

FIG. S6. Normalized average nearest-neighbour degree  $\bar{k}_{nn,n}^{(l)}(k_{res}^{(l)}) = \bar{k}_{nn}(k_{res}^{(l)})\langle k^{(l)} \rangle / \langle (k^{(l)})^2 \rangle$  versus rescaled degrees  $k_{res}^{(l)}$  for different layers  $l$  in each subject as compared to the multiscale GR unfolding, where the symbols correspond to the empirical multiscale connectome and the line to the GR flow.

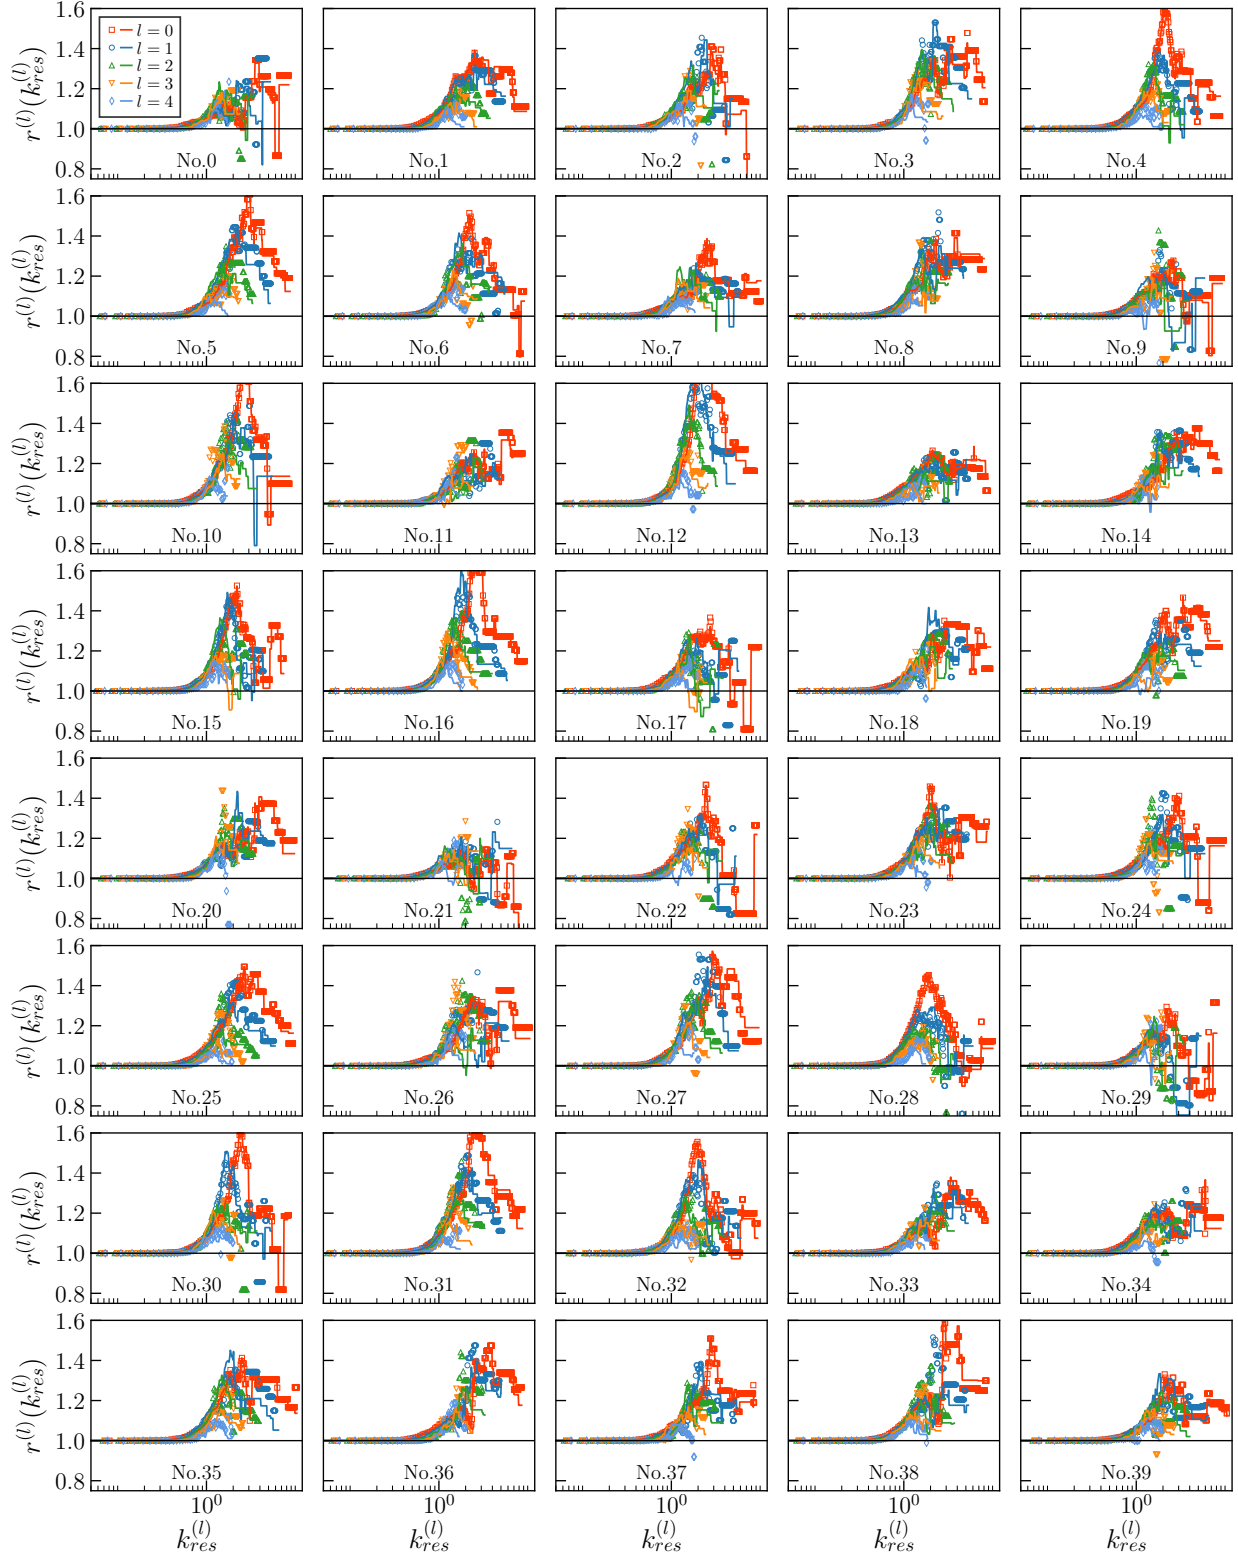

FIG. S7. Rich club coefficient  $r^{(l)}(k_{res}^{(l)})$  versus rescaled degrees  $k_{res}^{(l)}$  for different layers  $l$  in each subject as compared to the multiscale GR unfolding, where the symbols correspond to the empirical multiscale connectome and the line to the GR flow. The two largest hubs in subjects 2 and 21 are disconnected, giving two outlier values 0.

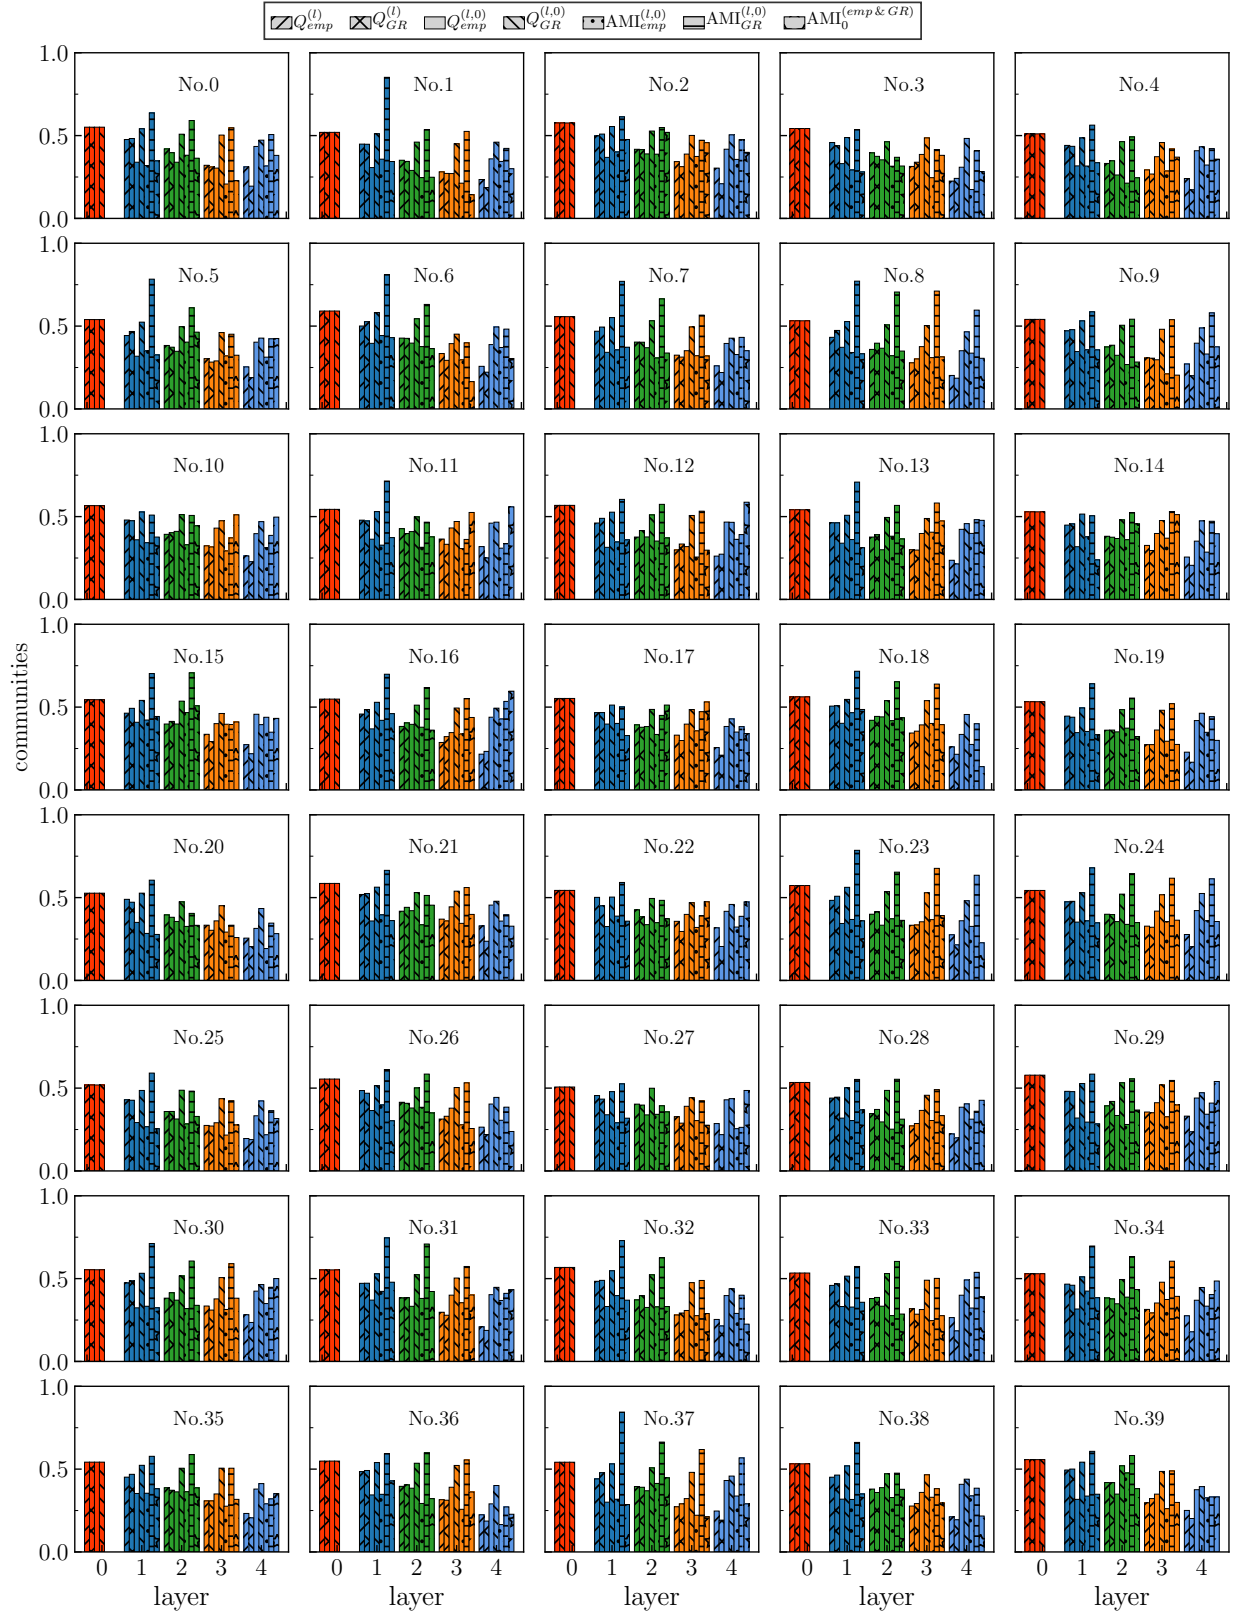

FIG. S8. Community structure of the empirical multiscale connectomes and the GR unfolding.

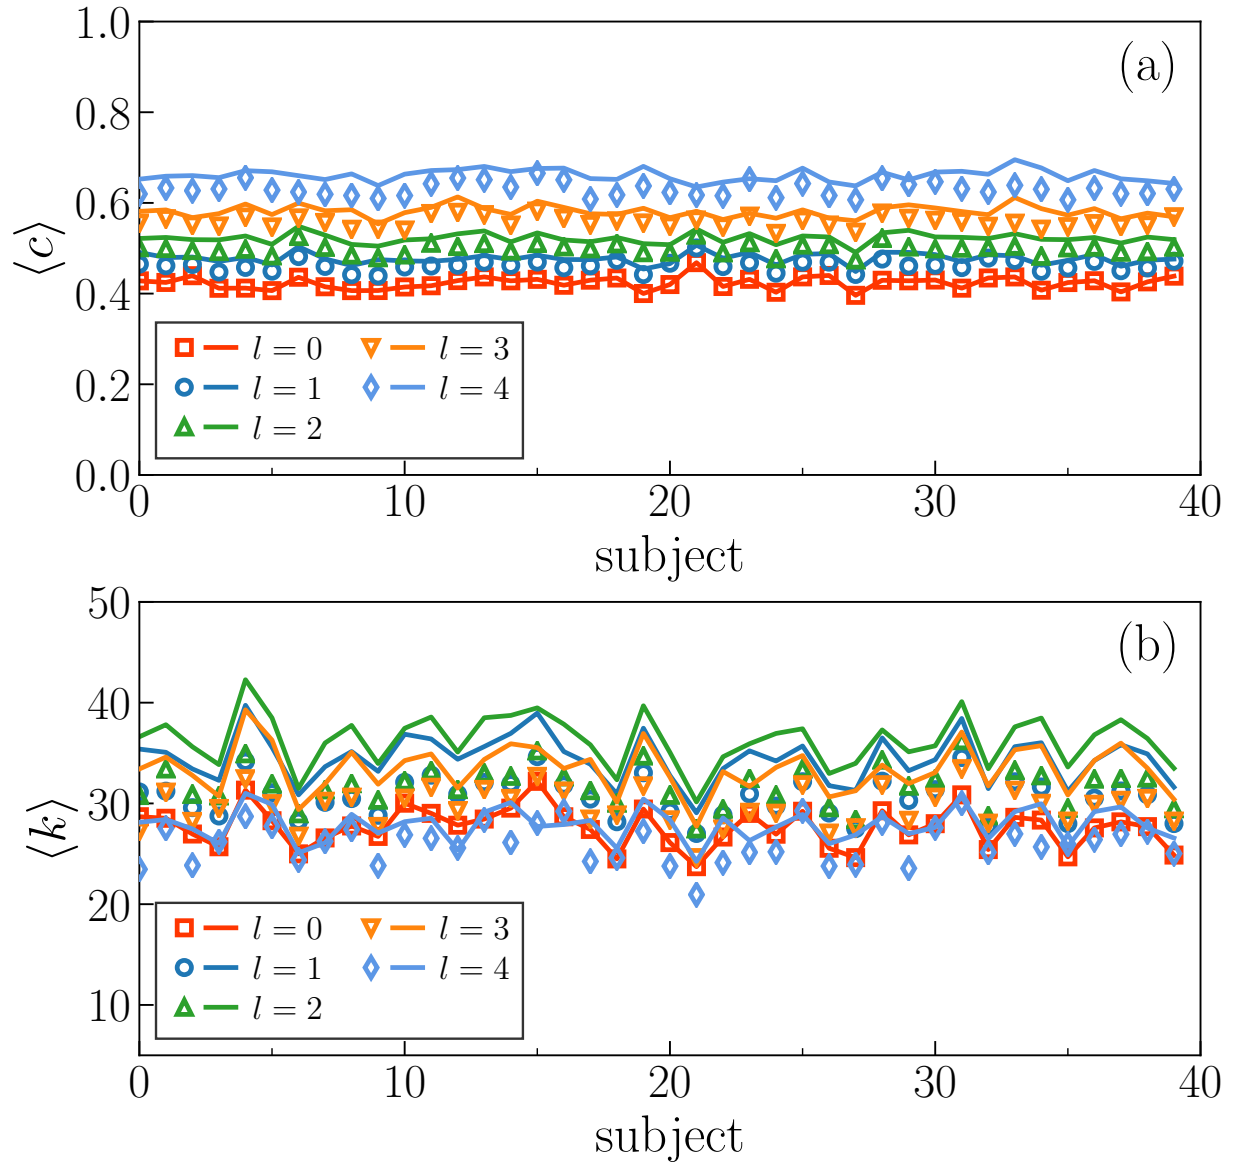

FIG. S9. Average clustering coefficient and mean degree for all the layers in each subject as compared to the multiscale GR unfolding, where the symbols correspond to the empirical multiscale connectome and the lines to the GR flow.

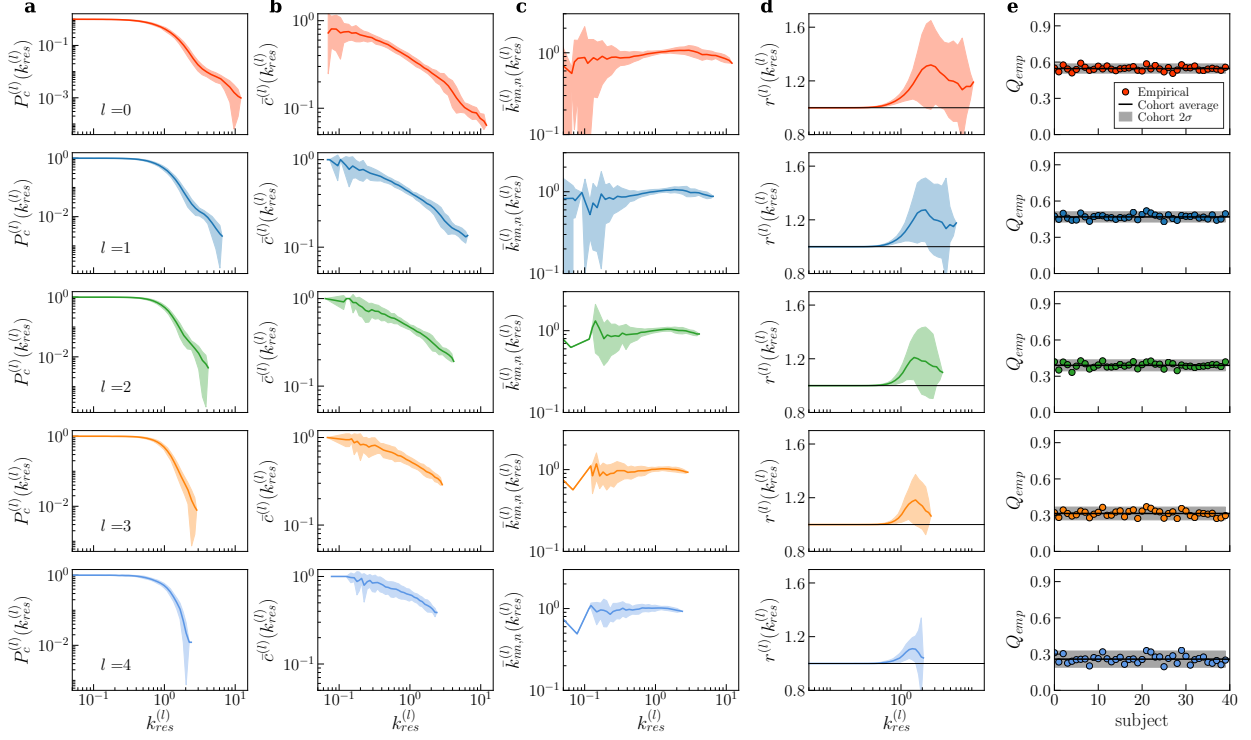

FIG. S10. **Network properties across 40 subjects for all layers in the UL dataset.** Each column shows the complementary cumulative degree distribution, degree-dependent clustering coefficient, degree-degree correlations, rich club coefficient and modularity. The degrees have been rescaled by the internal average degree of the corresponding layer  $k_{res}^{(l)} = k^{(l)} / \langle k^{(l)} \rangle$ . The solid lines show the corresponding average values across 40 subjects in the cohort and the shadows indicate  $2\sigma$  deviations.

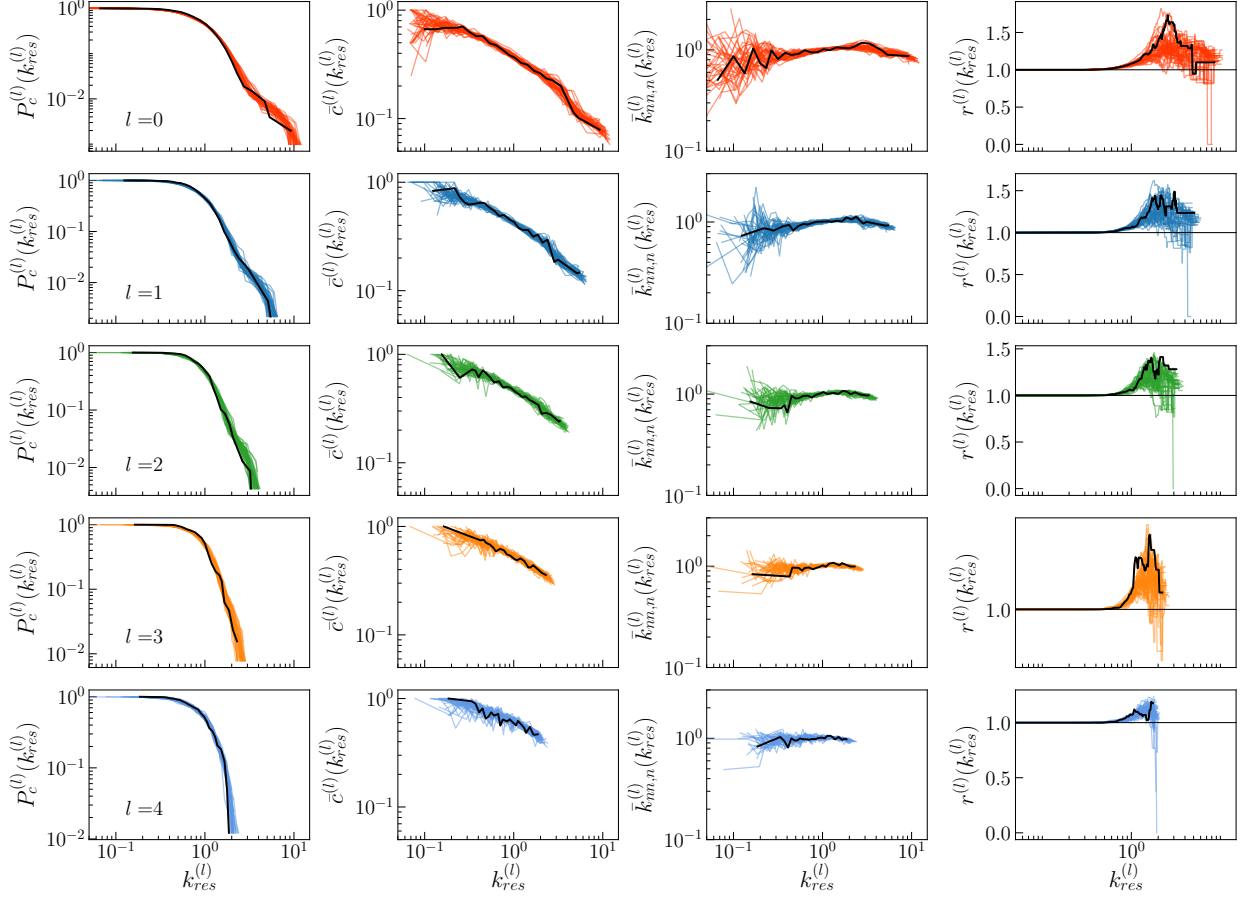

FIG. S11. **Subject No. 10 is a typical subject in the UL dataset.** Each column shows the complementary cumulative degree distribution, degree dependent clustering coefficient, degree-degree correlations and rich club coefficient. The degrees have been rescaled by the internal average degree of the corresponding layer  $k_{res}^{(l)} = k^{(l)}/\langle k^{(l)} \rangle$ . Different lines correspond to different subject in each cohort. The results for subject No. 10 have been highlighted in black color.



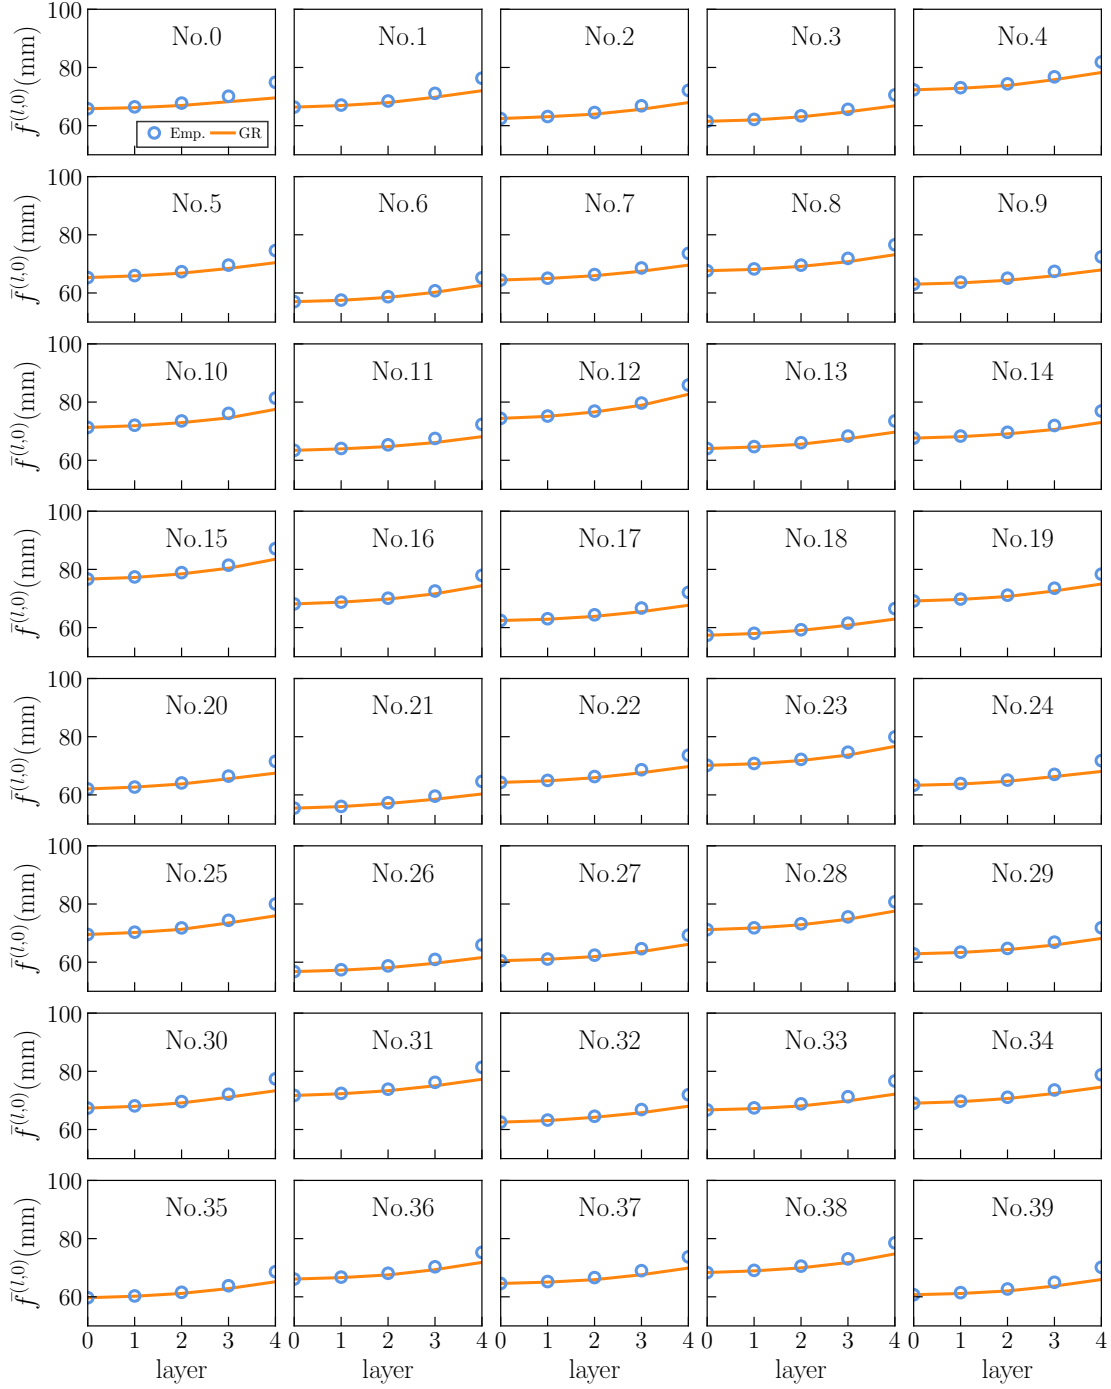

FIG. S12. Average fiber length  $\bar{f}^{(l,0)}$  in layer 0 of links outside supernodes in layer  $l$ , where supernodes are defined by the anatomical coarse-graining in the empirical curve (symbols) or the similarity coarse-graining in the GR case (lines).

## D. Behavior of the connection probabilities

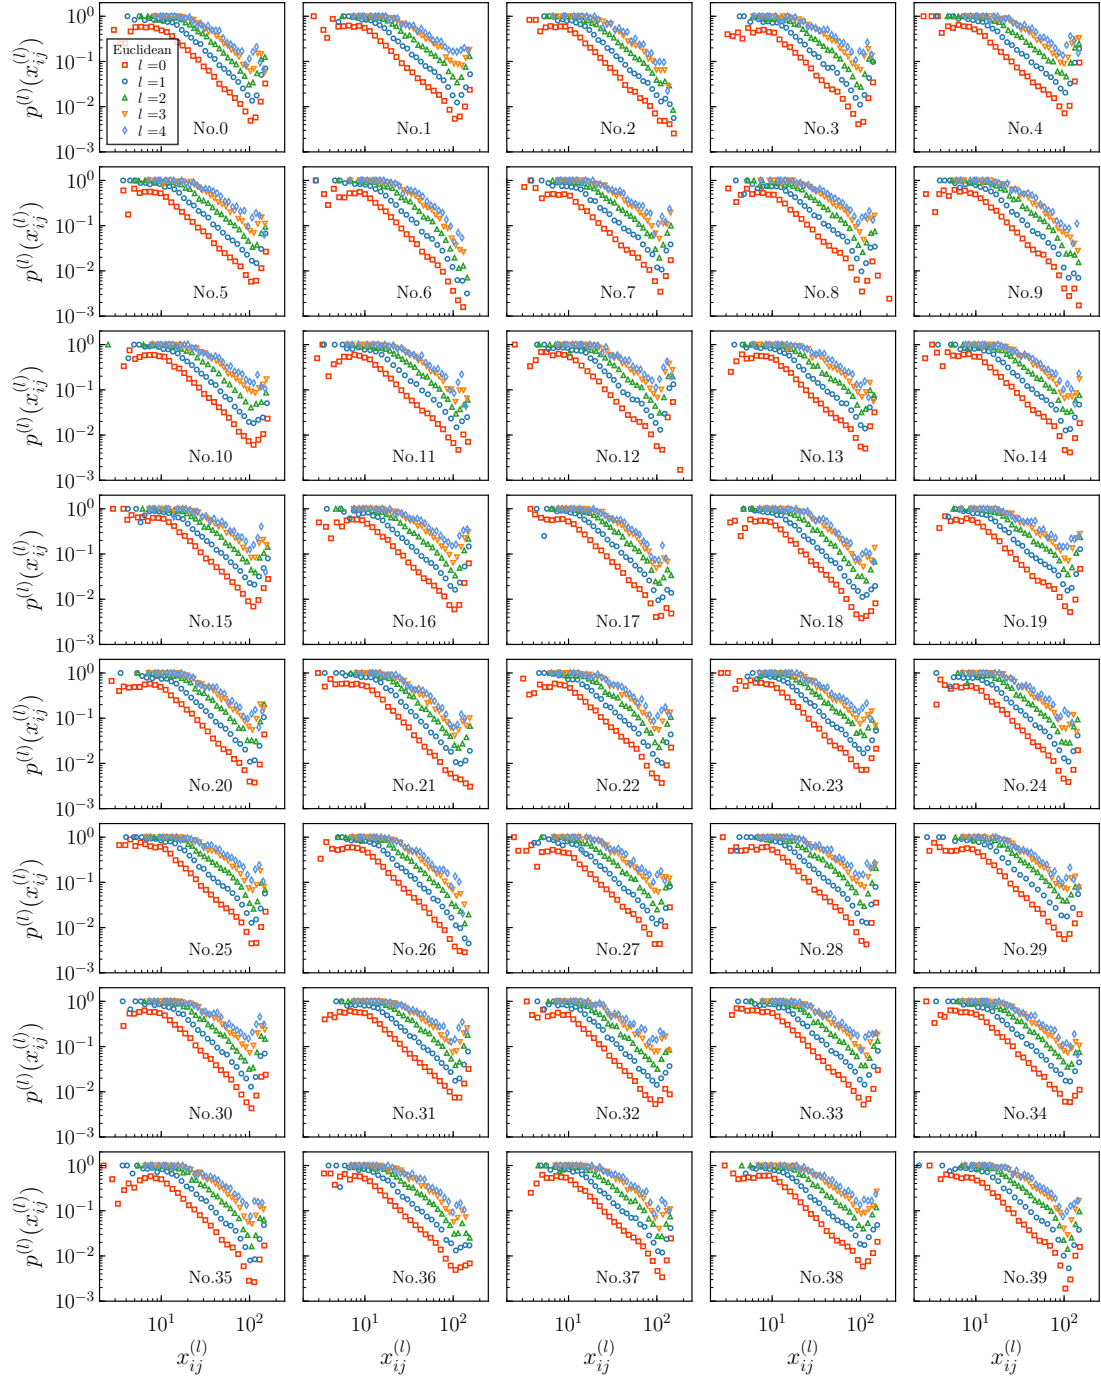

FIG. S13. Empirical connection probabilities  $p^{(l)}(x_{ij}^{(l)})$  for each subject in the Euclidean space. The whole range of Euclidean distances  $x_{ij}$  is binned, and for each bin the ratio of the number of connected connectome pairs to the total number of connectome pairs falling within this bin is shown.

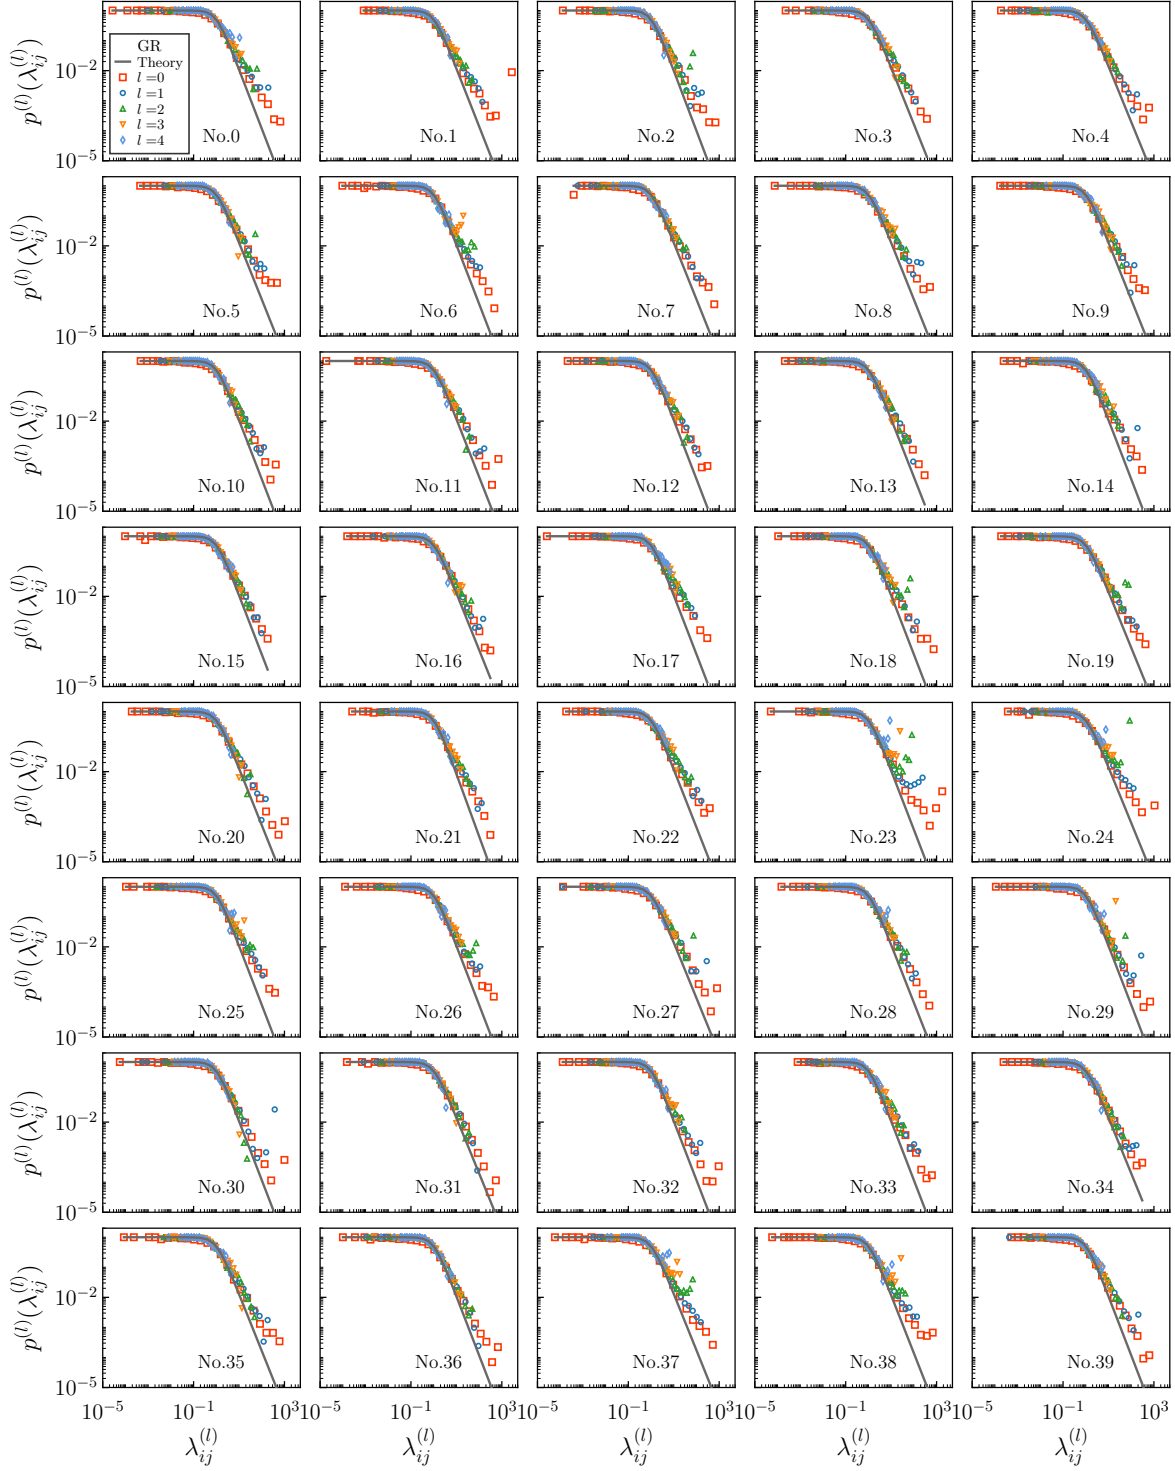

FIG. S14. Empirical versus theoretical connection probability  $p^{(l)}(\lambda_{ij}^{(l)})$  within a given range of  $\lambda_{ij}^{(l)}$  in GR shell for each subject. Open symbols are the connection probability of GR networks within a given range of  $\lambda_{ij}^{(l)}$  and the gray lines shows the theoretical curves.

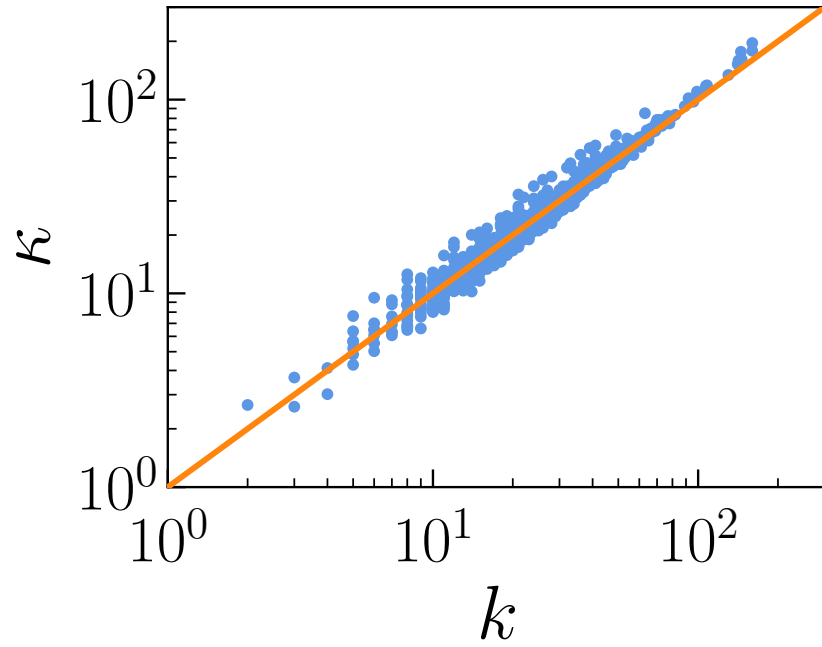

FIG. S15. Hidden degrees  $\kappa$  versus observed degree  $k$  of highest resolution layer in subject No. 10.

E. Navigability on the independent MH connectome layers and GR shell

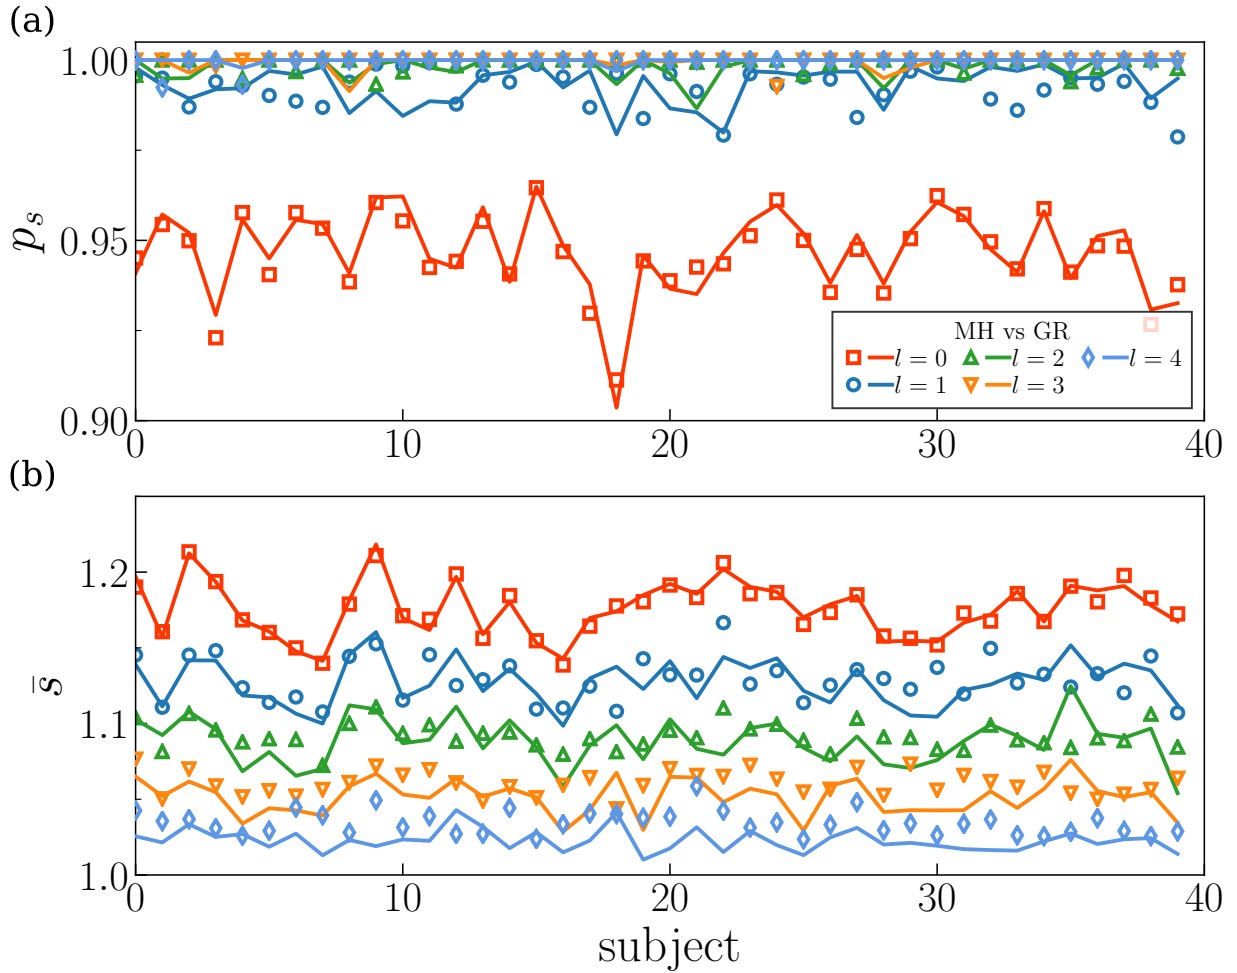

FIG. S16. Navigability in the hyperbolic space on the independent MH connectome layers and GR shell. open symbols correspond to the independent hyperbolic embeddings of the MH connectome layers and the solid lines to the GR shell.

## F. Multiscale navigation protocol.

In this section, we study the performance of the multiscale GR protocol[1] in the GR shell of the 40 MH connectomes. Notice that when a packet can get stuck into a loop in single layer greedy routing, the multiscale navigation protocol can find alternative paths by taking advantage of the increased efficiency of greedy forwarding in the coarse-grained layers. When node  $i$  needs to send a packet to a destination node  $j$ , node  $i$  performs a virtual greedy forwarding step in the highest possible layer to find which supernode should be next in the greedy path. Based on this, node  $i$  then forwards the packet to its physical neighbour in the real network, which guarantees that it will eventually reach such supernode. The full details of this process is described as follows.

To guarantee navigation inside supernodes, we require an extra condition in the renormalization process and only consider blocks of connected consecutive nodes (a single node can be left alone forming a supernode by itself) to produce the GR shell. Notice that the new requirement does not alter the self-similarity of the renormalized networks forming the multiscale shell nor the congruency with the hidden metric space [1].

With respect to standard greedy routing in single layered networks, the multiscale navigation protocol requires adding the following information about the supernodes and their neighbors.

- (i) The coordinates  $(r_i^{(l)}, \theta_i^{(l)})$  of node  $i$  in every layer  $l$ .
- (ii) For each node  $i$ , she should know her (super)neighbours list and their coordinates in each layer.
- (iii) Let  $\text{SuperN}(i, l)$  be the supernode to which  $i$  belongs in layer  $l$ . Supposed that  $\text{SuperN}(i, l)$  contains (super)nodes  $\{i, i_1, i_2 \dots\}$  and  $\text{SuperN}(k, l)$  has (super)nodes  $\{k, k_1, k_2 \dots\}$  in layer  $l$ . If  $\text{SuperN}(i, l)$  is connected to  $\text{SuperN}(k, l)$ , there is at least one edge between (super)nodes  $\{i, i_1, i_2 \dots\}$  and  $\{k, k_1, k_2 \dots\}$  in layer  $l$ , and the connected (super)nodes of  $\{i, i_1, i_2 \dots\}$  and  $\{k, k_1, k_2 \dots\}$  are called ‘gateway’. So, for every superneighbour of node  $\text{SuperN}(i, l)$  in layer  $l$ , node  $i$  knows which (super)node or (super)nodes in layer  $l - 1$  are gateways reaching it.
- (iv) If  $\text{SuperN}(i, l - 1)$  is a gateway reaching some supernode  $s$ , at least one of its (super)neighbours in layer  $l - 1$  belongs to  $s$ ; node  $i$  knows which.

This information allows us to navigate the network as follows. If node  $i$  wants to send a packet to a destination node  $j$ , node  $i$  should know  $j$ 's coordinates in all  $L$  layers  $(r_i^{(l)}, \theta_i^{(l)})$  and then node  $i$  will first check if it is connected to  $j$ ; in that case, the decision is clear. If it is not, it will perform a virtual greedy forwarding step in the highest possible layer to find which supernode should be next in the greedy path. The detailed steps are provided as following:

1. Find the highest layer  $l_{max}$  in which  $\text{SuperN}(i, l_{max})$  and  $\text{SuperN}(j, l_{max})$  still have different coordinates. Set  $l = l_{max}$ .
2. Perform a standard step of greedy routing in layer  $l$ : find the closest neighbour of  $\text{SuperN}(i, l)$  to  $\text{SuperN}(j, l)$ . This is the current target  $\text{SuperT}(l)$ .
3. While  $l > 0$ , look into layer  $l - 1$ :

Set  $l = l - 1$ .

If  $\text{SuperN}(i, l)$  is a gateway connecting to some (super)node within  $\text{SuperT}(l + 1)$ , node  $i$  sets as new current target  $\text{SuperT}(l)$  its (super)neighbour belonging to  $\text{SuperT}(l + 1)$  closest to  $\text{SuperN}(j, l)$ . Else node  $i$  sets as new target  $\text{SuperT}(l)$  the gateway in  $\text{SuperN}(i, l + 1)$  connecting to  $\text{SuperT}(l + 1)$  (its (super)neighbour belonging to  $\text{SuperN}(i, l + 1)$ ).

4. In layer  $l = 0$ ,  $\text{SuperT}(0)$  belongs to the real network and she is a neighbour of  $i$ , so node  $i$  forwards the message to  $\text{SuperT}(0)$ .

Fig. S17 (a) shows the gain in success rate as the number of renormalized layers used in the multiscale navigation process is increased, for the representative subject in the cohort. Interestingly, the navigability properties of every GR brain representation are very similar. For all subjects, the success rate increases significantly with the number of navigated layers in the shell, in fact it becomes very close to 100% with the inclusion of just two renormalized layers (Fig. S17 (c)), and this improvement comes at the expense of only a mild increase of the stretch of successful paths (Fig. S17 (b) and (d)).

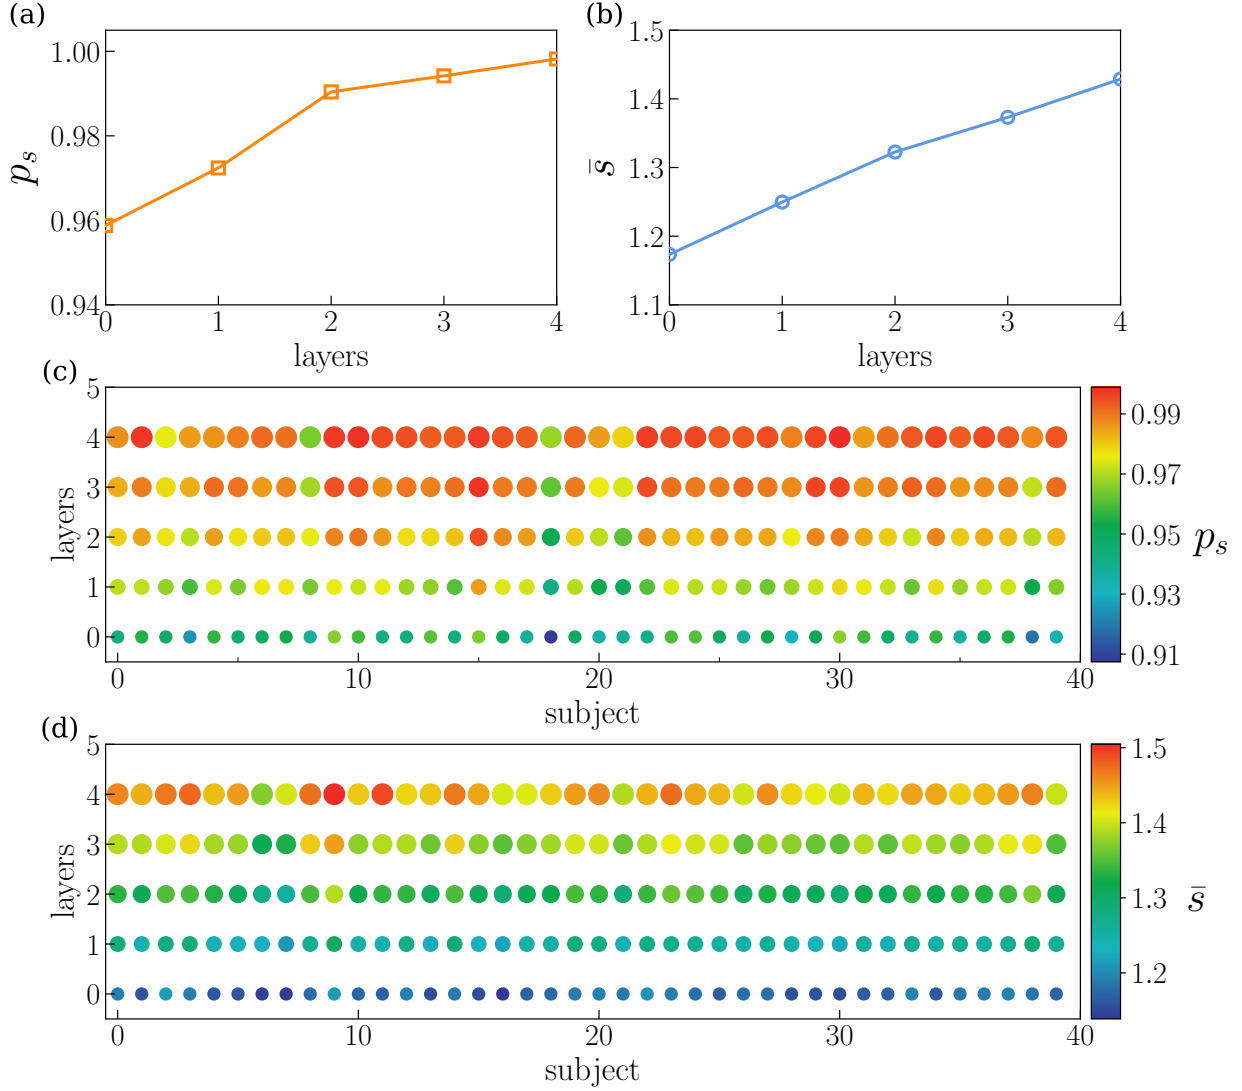

FIG. S17. **Performance of the GR multiscale navigation protocol in the GR shells of the human connectomes.** (a) Success rate  $p_s$  and (b) average stretch  $\bar{s}$  as a function of the number of GR shell layers used in the routing process for subject No. 10, computed for  $10^4$  randomly selected pairs of nodes in layer  $l = 0$ . (c) and (d) The same for the 40 subjects in the cohort. The colors of the dots represent the magnitude of the corresponding property and their sizes are proportional to the number of layers used in the routing process.



## G. Network properties of null models

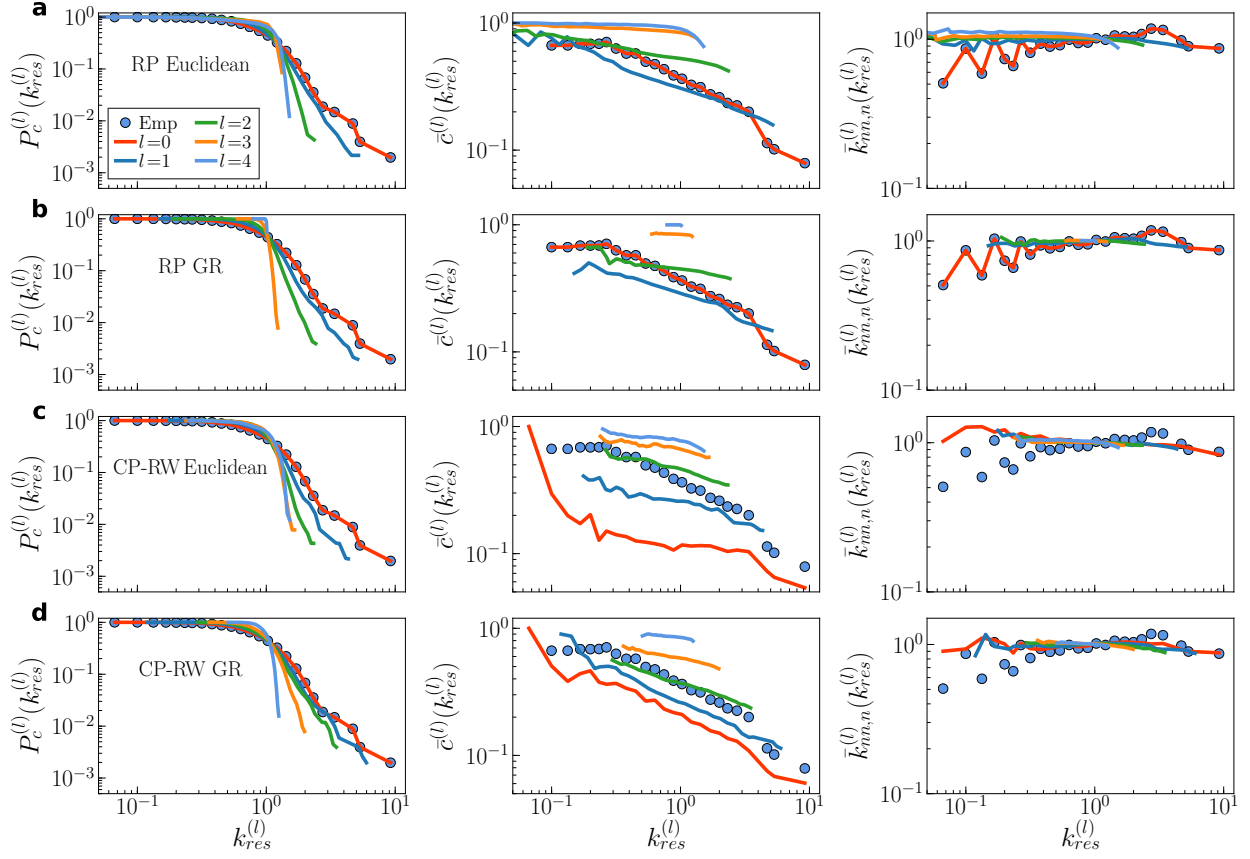

FIG. S18. **Loss the self-similarity in null networks.** Each column shows complementary cumulative degree distribution  $P_c^{(l)}(k_{res}^{(l)})$ , degree-dependent clustering coefficient  $\bar{c}^{(l)}(k_{res}^{(l)})$ , and degree-degree correlations  $\bar{k}_{nn,n}^{(l)}(k_{res}^{(l)})$ .

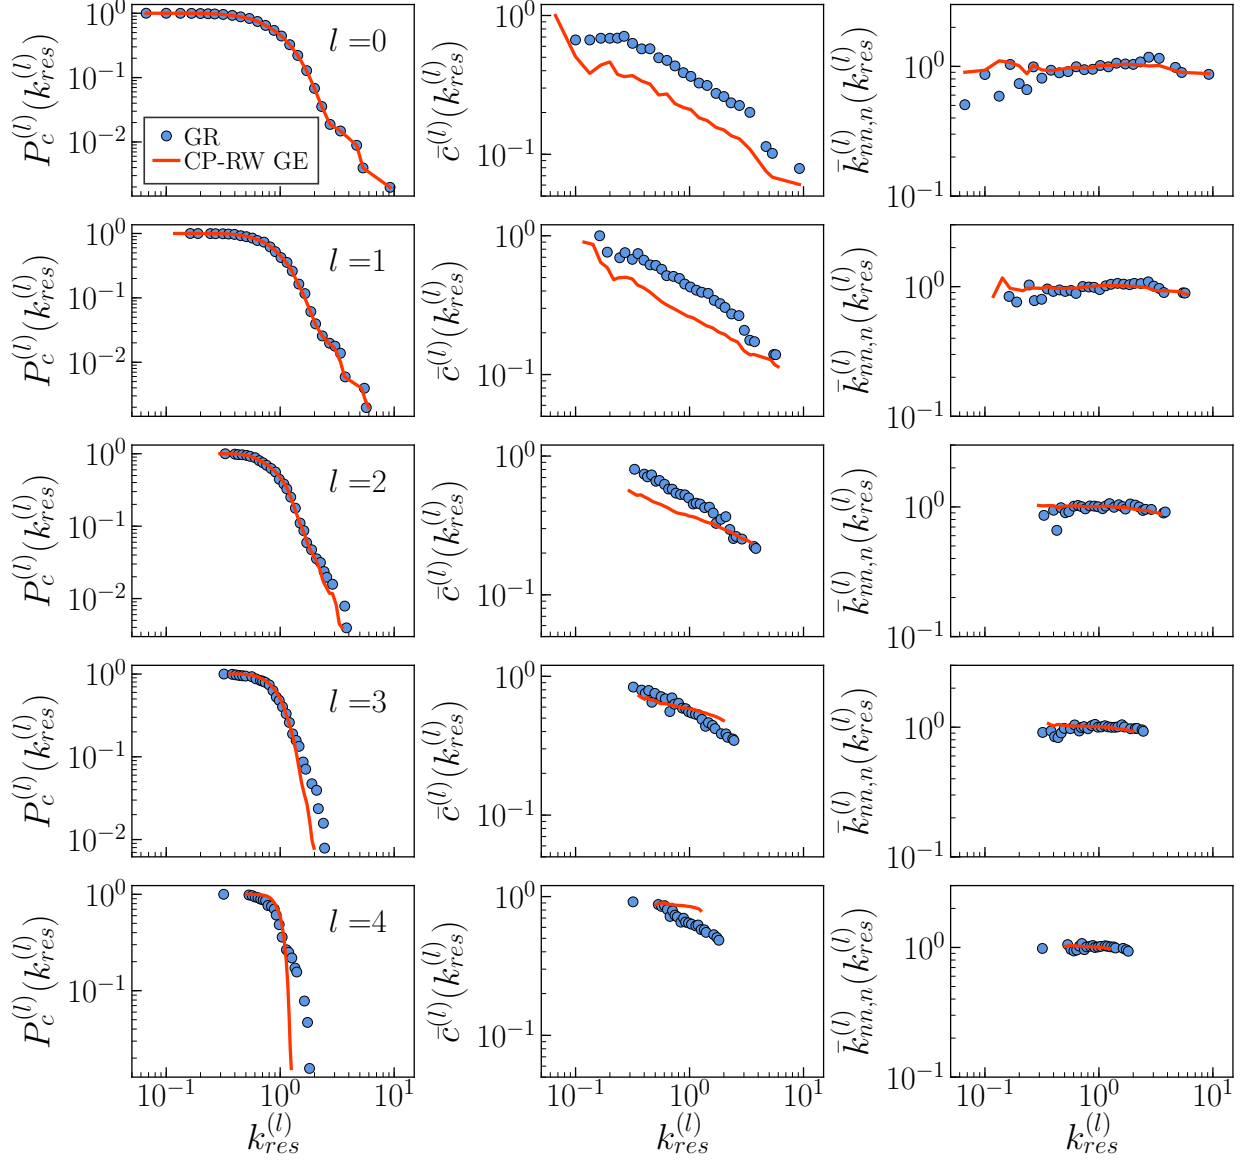

FIG. S19. **Comparison the network properties between standard GR and CP-RW GE model.** Each column shows complementary cumulative distribution  $P_C^{(l)}(k_{res}^{(l)})$ , degree dependent clustering coefficient  $\bar{c}^{(l)}(k_{res}^{(l)})$ , and degree-degree correlations  $\bar{k}_{nn,n}^{(l)}(k_{res}^{(l)})$ . We found that the self-similarity was still preserved to some extents in layer 0 to 2.

## II. CROSS-VALIDATING RESULTS IN THE HCP DATASET

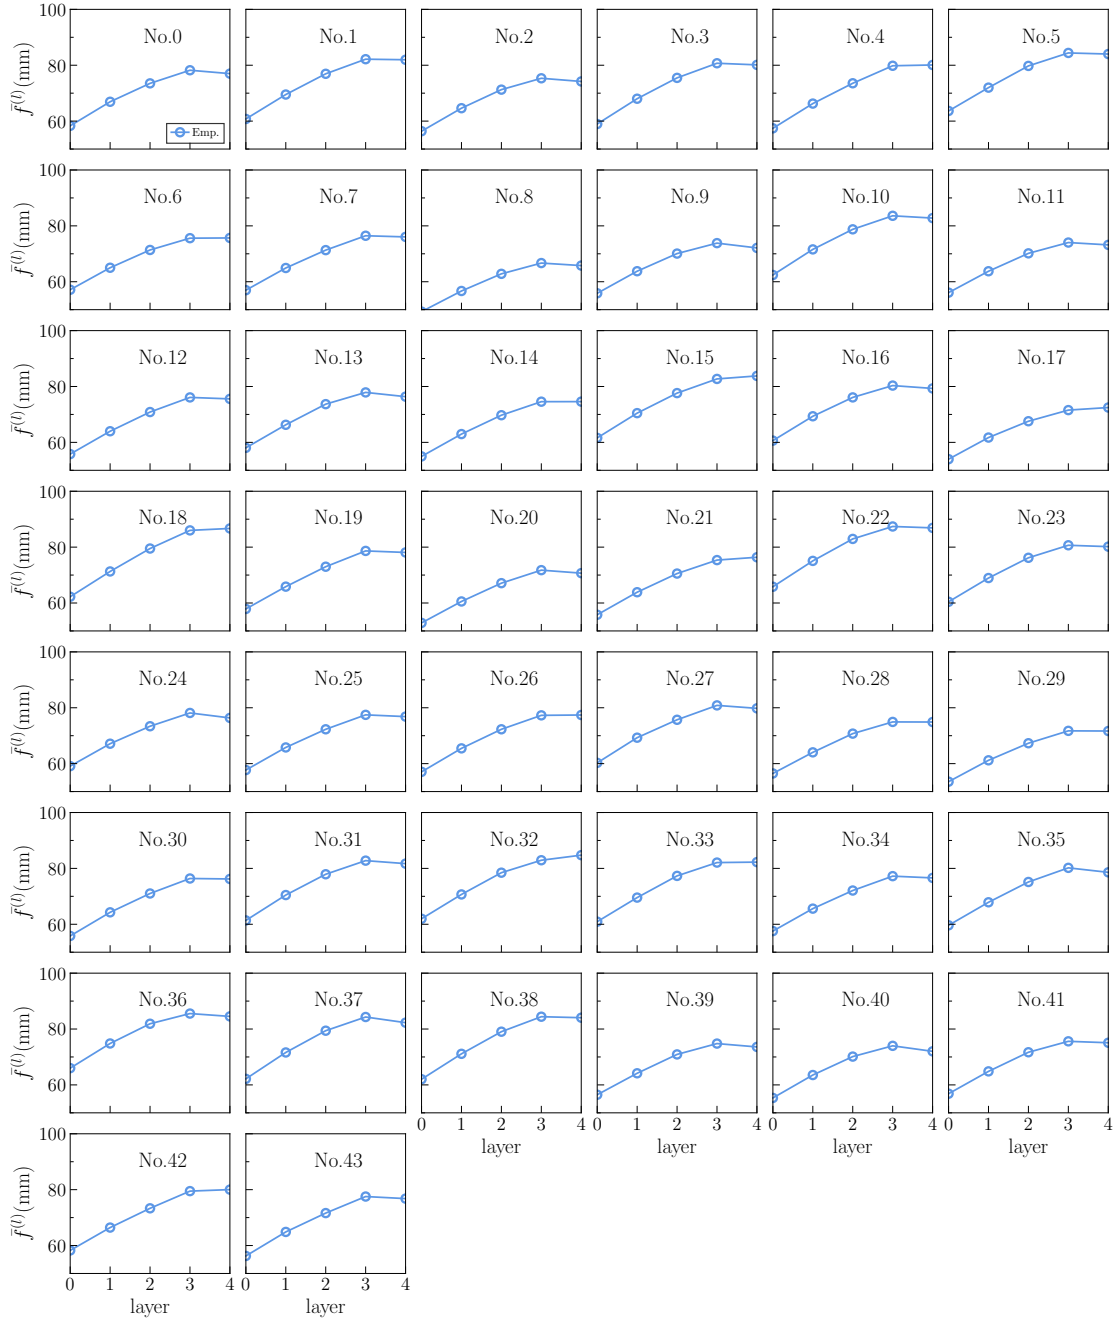

FIG. S20. Average fiber length  $\bar{f}^{(l)}$  for each subject in HCP dataset.

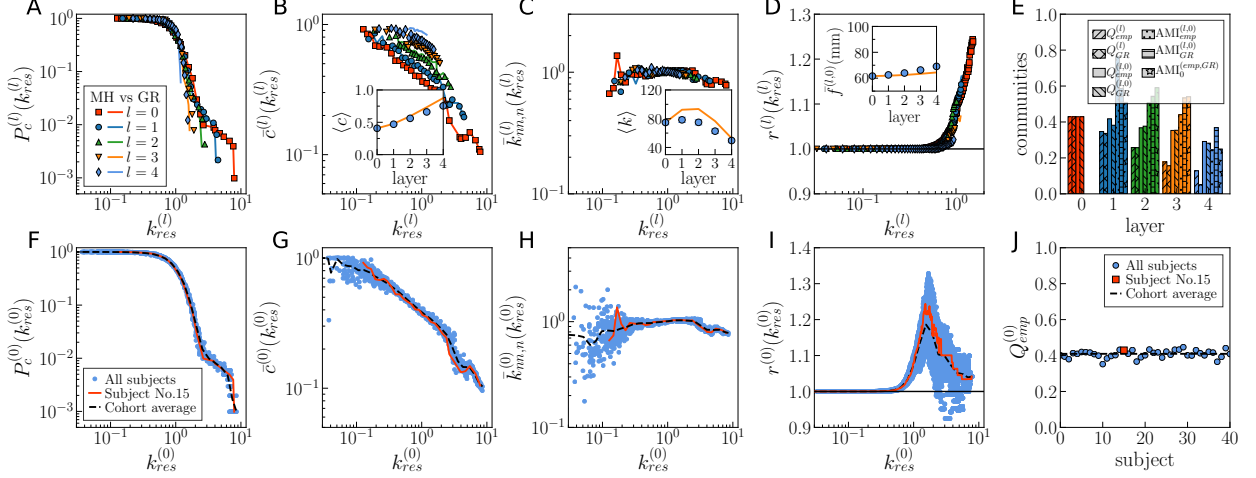

FIG. S21. **Self-similarity of the MH connectome at different resolutions.** (A-E) Results for HCP subject No. 15. Filled symbols correspond to the empirical MH connectome and the lines to the GR shell. (A) Complementary cumulative degree distribution  $P_c^{(l)}(k_{res}^{(l)})$ . (B) Degree dependent clustering coefficient  $\bar{c}^{(l)}(k_{res}^{(l)})$ . Inset: flow of the average clustering coefficient  $\langle c \rangle$ . (C) Degree-degree correlations  $\bar{k}_{nn,n}^{(l)}(k_{res}^{(l)})$ . Inset: flow of the average degree  $\langle k \rangle$ . (D) Rich club coefficient  $r^{(l)}(k_{res}^{(l)})$  for low and intermediate values of the rescaled threshold degrees. Inset: average fiber length  $\bar{f}^{(l,0)}$  in layer 0 of links outside supernodes in layer  $l$ , where supernodes are defined by the anatomical coarse-graining in the empirical curve or the similarity coarse-graining in the GR case. In the three insets in (B)-(D), error bars show the  $\pm 2$  standard error interval around the mean; when not visible the bars are within symbol size. (E) Community structure of the multiscale connectomes.  $Q^{(l)}$  is the modularity in layer  $l$ ,  $Q^{(l,0)}$  is the modularity that the community structure of layer  $l$  induces in layer 0, and  $AMI^{(l)}$  is the adjusted mutual information between the latter and the community partition directly detected in layer 0 (see Materials and Methods). The subindices  $\{emp, GR\}$  indicate the empirical MH connectomes and the GR shell, respectively.  $AMI_0^{(emp,GR)}$  is the adjusted mutual information between topological communities in the empirical MH connectomes at each layer and the GR flow measured in their projection over layer 0. (F-J) Variability of topological properties in the HCP dataset. Blue symbols correspond to the properties of layer 0 in all subjects. The red line correspond to HCP subject No. 10. The black dashed line represents the average value across the 44 subjects in the cohort. In the plots, degrees have been rescaled by the average degree of the corresponding layer  $k_{res}^{(l)} = k^{(l)} / \langle k^{(l)} \rangle$ .

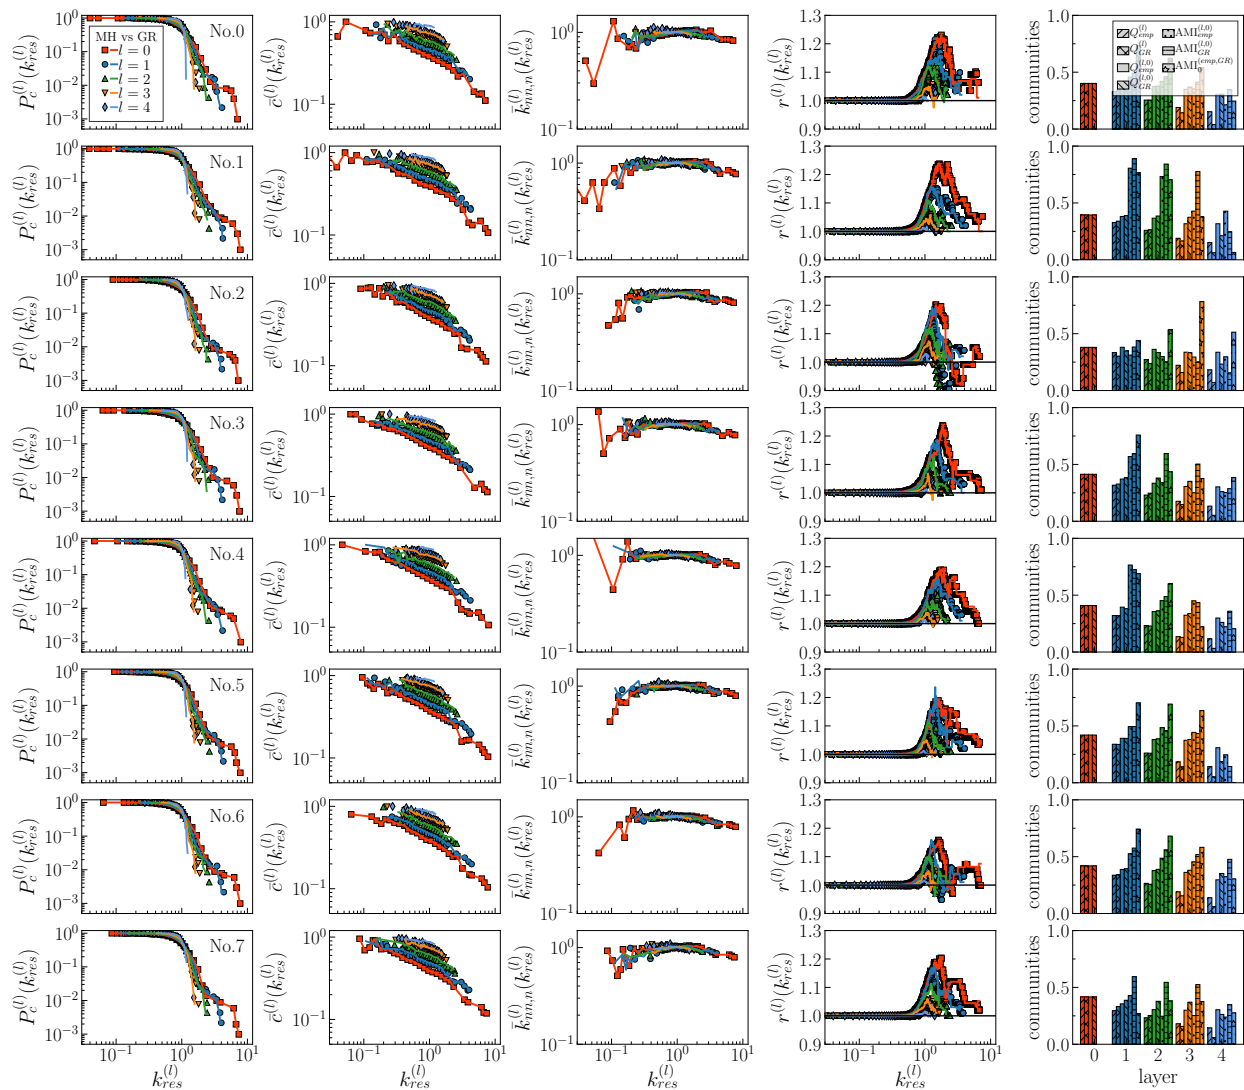

FIG. S22. **Self-similarity of the MH connectome at different resolutions.** We show results for subject No. 0-7 in HCP dataset. Filled symbols correspond to the empirical MH connectome and the lines to the GR shell. Each column shows complementary cumulative distribution  $P_c^{(l)}(k_{res}^{(l)})$ , degree dependent clustering coefficient  $\bar{c}^{(l)}(k_{res}^{(l)})$ , degree-degree correlations  $\bar{k}_{mn,n}^{(l)}(k_{res}^{(l)})$ , rich club coefficient  $r^{(l)}(k_{res}^{(l)})$ , and community structure of the multiscale connectomes.

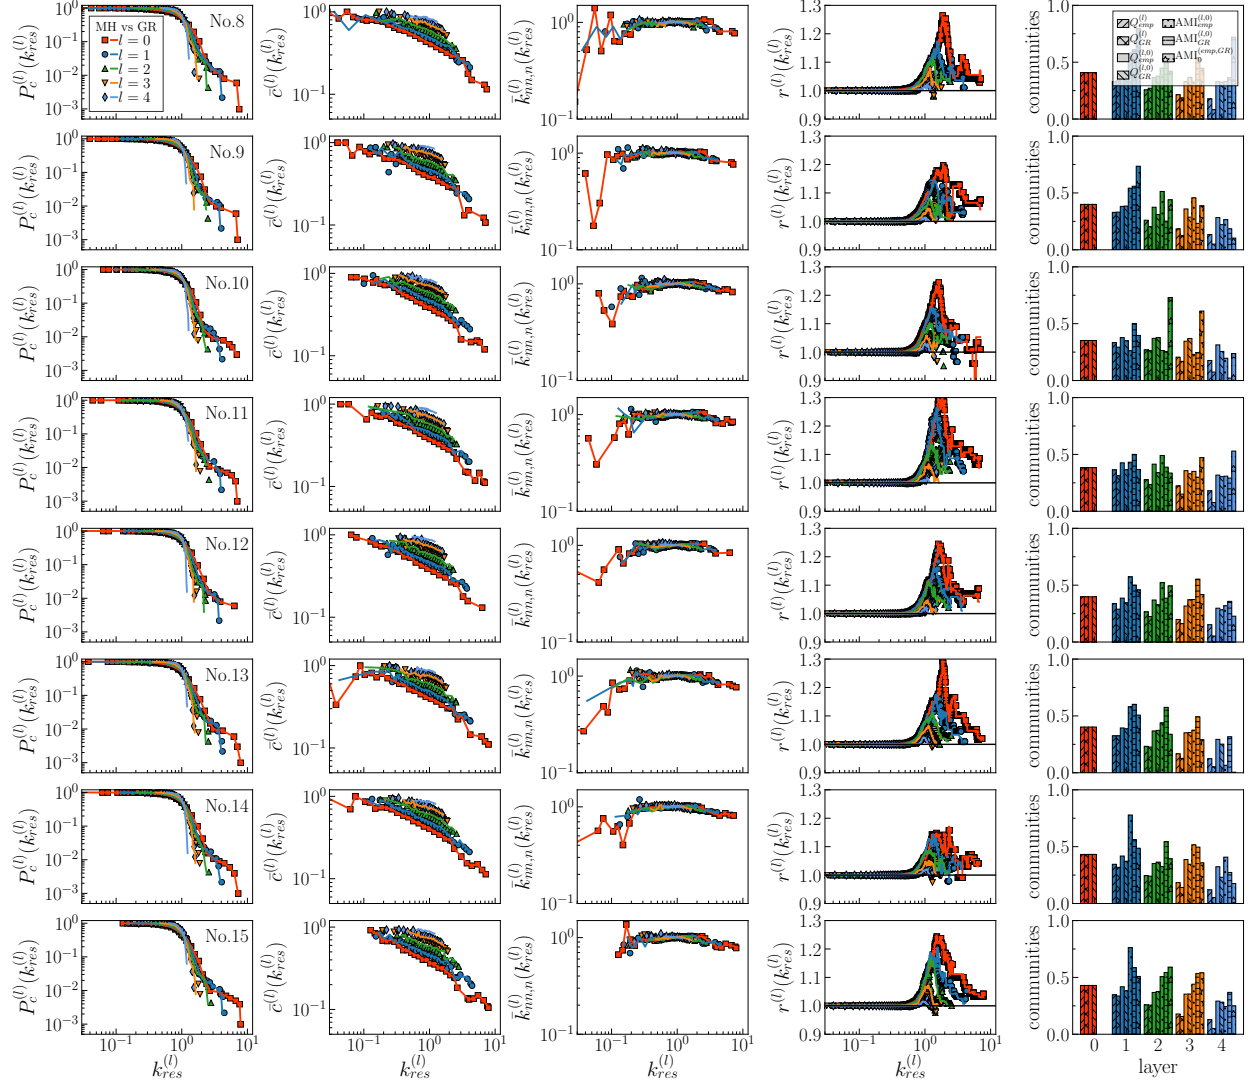

FIG. S23. **Self-similarity of the MH connectome at different resolutions.** We show results for subject No. 8-15 in HCP dataset. Filled symbols correspond to the empirical MH connectome and the lines to the GR shell. Each column shows complementary cumulative distribution  $P_c^{(l)}(k_{res}^{(l)})$ , degree dependent clustering coefficient  $\bar{c}^{(l)}(k_{res}^{(l)})$ , degree-degree correlations  $\bar{k}_{mn,n}^{(l)}(k_{res}^{(l)})$ , rich club coefficient  $r^{(l)}(k_{res}^{(l)})$ , and community structure of the multiscale connectomes.

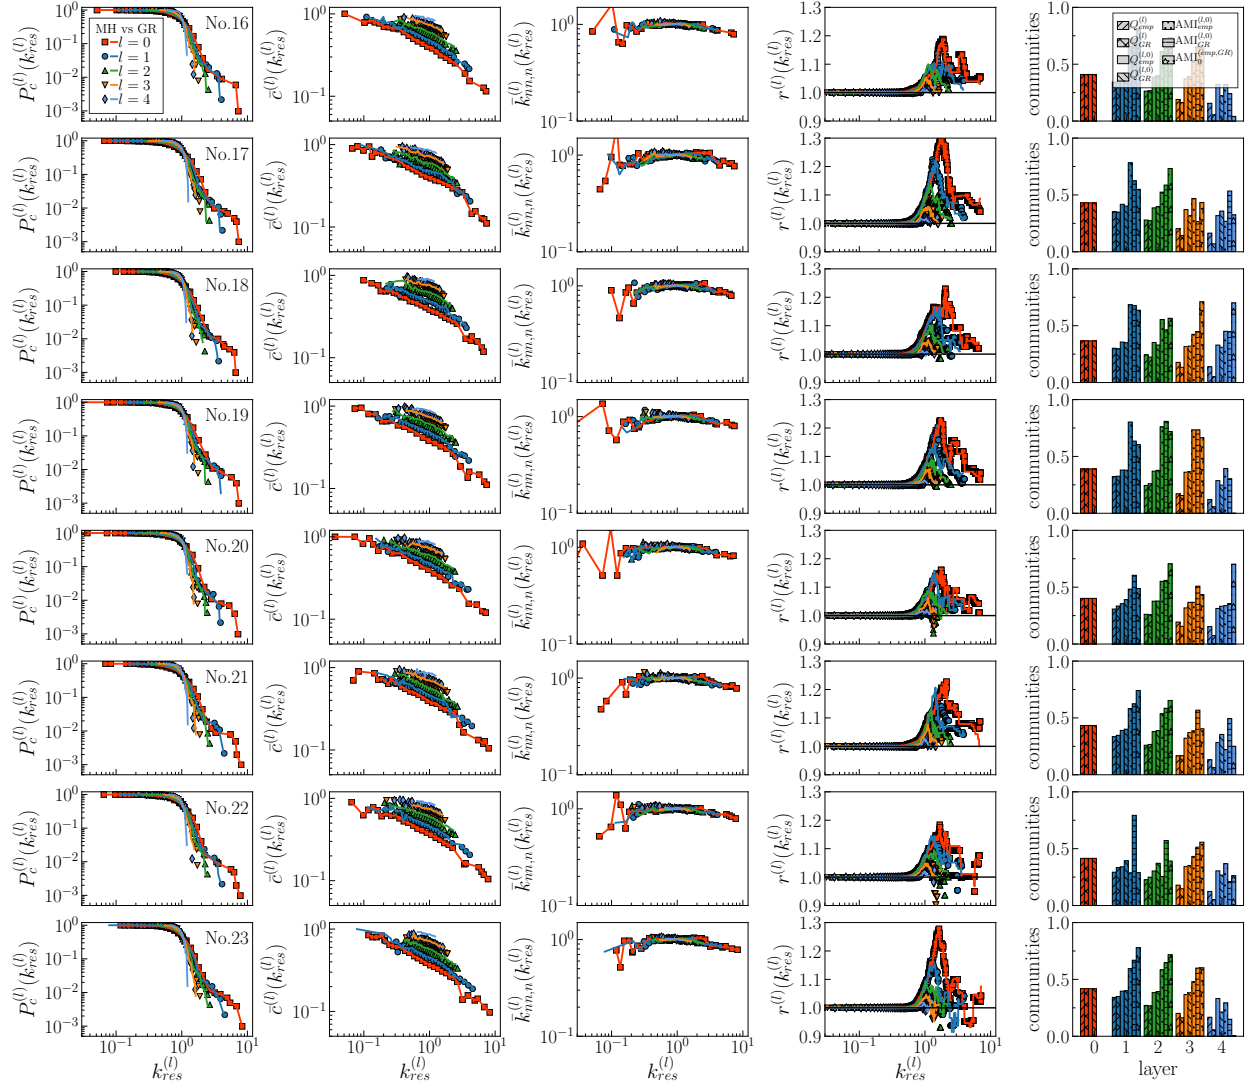

FIG. S24. **Self-similarity of the MH connectome at different resolutions.** We show results for subject No. 16-23 in HCP dataset. Filled symbols correspond to the empirical MH connectome and the lines to the GR shell. Each column shows complementary cumulative distribution  $P_c^{(l)}(k_{res}^{(l)})$ , degree dependent clustering coefficient  $\bar{c}^{(l)}(k_{res}^{(l)})$ , degree-degree correlations  $\bar{k}_{mn,n}^{(l)}(k_{res}^{(l)})$ , rich club coefficient  $r^{(l)}(k_{res}^{(l)})$ , and community structure of the multiscale connectomes.

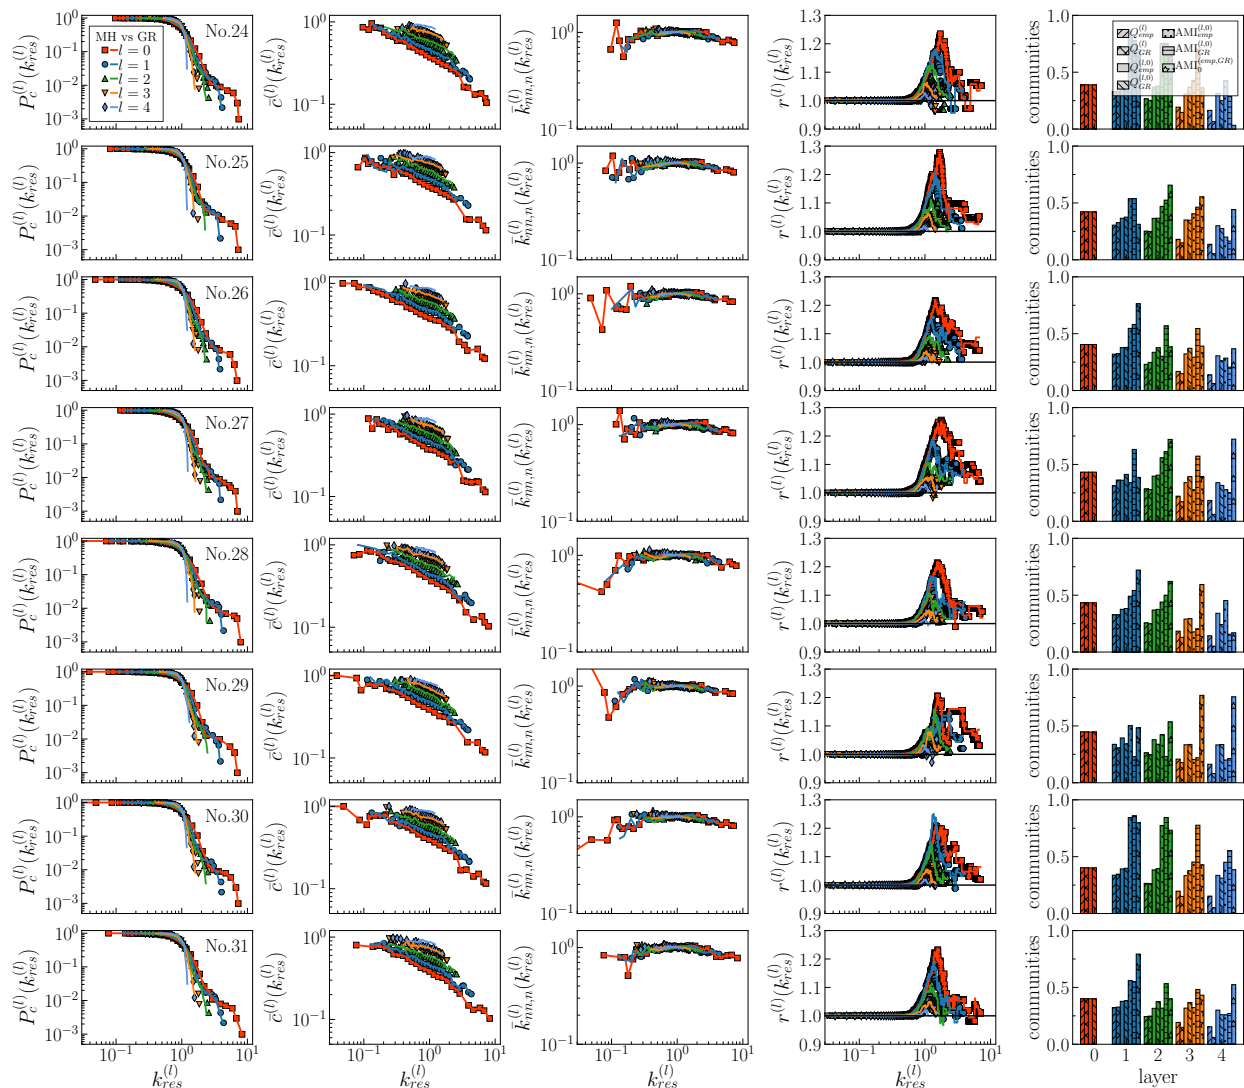

FIG. S25. **Self-similarity of the MH connectome at different resolutions.** We show results for subject No. 14-31 in HCP dataset. Filled symbols correspond to the empirical MH connectome and the lines to the GR shell. Each column shows complementary cumulative distribution  $P_c^{(l)}(k_{res}^{(l)})$ , degree dependent clustering coefficient  $\bar{c}^{(l)}(k_{res}^{(l)})$ , degree-degree correlations  $\bar{k}_{mn,n}^{(l)}(k_{res}^{(l)})$ , rich club coefficient  $r^{(l)}(k_{res}^{(l)})$ , and community structure of the multiscale connectomes.



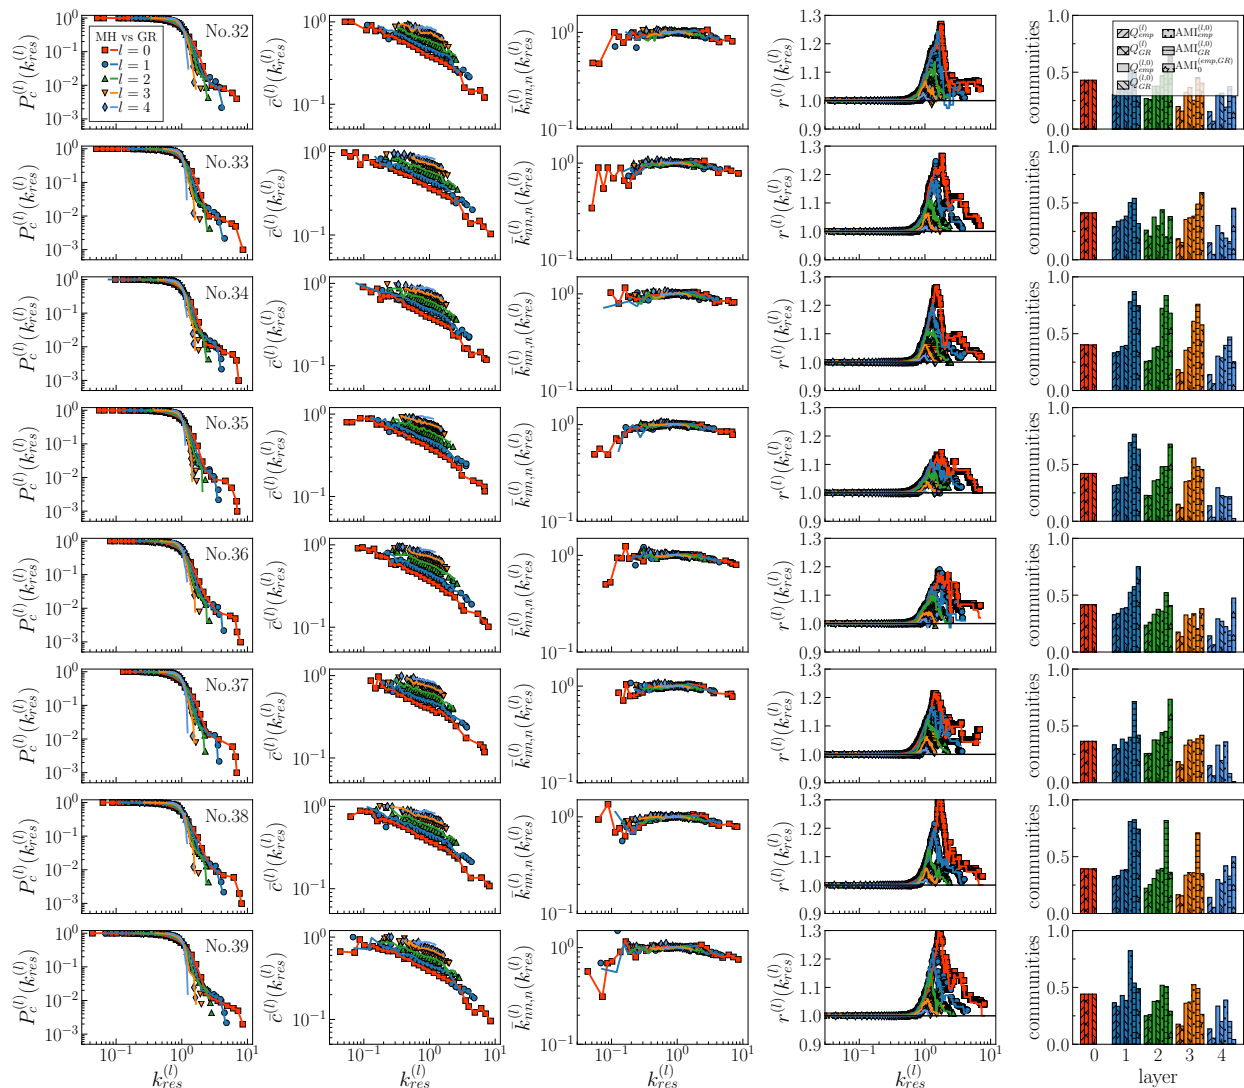

FIG. S26. **Self-similarity of the MH connectome at different resolutions.** We show results for subject No. 32-39 in HCP dataset. Filled symbols correspond to the empirical MH connectome and the lines to the GR shell. Each column shows complementary cumulative distribution  $P_c^{(l)}(k_{res}^{(l)})$ , degree dependent clustering coefficient  $\bar{c}^{(l)}(k_{res}^{(l)})$ , degree-degree correlations  $\bar{k}_{mn,n}^{(l)}(k_{res}^{(l)})$ , rich club coefficient  $r^{(l)}(k_{res}^{(l)})$ , and community structure of the multiscale connectomes.

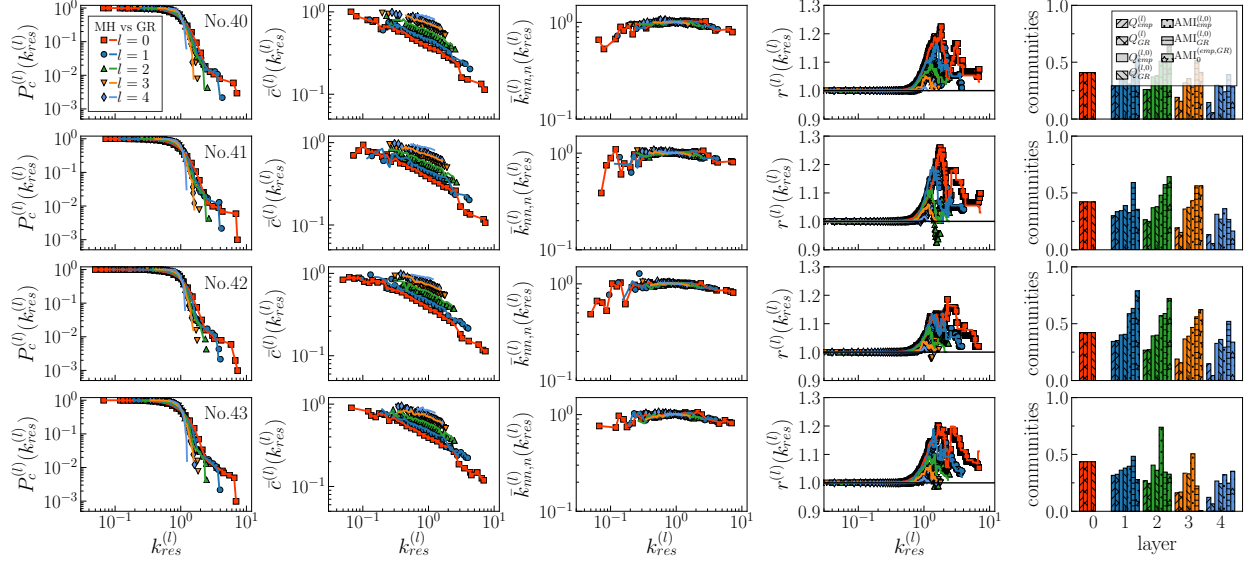

FIG. S27. **Self-similarity of the MH connectome at different resolutions.** We show results for subject No. 40-43 in HCP dataset. Filled symbols correspond to the empirical MH connectome and the lines to the GR shell. Each column shows complementary cumulative distribution  $P_c^{(l)}(k_{res}^{(l)})$ , degree dependent clustering coefficient  $\bar{c}^{(l)}(k_{res}^{(l)})$ , degree-degree correlations  $\bar{k}_{nn,n}^{(l)}(k_{res}^{(l)})$ , rich club coefficient  $r^{(l)}(k_{res}^{(l)})$ , and community structure of the multiscale connectomes.

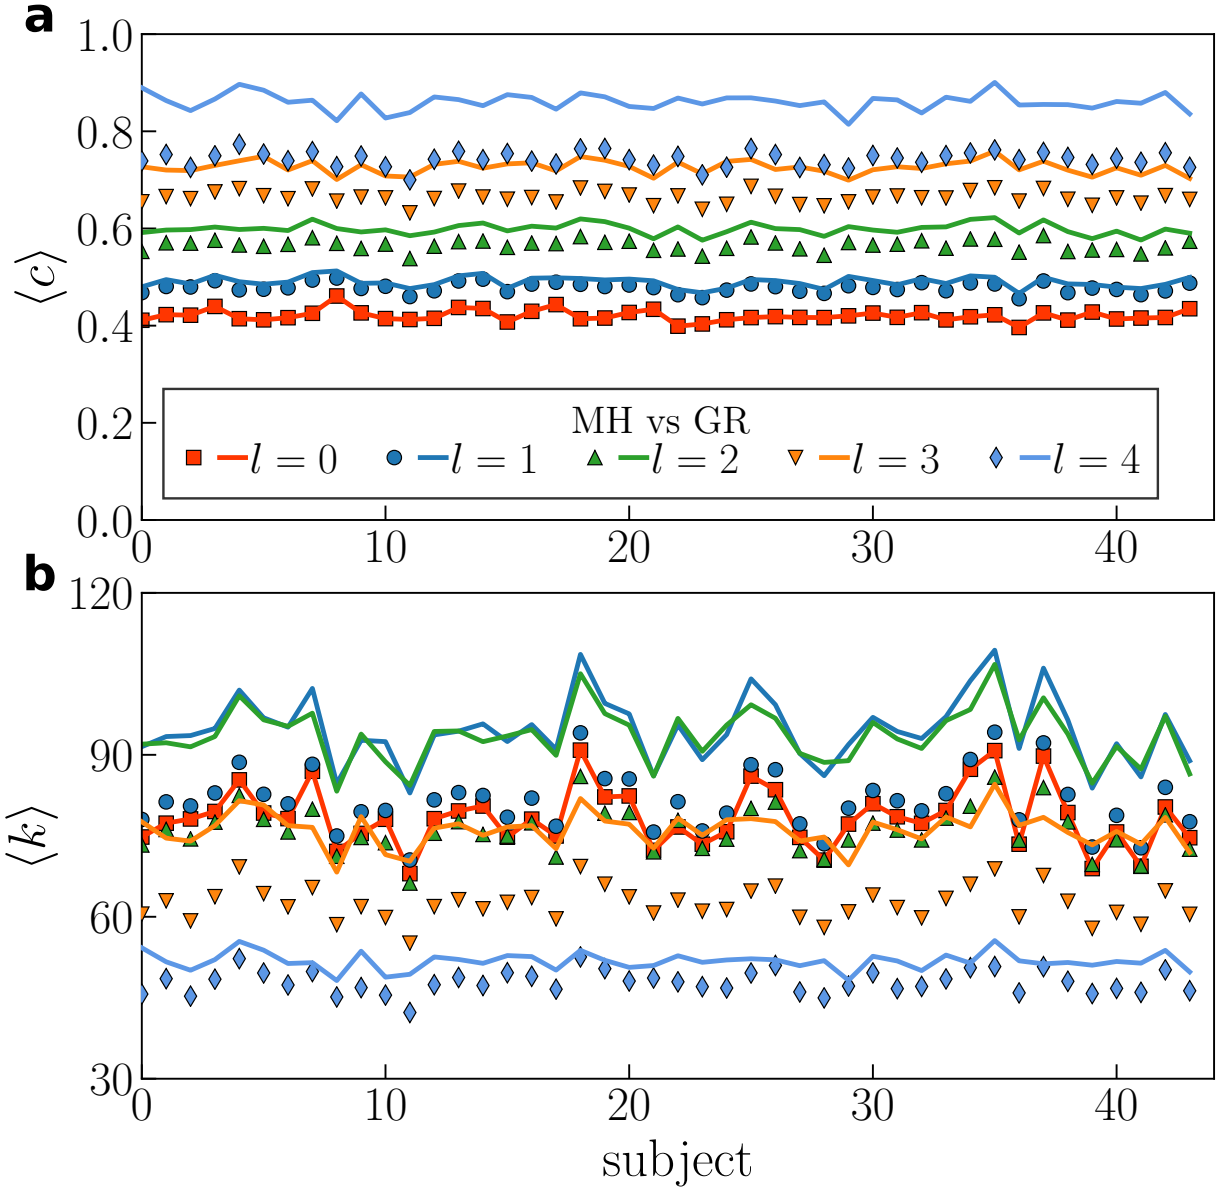

FIG. S28. Average clustering coefficient (a) and mean degree (b) for all the layers in each subject as compared to the multiscale GR unfolding, where the symbols correspond to the empirical multiscale connectome and the lines to the GR flow.

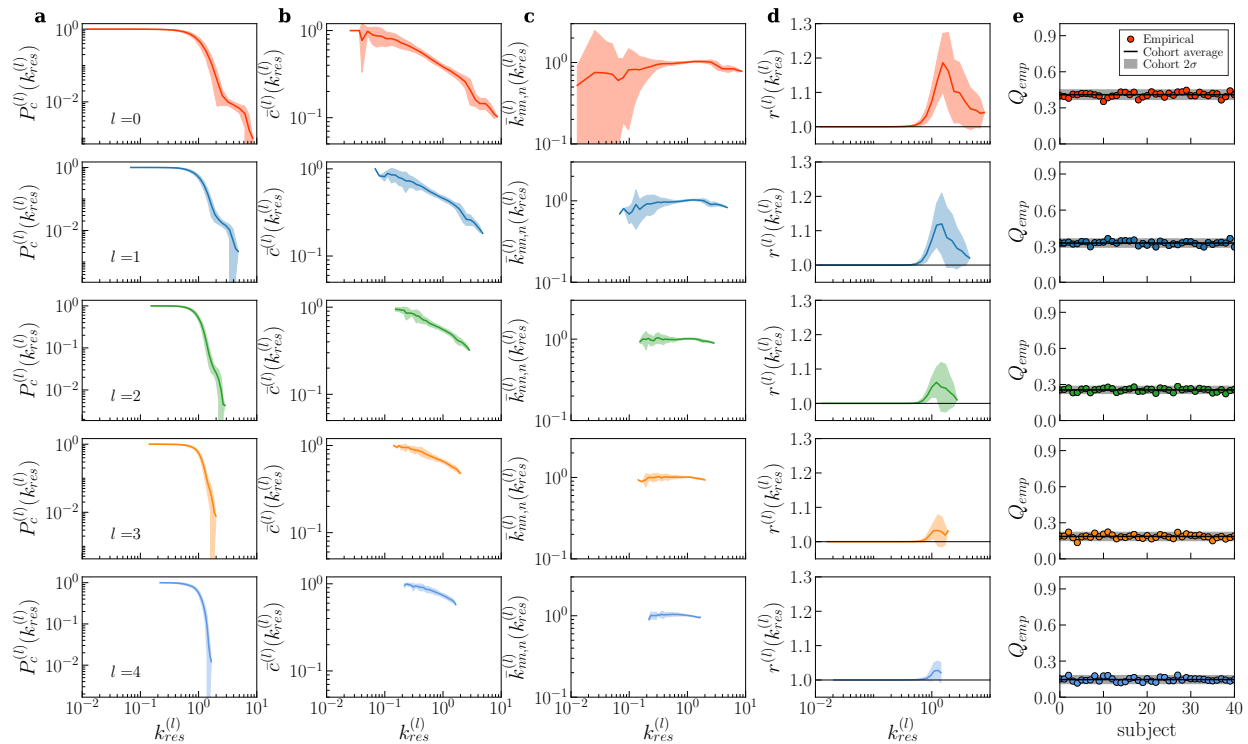

FIG. S29. **Network properties across 44 subjects for all layers in the HCP dataset.** Each column shows the complementary cumulative degree distribution, degree-dependent clustering coefficient, degree-degree correlations, rich club coefficient and modularity. The degrees have been rescaled by the internal average degree of the corresponding layer  $k_{res}^{(l)} = k^{(l)} / \langle k^{(l)} \rangle$ . The solid lines show the corresponding average values across 44 subjects in the cohort and the shadows indicate  $2\sigma$  deviations.

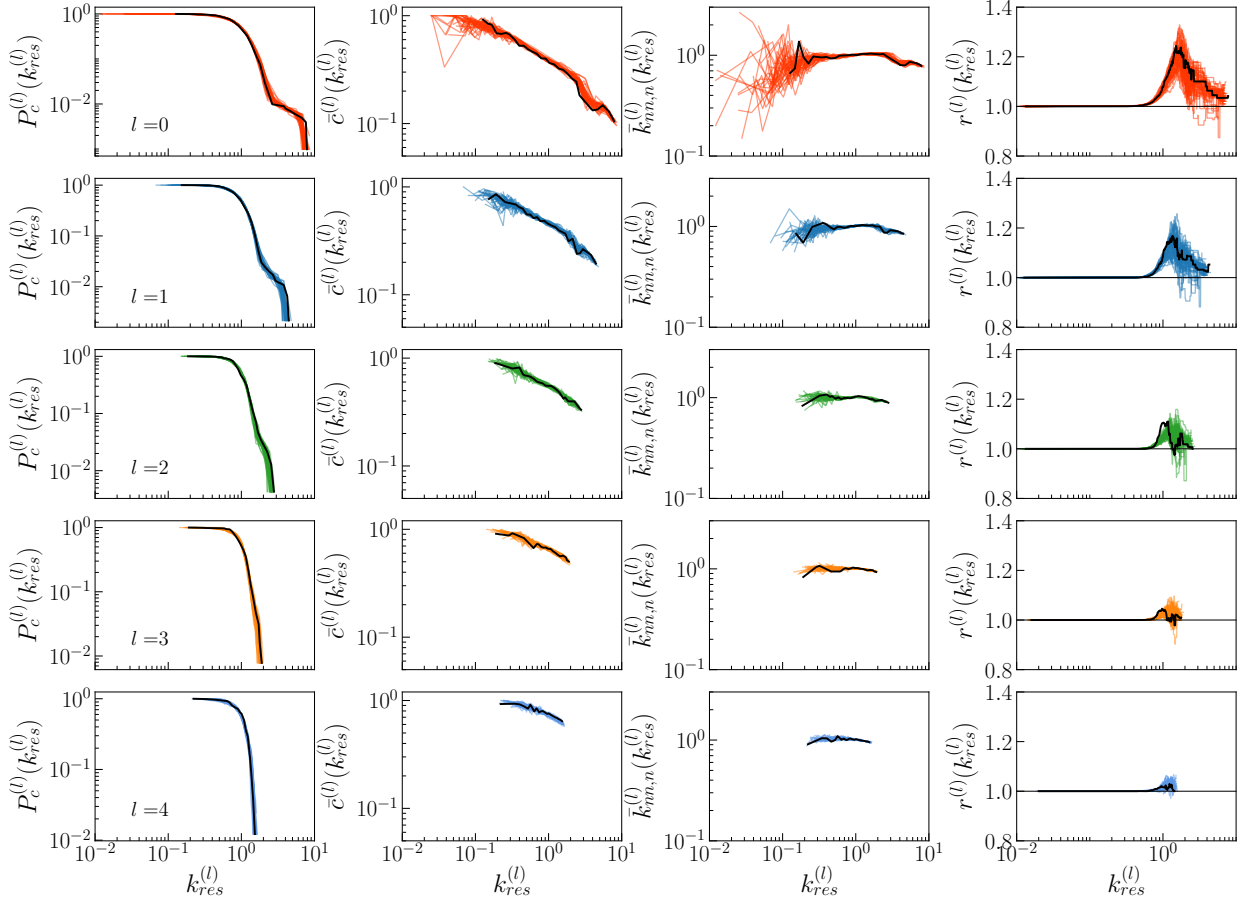

FIG. S30. **Subject No. 15 is a typical subject in HCP dataset.** Each column shows the complementary cumulative degree distribution, degree dependent clustering coefficient, degree-degree correlations and rich club coefficient. The degrees have been rescaled by the internal average degree of the corresponding layer  $k_{res}^{(l)} = k^{(l)} / \langle k^{(l)} \rangle$ . Different lines correspond to different subject in each cohort. The results for subject No. 15 have been highlighted in black color.

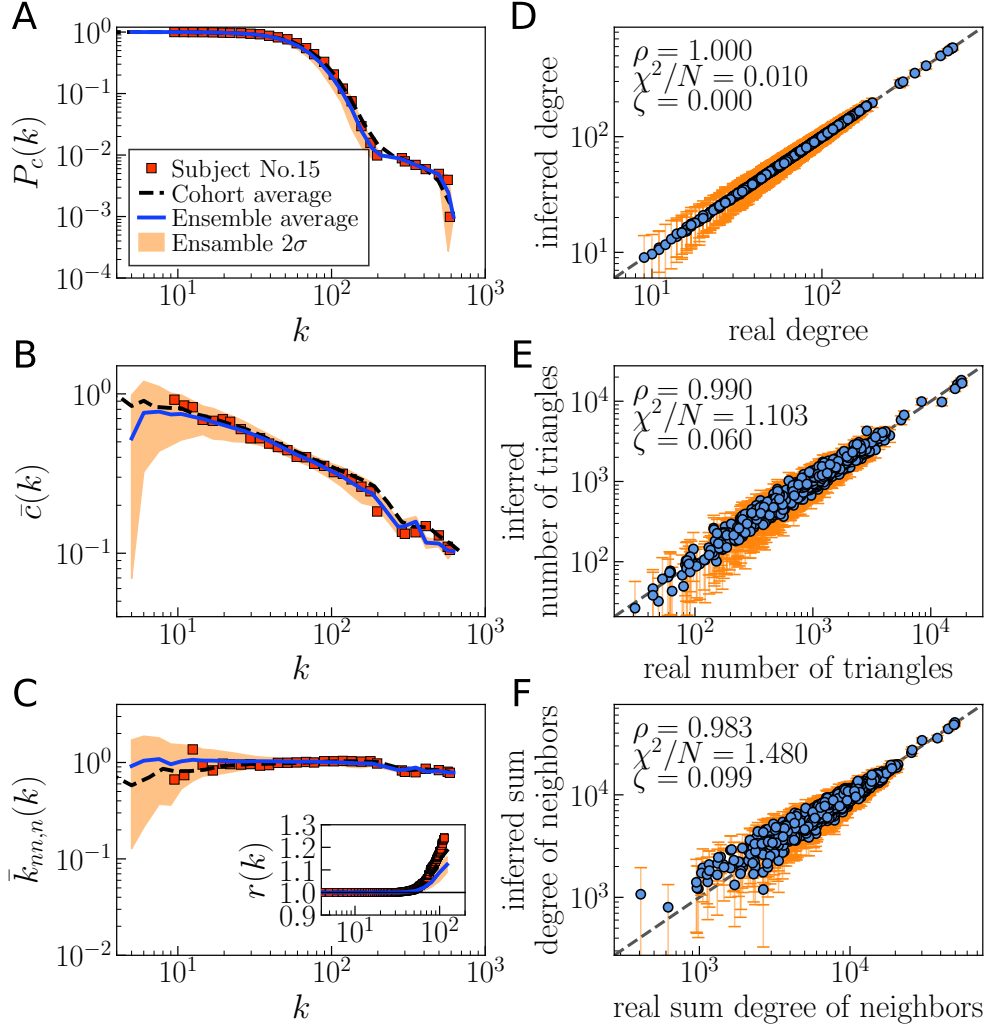

FIG. S31. **Network properties of  $l = 0$  as compared to model predictions for HCP subject No. 15.** (A) Complementary cumulative degree distribution, (B) clustering spectrum, (C) average nearest neighbors degree, and (C)-inset rich club coefficient. Red symbols correspond to subject No. 15, and black dashed lines to the group average across the 44 subjects in the sample. Blue lines correspond to the ensemble average over 100 synthetic networks generated with the  $\mathbb{S}^1$  model using the coordinates and parameters inferred by Mercator [2], and the orange regions to the  $2\sigma$  confidence interval around the expected value. (D)-(F) Comparison of predictions in our model (average over the ensemble of 100 synthetic networks) with real values for (D) degrees, (E) number of triangles, and (F) sum of degrees of neighbors. Error bars show the  $2\sigma$  confidence interval around the expected values. Statistical tests for the goodness of fit — Pearson correlation coefficient  $\rho$ ,  $\chi^2$  test is normalized by the number of nodes, and  $\zeta$  score— are reported in each graph.

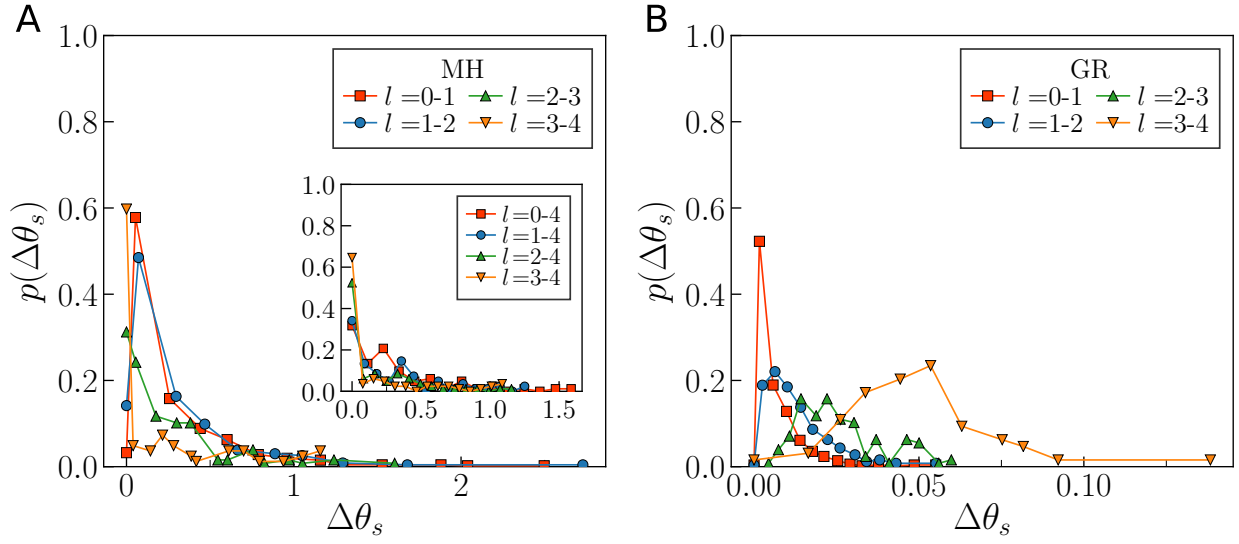

FIG. S32. Results for HCP subject No. 15. (A) and (B). Distribution  $p(\Delta\theta_s)$  of average angular separation between subnodes of coarse-grained nodes from one layer to the next in MH and GR, respectively. The inset in (A) shows the distribution  $p(\Delta\theta_s)$  from layer  $l$  to 4 in MH.

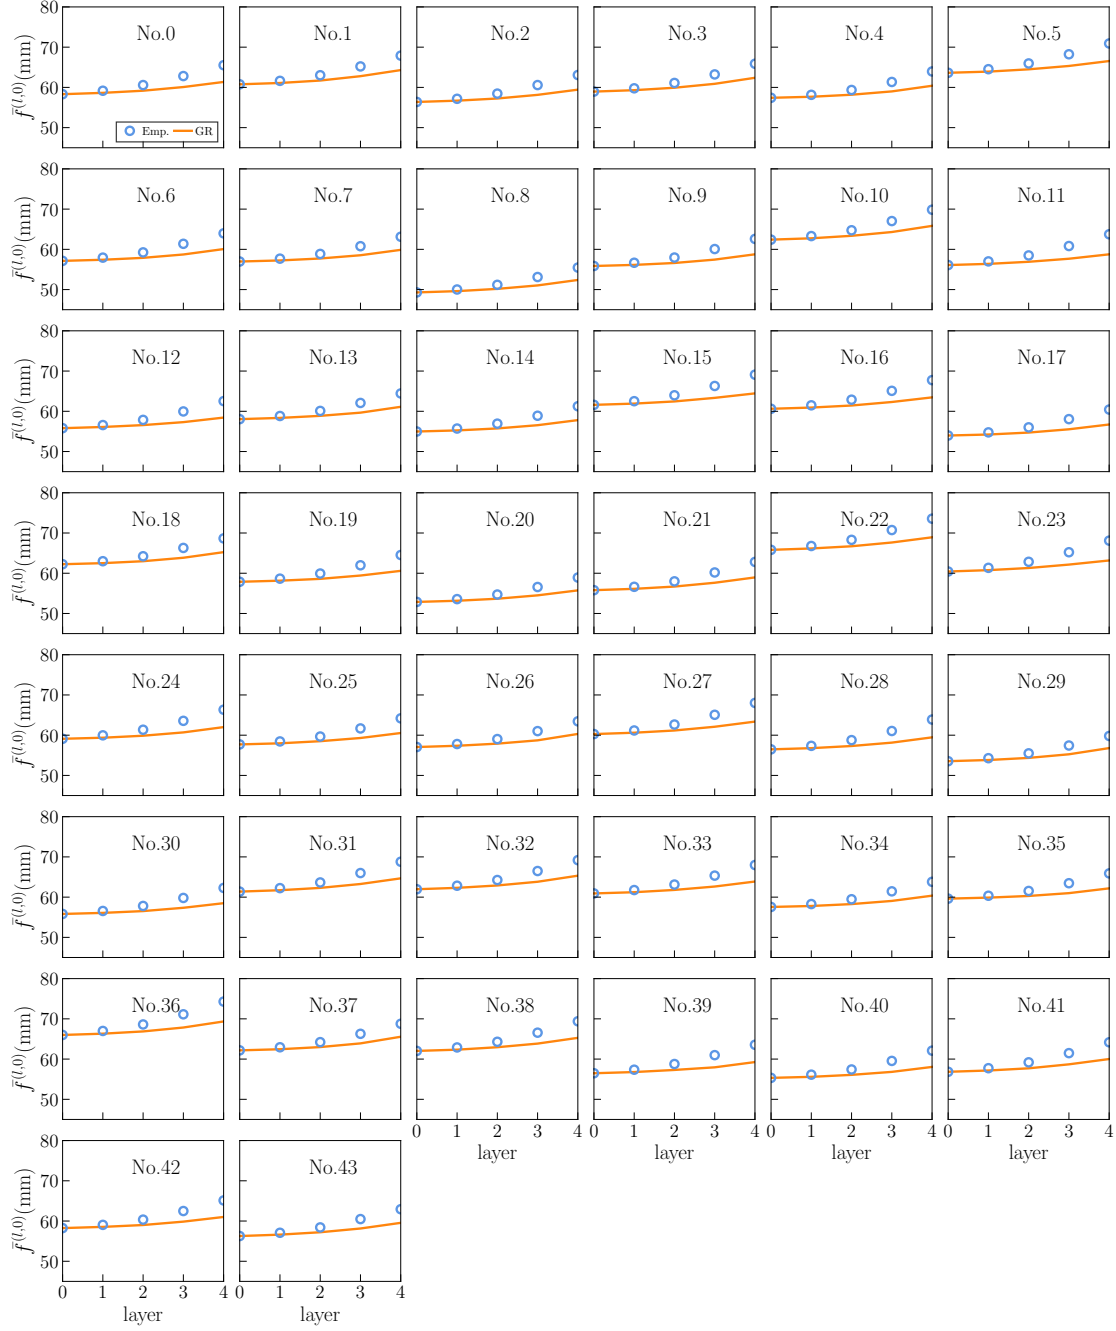

FIG. S33. Average fiber length  $\bar{f}^{(l,0)}$  in layer 0 of links outside supernodes in layer  $l$ , where supernodes are defined by the anatomical coarse-graining in the empirical curve (symbols) or the similarity coarse-graining in the GR case (lines).



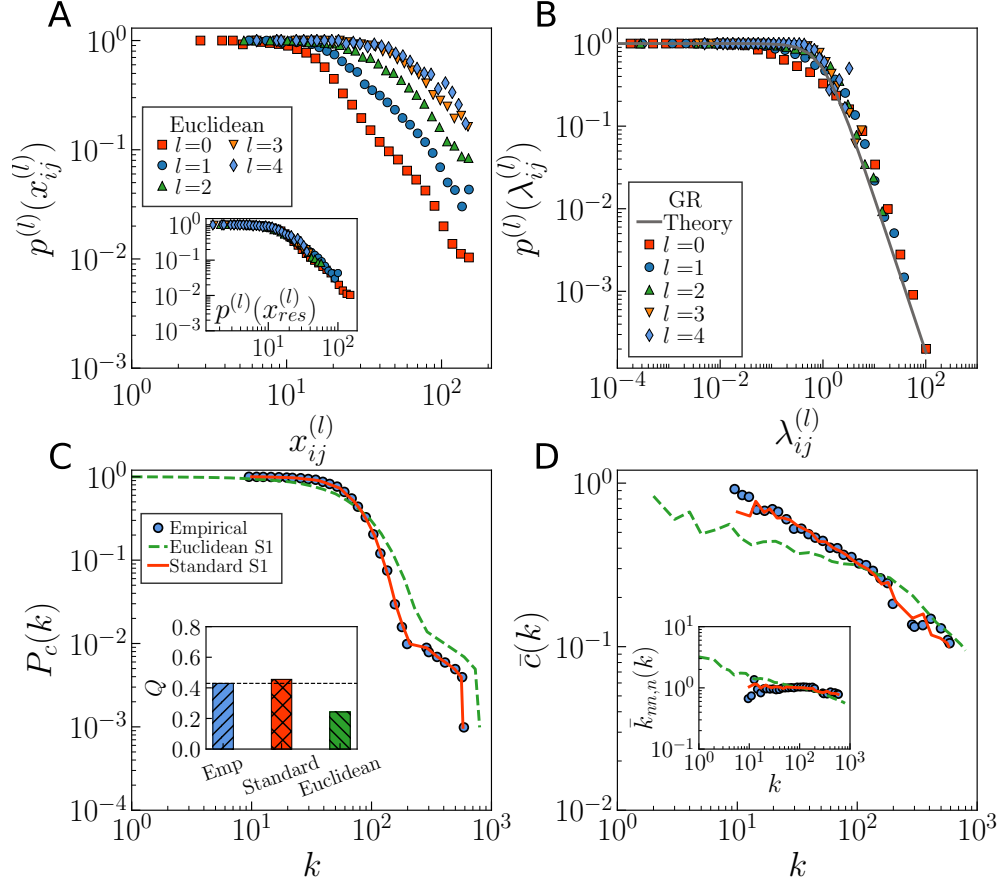

FIG. S34. **Empirical vs theoretical probability of connection.** Results for HCP subject No. 15. (A) Empirical connection probabilities  $p^{(l)}(x_{ij}^{(l)})$  in Euclidean space. Euclidean distances  $x_{ij}$  are binned, and for each bin the ratio of the number of connected node pairs to the total number of pairs falling within the bin is shown. Inset shows the empirical connection probabilities  $p^{(l)}(x_{res}^{(l)})$  as a function of rescale distances  $x_{res}^{(l)} = x^{(l)}/a^{(l)}$  in the MH connectome, where the  $a^{(l)} = [1.0, 1.5, 2.6, 3.8, 4.0]$  for different layer  $l$ . (B) Empirical versus theoretical connection probability  $p^{(l)}(\lambda_{ij}^{(l)})$  in the GR shell as a function of hyperbolic distance  $\lambda_{ij}^{(l)}$ . (C) Complementary cumulative degree distribution  $P_c(k)$ . Modularity  $Q$ , as measured by the Louvain method, is shown in the inset. (D) Degree dependent clustering coefficient  $\bar{c}(k)$ . Inset: degree-degree correlations  $\bar{k}_{nn,n}(k)$ . The filled symbols correspond to the empirical connectome of Subject No. 15. Green dashed lines are generated using the  $\mathbb{S}^1$  model with Euclidean distances ( $\beta = 2.31, \mu = 0.0030$ ), and red lines correspond to the standard  $\mathbb{S}^1$  model ( $\beta = 1.87, \mu = 0.0039$ ).

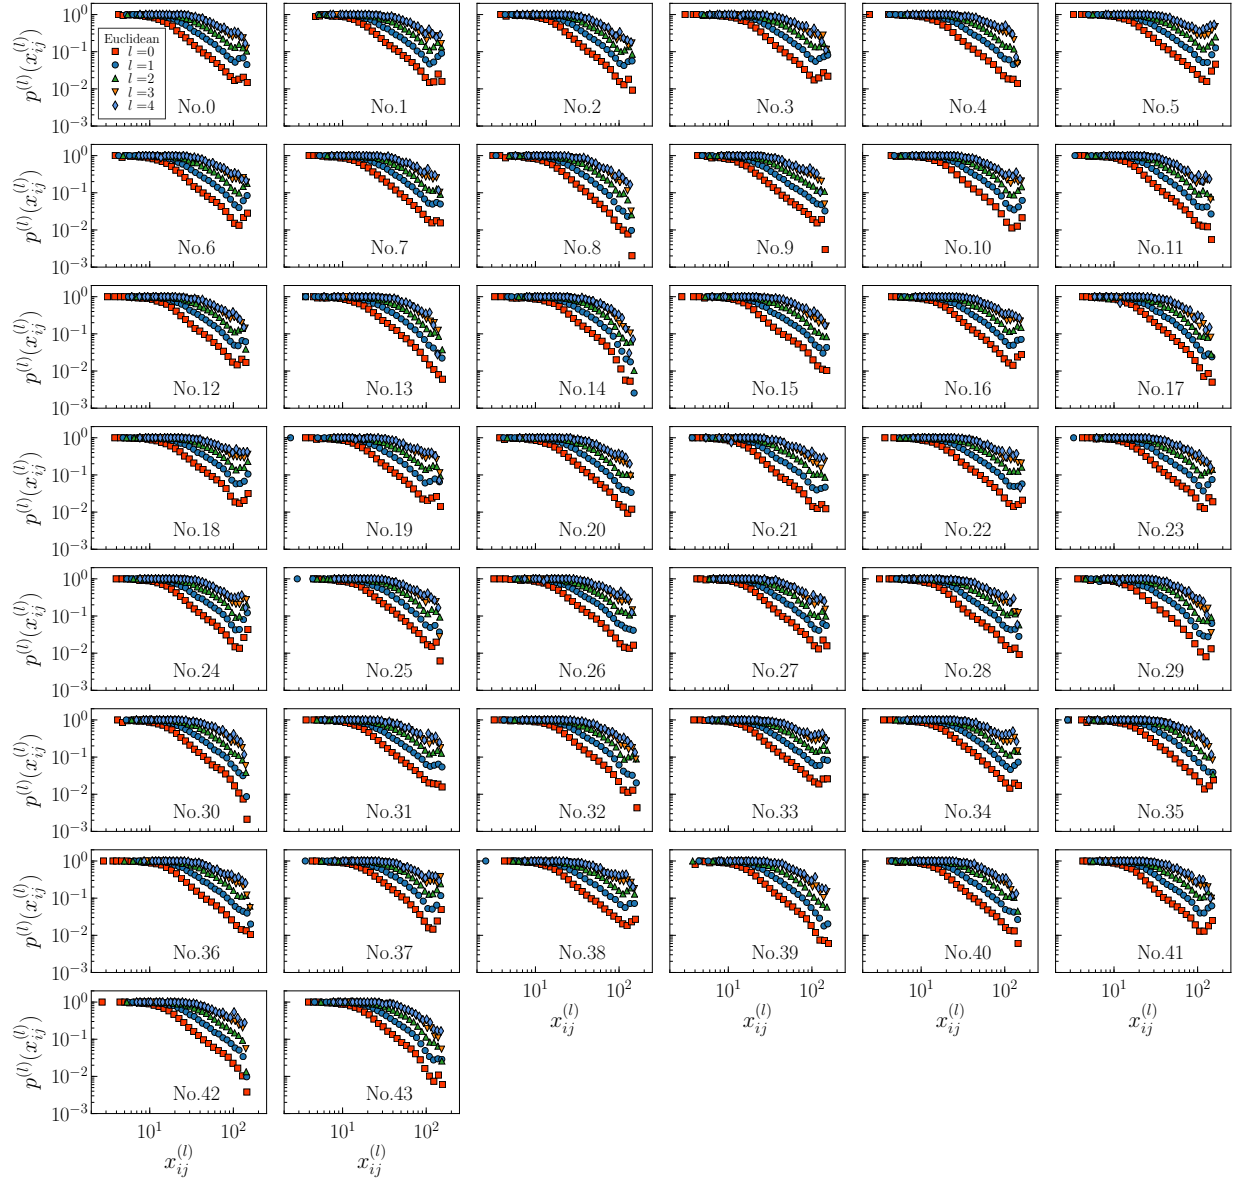

FIG. S35. Empirical connection probabilities  $p^{(l)}(x_{ij}^{(l)})$  for each subject in HCP dataset. The whole range of Euclidean distances  $x_{ij}$  is binned, and for each bin the ratio of the number of connected connectome pairs to the total number of connectome pairs falling within this bin is shown.

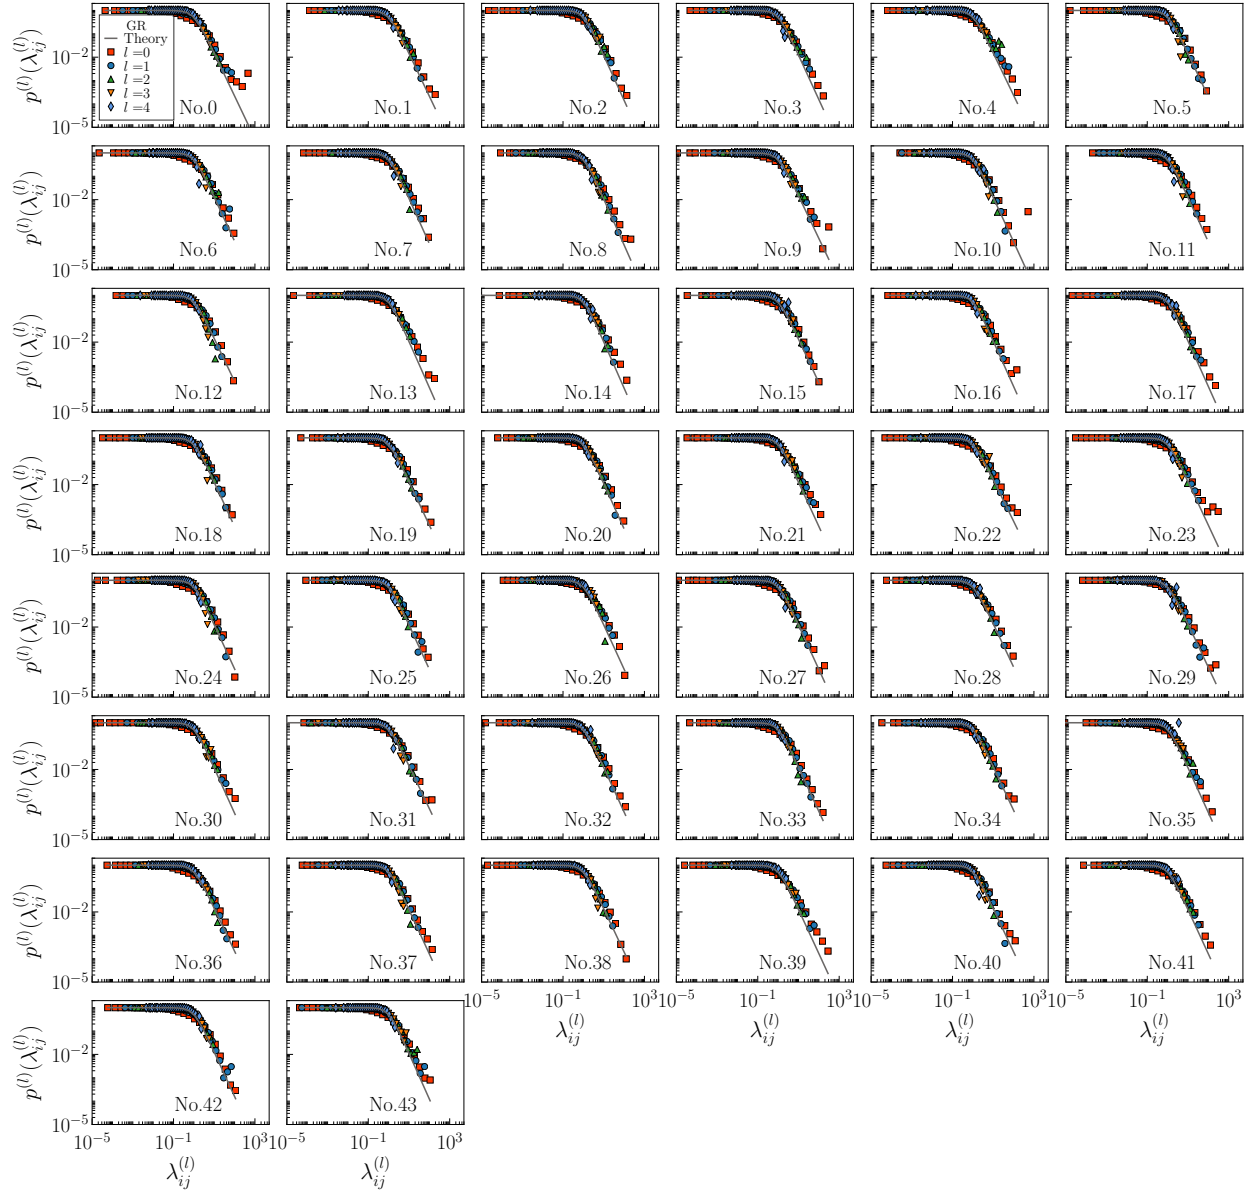

FIG. S36. Empirical versus theoretical connection probability  $p^{(l)}(\lambda_{ij}^{(l)})$  within a given range of  $\lambda_{ij}^{(l)}$  on GR shell for each subject in HCP dataset. Symbols are the connection probability of GR networks within a given range of  $\lambda_{ij}^{(l)}$  and the gray lines shows the theoretical curves.

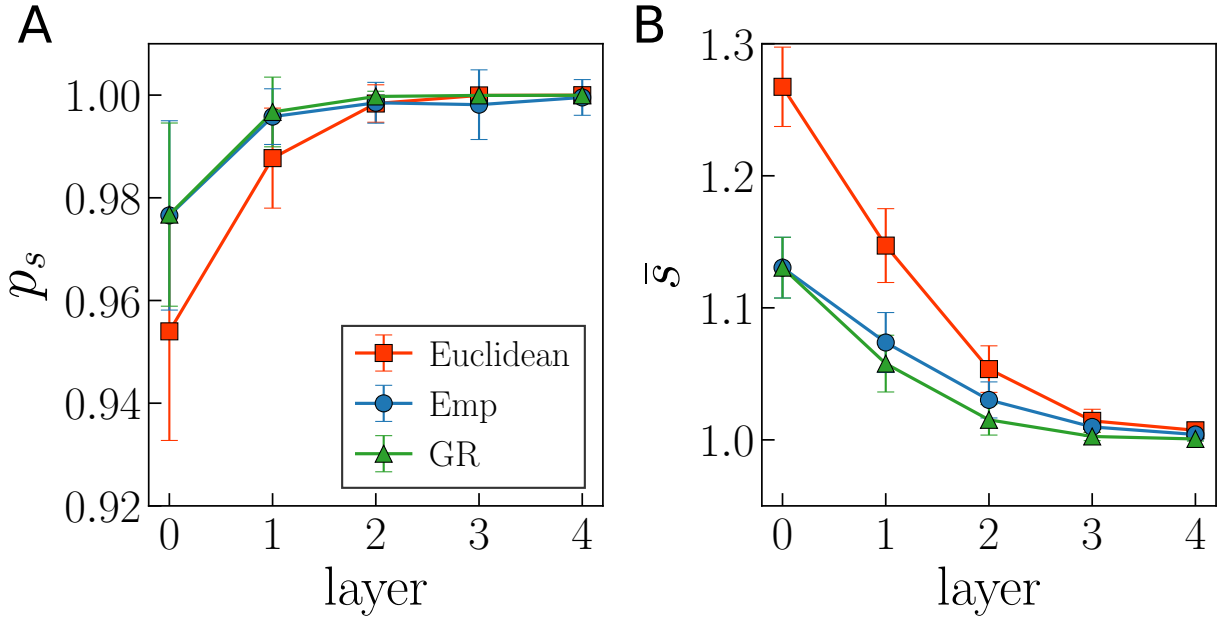

FIG. S37. Navigability of MH and GR maps at different resolutions. (A) average success rate (B) and average stretch for all HCP subjects. The error bars show the  $2\sigma$  confidence interval around the expected values.

### III. COMPARISON OF SIMILARITY DISTANCES WITH EUCLIDEAN DISTANCES AND HOMOPHILY

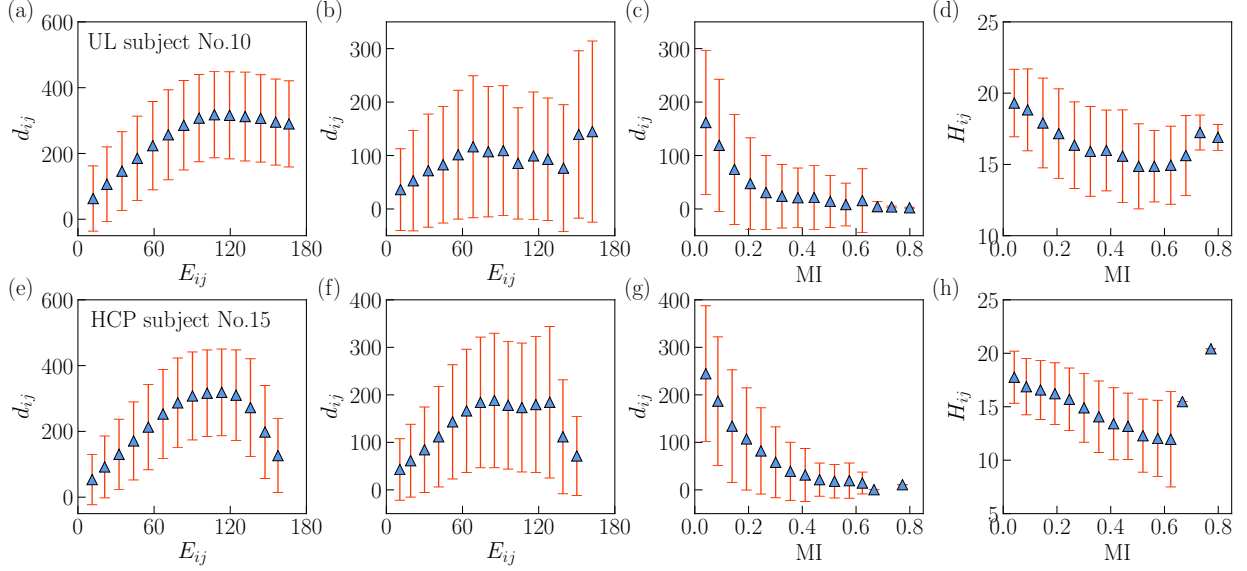

FIG. S38. **Similarity distance vs Euclidean distance and homophily.** (a)-(d) show results for subject No. 10 in the UL dataset and (e)-(h) for subject No. 15 in the HCP dataset. (a) and (e), Similarity distance ( $d_{ij} = R\Delta\theta_{ij}$ ) vs Euclidean distance ( $E_{ij}$ ) for all pairs of nodes in the connectome. (b) and (f), Similarity distance ( $d_{ij}$ ) vs Euclidean ( $E_{ij}$ ) for connected pairs of nodes. (c) and (g), similarity distance ( $d_{ij}$ ) vs matching index (MI). (d) and (h) hyperbolic distance ( $H_{ij}$ ) vs matching index (MI). The matching index is a normalized measure of overlap in two nodes' neighborhoods (ratio between the number of common neighbors and the total number of neighbors of the two discounting the pair), as defined in Ref. [3]. In each plot, we show a binned statistic with 15 equal-width bins. Each symbol shows the mean value in the bin and error bar indicates 1 standard deviation around the average value.

#### IV. STATISTICS FOR SUBJECTS IN THE UL AND THE HCP DATASETS

TABLE S1. Overview of the 40 connectomes in the UL dataset. The number of nodes ( $N$ ), the number of links ( $L$ ), the density of links ( $\rho_l = 2L/N(N-1)$ ), its average degree ( $\langle k \rangle = 2L/N$ ), the average local clustering coefficient ( $\langle c \rangle$ ), the average fiber length ( $f^{(l)}$  (mm)), and corresponding  $\pm 1$  standard error interval around the mean (SEM), the assortativity coefficient ( $r_c$ ), the modularity ( $Q$ ), the number of the communities ( $N_c$ ), and the hyperbolic embedding parameter  $\beta$  and  $\mu$ .

| Subject | Layer | $N$  | $L$   | $\rho_l$ | $\langle k \rangle \pm \text{SEM}$ | $\langle c \rangle \pm \text{SEM}$ | $f^{(l)} \pm \text{SEM}$ | $r_c$  | $Q$  | $N_c$ | $\beta$ | $\mu$ |
|---------|-------|------|-------|----------|------------------------------------|------------------------------------|--------------------------|--------|------|-------|---------|-------|
| No. 0   | 0     | 1009 | 14470 | 0.03     | 28.68±0.669                        | 0.43±0.005                         | 65.82±43.675             | -0.016 | 0.55 | 5     | 1.96    | 0.011 |
|         | 1     | 461  | 7177  | 0.07     | 31.14±0.825                        | 0.47±0.006                         | 68.82±44.082             | 0.005  | 0.48 | 5     | 2.22    | 0.011 |
|         | 2     | 233  | 3586  | 0.13     | 30.78±0.937                        | 0.50±0.008                         | 72.74±45.021             | 0.031  | 0.42 | 5     | 2.41    | 0.012 |
|         | 3     | 128  | 1744  | 0.21     | 27.25±1.031                        | 0.56±0.012                         | 74.80±46.285             | 0.040  | 0.32 | 3     | 2.63    | 0.014 |
|         | 4     | 82   | 962   | 0.29     | 23.46±1.102                        | 0.62±0.016                         | 74.39±47.996             | 0.021  | 0.31 | 3     | 3.08    | 0.018 |
| No. 1   | 0     | 1010 | 14406 | 0.03     | 28.53±0.729                        | 0.42±0.005                         | 66.38±44.958             | -0.003 | 0.52 | 5     | 1.93    | 0.011 |
|         | 1     | 461  | 7195  | 0.07     | 31.21±0.944                        | 0.46±0.006                         | 70.46±45.278             | 0.003  | 0.45 | 6     | 2.11    | 0.011 |
|         | 2     | 233  | 3893  | 0.14     | 33.42±1.158                        | 0.50±0.008                         | 76.44±46.113             | -0.012 | 0.35 | 3     | 2.26    | 0.011 |
|         | 3     | 128  | 1992  | 0.25     | 31.12±1.257                        | 0.57±0.010                         | 80.33±47.629             | -0.039 | 0.28 | 3     | 2.48    | 0.012 |
|         | 4     | 82   | 1129  | 0.34     | 27.54±1.328                        | 0.63±0.013                         | 83.11±50.287             | -0.080 | 0.23 | 4     | 2.78    | 0.015 |
| No. 2   | 0     | 1014 | 13671 | 0.03     | 26.96±0.638                        | 0.44±0.005                         | 62.45±42.759             | 0.008  | 0.58 | 6     | 2.00    | 0.012 |
|         | 1     | 462  | 6833  | 0.06     | 29.58±0.812                        | 0.46±0.006                         | 67.32±43.889             | 0.027  | 0.50 | 5     | 2.19    | 0.012 |
|         | 2     | 233  | 3599  | 0.13     | 30.89±0.954                        | 0.49±0.008                         | 73.01±45.070             | 0.056  | 0.42 | 4     | 2.41    | 0.012 |
|         | 3     | 128  | 1806  | 0.22     | 28.22±1.031                        | 0.55±0.011                         | 74.95±45.415             | 0.043  | 0.34 | 4     | 2.63    | 0.014 |
|         | 4     | 82   | 978   | 0.29     | 23.85±1.131                        | 0.63±0.015                         | 75.12±47.046             | -0.035 | 0.30 | 3     | 3.23    | 0.018 |
| No. 3   | 0     | 1011 | 12991 | 0.03     | 25.70±0.648                        | 0.41±0.005                         | 61.51±43.188             | 0.003  | 0.54 | 7     | 1.89    | 0.012 |
|         | 1     | 462  | 6642  | 0.06     | 28.75±0.842                        | 0.45±0.006                         | 64.32±43.813             | 0.029  | 0.46 | 4     | 2.08    | 0.011 |
|         | 2     | 233  | 3581  | 0.13     | 30.74±1.016                        | 0.49±0.008                         | 69.07±45.923             | 0.046  | 0.40 | 5     | 2.26    | 0.012 |
|         | 3     | 128  | 1888  | 0.23     | 29.50±1.135                        | 0.55±0.011                         | 74.38±49.242             | 0.049  | 0.31 | 3     | 2.48    | 0.013 |
|         | 4     | 82   | 1074  | 0.32     | 26.20±1.302                        | 0.63±0.015                         | 79.49±53.949             | 0.005  | 0.23 | 2     | 2.78    | 0.015 |
| No. 4   | 0     | 1014 | 15879 | 0.03     | 31.32±0.778                        | 0.41±0.005                         | 72.32±50.544             | 0.014  | 0.51 | 6     | 1.85    | 0.009 |
|         | 1     | 462  | 7896  | 0.07     | 34.18±0.999                        | 0.46±0.006                         | 76.98±52.410             | 0.036  | 0.44 | 4     | 2.08    | 0.010 |
|         | 2     | 233  | 4069  | 0.15     | 34.93±1.165                        | 0.50±0.008                         | 81.56±53.710             | 0.057  | 0.33 | 4     | 2.26    | 0.010 |
|         | 3     | 128  | 2077  | 0.26     | 32.45±1.254                        | 0.57±0.010                         | 83.79±54.812             | 0.042  | 0.29 | 3     | 2.63    | 0.012 |
|         | 4     | 82   | 1177  | 0.35     | 28.71±1.408                        | 0.66±0.013                         | 86.85±58.033             | -0.027 | 0.24 | 3     | 2.93    | 0.014 |
| No. 5   | 0     | 1014 | 14340 | 0.03     | 28.28±0.698                        | 0.41±0.005                         | 65.30±42.579             | -0.013 | 0.54 | 5     | 1.89    | 0.011 |
|         | 1     | 462  | 7175  | 0.07     | 31.06±0.900                        | 0.45±0.006                         | 69.23±43.346             | -0.003 | 0.44 | 5     | 2.11    | 0.011 |
|         | 2     | 233  | 3719  | 0.14     | 31.92±1.043                        | 0.48±0.007                         | 73.64±43.925             | 0.008  | 0.38 | 4     | 2.22    | 0.011 |
|         | 3     | 128  | 1919  | 0.24     | 29.98±1.141                        | 0.55±0.009                         | 76.85±45.317             | 0.004  | 0.30 | 4     | 2.48    | 0.013 |
|         | 4     | 82   | 1137  | 0.34     | 27.73±1.260                        | 0.63±0.012                         | 79.36±47.597             | -0.021 | 0.25 | 3     | 2.78    | 0.014 |
| No. 6   | 0     | 1013 | 12660 | 0.02     | 25.00±0.653                        | 0.44±0.005                         | 57.01±38.389             | -0.012 | 0.59 | 6     | 1.96    | 0.013 |
|         | 1     | 462  | 6519  | 0.06     | 28.22±0.865                        | 0.48±0.007                         | 61.16±39.025             | -0.006 | 0.50 | 5     | 2.26    | 0.013 |
|         | 2     | 233  | 3375  | 0.12     | 28.97±1.009                        | 0.53±0.009                         | 64.87±39.810             | -0.014 | 0.43 | 4     | 2.52    | 0.013 |
|         | 3     | 128  | 1712  | 0.21     | 26.75±1.080                        | 0.57±0.012                         | 68.31±41.896             | -0.014 | 0.33 | 3     | 2.78    | 0.015 |
|         | 4     | 82   | 1000  | 0.30     | 24.39±1.196                        | 0.62±0.015                         | 71.27±45.710             | -0.017 | 0.26 | 4     | 3.00    | 0.017 |
| No. 7   | 0     | 1014 | 13474 | 0.03     | 26.58±0.702                        | 0.42±0.005                         | 64.45±43.876             | -0.023 | 0.56 | 6     | 1.89    | 0.011 |
|         | 1     | 462  | 6955  | 0.07     | 30.11±0.902                        | 0.46±0.006                         | 68.69±45.530             | -0.012 | 0.47 | 4     | 2.11    | 0.011 |
|         | 2     | 233  | 3651  | 0.14     | 31.34±1.019                        | 0.50±0.007                         | 73.55±47.353             | -0.006 | 0.40 | 3     | 2.41    | 0.012 |
|         | 3     | 128  | 1934  | 0.24     | 30.22±1.079                        | 0.56±0.010                         | 78.72±50.132             | 0.000  | 0.32 | 4     | 2.63    | 0.013 |
|         | 4     | 82   | 1076  | 0.32     | 26.24±1.201                        | 0.62±0.014                         | 81.38±53.156             | -0.041 | 0.26 | 3     | 2.86    | 0.015 |

| Subject | Layer | $N$  | $L$   | $\rho_l$ | $\langle k \rangle \pm \text{SEM}$ | $\langle c \rangle \pm \text{SEM}$ | $f^{(l)} \pm \text{SEM}$ | $r_c$  | $Q$  | $N_c$ | $\beta$ | $\mu$ |
|---------|-------|------|-------|----------|------------------------------------|------------------------------------|--------------------------|--------|------|-------|---------|-------|
| No. 8   | 0     | 1002 | 13910 | 0.03     | 27.76±0.652                        | 0.41±0.005                         | 67.65±45.004             | 0.017  | 0.53 | 5     | 1.89    | 0.011 |
|         | 1     | 462  | 7041  | 0.07     | 30.48±0.845                        | 0.44±0.007                         | 72.07±46.547             | 0.051  | 0.43 | 4     | 2.04    | 0.011 |
|         | 2     | 233  | 3723  | 0.14     | 31.96±1.053                        | 0.49±0.008                         | 76.47±47.376             | 0.067  | 0.36 | 4     | 2.19    | 0.011 |
|         | 3     | 128  | 1960  | 0.24     | 30.62±1.177                        | 0.54±0.010                         | 82.08±50.685             | 0.056  | 0.28 | 3     | 2.41    | 0.012 |
|         | 4     | 82   | 1124  | 0.34     | 27.41±1.317                        | 0.62±0.013                         | 85.38±54.262             | 0.005  | 0.20 | 4     | 2.48    | 0.014 |
| No. 9   | 0     | 1010 | 13496 | 0.03     | 26.72±0.632                        | 0.41±0.005                         | 63.02±41.763             | -0.007 | 0.54 | 5     | 1.89    | 0.011 |
|         | 1     | 462  | 6658  | 0.06     | 28.82±0.802                        | 0.44±0.006                         | 66.13±42.236             | 0.000  | 0.47 | 4     | 2.08    | 0.011 |
|         | 2     | 233  | 3532  | 0.13     | 30.32±0.938                        | 0.48±0.008                         | 71.00±43.525             | 0.010  | 0.37 | 3     | 2.26    | 0.012 |
|         | 3     | 128  | 1774  | 0.22     | 27.72±1.022                        | 0.54±0.011                         | 74.12±45.548             | 0.004  | 0.31 | 3     | 2.56    | 0.014 |
|         | 4     | 82   | 977   | 0.29     | 23.83±1.147                        | 0.61±0.016                         | 76.36±47.999             | -0.052 | 0.27 | 4     | 2.78    | 0.017 |
| No. 10  | 0     | 1014 | 15222 | 0.03     | 30.02±0.675                        | 0.41±0.005                         | 71.29±48.238             | 0.004  | 0.57 | 6     | 1.96    | 0.010 |
|         | 1     | 462  | 7414  | 0.07     | 32.10±0.855                        | 0.46±0.006                         | 75.74±49.299             | 0.019  | 0.48 | 4     | 2.19    | 0.011 |
|         | 2     | 233  | 3754  | 0.14     | 32.22±0.943                        | 0.49±0.008                         | 79.97±50.254             | 0.043  | 0.39 | 4     | 2.34    | 0.011 |
|         | 3     | 128  | 1954  | 0.24     | 30.53±1.037                        | 0.54±0.010                         | 85.00±52.882             | 0.060  | 0.32 | 3     | 2.60    | 0.013 |
|         | 4     | 82   | 1102  | 0.33     | 26.88±1.213                        | 0.62±0.013                         | 87.45±57.162             | 0.015  | 0.26 | 3     | 2.78    | 0.015 |
| No. 11  | 0     | 1013 | 14695 | 0.03     | 29.01±0.702                        | 0.42±0.005                         | 63.42±42.951             | -0.030 | 0.54 | 6     | 1.93    | 0.011 |
|         | 1     | 462  | 7577  | 0.07     | 32.80±0.891                        | 0.46±0.007                         | 68.64±44.197             | -0.021 | 0.48 | 4     | 2.19    | 0.011 |
|         | 2     | 233  | 3872  | 0.14     | 33.24±1.000                        | 0.51±0.009                         | 72.30±44.861             | -0.010 | 0.43 | 3     | 2.48    | 0.011 |
|         | 3     | 128  | 2023  | 0.25     | 31.61±1.053                        | 0.58±0.011                         | 75.29±46.142             | 0.013  | 0.36 | 3     | 2.93    | 0.013 |
|         | 4     | 82   | 1088  | 0.33     | 26.54±1.146                        | 0.64±0.015                         | 74.97±47.933             | 0.002  | 0.32 | 3     | 3.45    | 0.016 |
| No. 12  | 0     | 1001 | 13933 | 0.03     | 27.84±0.663                        | 0.43±0.005                         | 74.40±57.807             | 0.044  | 0.57 | 7     | 1.96    | 0.011 |
|         | 1     | 460  | 7112  | 0.07     | 30.92±0.870                        | 0.46±0.006                         | 80.62±60.153             | 0.080  | 0.46 | 5     | 2.19    | 0.011 |
|         | 2     | 233  | 3655  | 0.14     | 31.37±1.031                        | 0.50±0.008                         | 86.96±62.239             | 0.081  | 0.38 | 4     | 2.34    | 0.012 |
|         | 3     | 128  | 1875  | 0.23     | 29.30±1.174                        | 0.58±0.011                         | 92.78±66.547             | 0.071  | 0.30 | 3     | 2.78    | 0.014 |
|         | 4     | 82   | 1049  | 0.32     | 25.59±1.368                        | 0.65±0.014                         | 96.71±71.598             | -0.014 | 0.26 | 3     | 3.08    | 0.016 |
| No. 13  | 0     | 1013 | 14409 | 0.03     | 28.45±0.771                        | 0.44±0.005                         | 64.03±43.296             | -0.011 | 0.54 | 6     | 1.93    | 0.011 |
|         | 1     | 462  | 7409  | 0.07     | 32.07±0.994                        | 0.47±0.006                         | 68.46±43.863             | 0.002  | 0.46 | 4     | 2.11    | 0.010 |
|         | 2     | 233  | 3845  | 0.14     | 33.00±1.143                        | 0.51±0.008                         | 72.39±43.825             | 0.009  | 0.38 | 5     | 2.34    | 0.011 |
|         | 3     | 128  | 2009  | 0.25     | 31.39±1.275                        | 0.57±0.010                         | 75.90±45.009             | -0.027 | 0.30 | 4     | 2.63    | 0.012 |
|         | 4     | 82   | 1163  | 0.35     | 28.37±1.400                        | 0.65±0.014                         | 77.41±46.731             | -0.087 | 0.24 | 4     | 2.78    | 0.014 |
| No. 14  | 0     | 1013 | 14959 | 0.03     | 29.53±0.713                        | 0.43±0.005                         | 67.63±45.728             | 0.001  | 0.53 | 5     | 1.96    | 0.011 |
|         | 1     | 462  | 7382  | 0.07     | 31.96±0.890                        | 0.46±0.007                         | 72.39±47.018             | 0.011  | 0.45 | 4     | 2.19    | 0.011 |
|         | 2     | 233  | 3808  | 0.14     | 32.69±1.025                        | 0.49±0.008                         | 76.85±47.985             | 0.013  | 0.38 | 3     | 2.34    | 0.011 |
|         | 3     | 128  | 1952  | 0.24     | 30.50±1.104                        | 0.55±0.010                         | 81.09±50.685             | 0.027  | 0.33 | 3     | 2.63    | 0.013 |
|         | 4     | 82   | 1071  | 0.32     | 26.12±1.264                        | 0.63±0.014                         | 84.18±54.978             | 0.014  | 0.26 | 3     | 3.08    | 0.016 |
| No. 15  | 0     | 1007 | 16208 | 0.03     | 32.19±0.749                        | 0.43±0.005                         | 76.68±53.253             | 0.001  | 0.54 | 5     | 1.96    | 0.010 |
|         | 1     | 462  | 8003  | 0.08     | 34.65±0.966                        | 0.47±0.006                         | 83.08±55.373             | 0.022  | 0.46 | 3     | 2.19    | 0.010 |
|         | 2     | 233  | 4102  | 0.15     | 35.21±1.119                        | 0.51±0.008                         | 88.97±57.472             | 0.043  | 0.40 | 4     | 2.41    | 0.011 |
|         | 3     | 128  | 2092  | 0.26     | 32.69±1.202                        | 0.58±0.011                         | 94.04±60.183             | 0.037  | 0.34 | 3     | 2.78    | 0.012 |
|         | 4     | 82   | 1150  | 0.35     | 28.05±1.384                        | 0.67±0.014                         | 97.63±65.524             | -0.025 | 0.27 | 3     | 3.26    | 0.015 |
| No. 16  | 0     | 1014 | 14539 | 0.03     | 28.68±0.738                        | 0.42±0.005                         | 68.14±46.715             | -0.004 | 0.55 | 5     | 1.89    | 0.010 |
|         | 1     | 462  | 7352  | 0.07     | 31.83±0.958                        | 0.46±0.006                         | 71.78±47.023             | 0.004  | 0.46 | 4     | 2.11    | 0.011 |
|         | 2     | 233  | 3801  | 0.14     | 32.63±1.124                        | 0.50±0.008                         | 76.22±48.008             | 0.014  | 0.38 | 3     | 2.34    | 0.011 |
|         | 3     | 128  | 1999  | 0.25     | 31.23±1.259                        | 0.57±0.010                         | 81.28±50.587             | 0.029  | 0.29 | 3     | 2.48    | 0.012 |
|         | 4     | 82   | 1198  | 0.36     | 29.22±1.448                        | 0.65±0.012                         | 86.73±55.434             | 0.015  | 0.22 | 3     | 2.78    | 0.014 |
| No. 17  | 0     | 1014 | 13901 | 0.03     | 27.42±0.683                        | 0.43±0.005                         | 62.44±43.569             | -0.011 | 0.55 | 6     | 1.96    | 0.011 |
|         | 1     | 462  | 7030  | 0.07     | 30.43±0.861                        | 0.46±0.006                         | 66.20±43.898             | -0.005 | 0.47 | 4     | 2.19    | 0.011 |
|         | 2     | 233  | 3642  | 0.13     | 31.26±0.987                        | 0.50±0.009                         | 70.61±44.926             | 0.001  | 0.39 | 3     | 2.34    | 0.012 |
|         | 3     | 128  | 1821  | 0.22     | 28.45±1.061                        | 0.55±0.011                         | 74.07±46.623             | 0.017  | 0.33 | 3     | 2.63    | 0.014 |
|         | 4     | 82   | 994   | 0.30     | 24.24±1.166                        | 0.61±0.015                         | 73.95±47.219             | -0.015 | 0.26 | 4     | 2.78    | 0.017 |
| No. 18  | 0     | 1014 | 12418 | 0.02     | 24.49±0.653                        | 0.43±0.005                         | 57.36±40.798             | -0.029 | 0.56 | 5     | 1.96    | 0.013 |
|         | 1     | 462  | 6510  | 0.06     | 28.18±0.837                        | 0.47±0.007                         | 62.05±41.924             | -0.024 | 0.51 | 4     | 2.22    | 0.012 |
|         | 2     | 233  | 3497  | 0.13     | 30.02±0.969                        | 0.51±0.008                         | 67.22±42.933             | -0.014 | 0.42 | 3     | 2.48    | 0.013 |
|         | 3     | 128  | 1847  | 0.23     | 28.86±1.052                        | 0.56±0.011                         | 71.59±44.098             | -0.025 | 0.34 | 4     | 2.78    | 0.014 |
|         | 4     | 82   | 1008  | 0.30     | 24.59±1.140                        | 0.62±0.015                         | 71.06±45.854             | -0.044 | 0.26 | 2     | 3.08    | 0.017 |

| Subject | Layer | $N$  | $L$   | $\rho_l$ | $\langle k \rangle \pm \text{SEM}$ | $\langle c \rangle \pm \text{SEM}$ | $f^{(l)} \pm \text{SEM}$ | $r_c$  | $Q$  | $N_c$ | $\beta$ | $\mu$ |
|---------|-------|------|-------|----------|------------------------------------|------------------------------------|--------------------------|--------|------|-------|---------|-------|
| No. 19  | 0     | 1011 | 14883 | 0.03     | 29.44±0.708                        | 0.40±0.005                         | 69.15±46.830             | 0.017  | 0.53 | 6     | 1.85    | 0.010 |
|         | 1     | 462  | 7633  | 0.07     | 33.04±0.932                        | 0.44±0.007                         | 74.46±49.017             | 0.033  | 0.45 | 4     | 2.04    | 0.010 |
|         | 2     | 233  | 4042  | 0.15     | 34.70±1.130                        | 0.49±0.008                         | 80.35±51.407             | 0.034  | 0.36 | 4     | 2.22    | 0.010 |
|         | 3     | 128  | 2032  | 0.25     | 31.75±1.246                        | 0.56±0.010                         | 84.05±54.276             | 0.033  | 0.27 | 3     | 2.48    | 0.012 |
|         | 4     | 82   | 1117  | 0.34     | 27.24±1.412                        | 0.64±0.013                         | 86.97±58.517             | -0.000 | 0.23 | 3     | 2.48    | 0.014 |
| No. 20  | 0     | 1011 | 13201 | 0.03     | 26.11±0.654                        | 0.42±0.005                         | 62.04±42.881             | -0.013 | 0.53 | 5     | 1.89    | 0.011 |
|         | 1     | 462  | 6749  | 0.06     | 29.22±0.852                        | 0.47±0.007                         | 66.28±43.375             | -0.008 | 0.49 | 4     | 2.19    | 0.012 |
|         | 2     | 233  | 3589  | 0.13     | 30.81±0.967                        | 0.49±0.008                         | 70.82±44.369             | 0.020  | 0.40 | 4     | 2.34    | 0.012 |
|         | 3     | 128  | 1816  | 0.22     | 28.38±1.037                        | 0.55±0.012                         | 72.81±44.735             | 0.021  | 0.33 | 4     | 2.63    | 0.014 |
|         | 4     | 82   | 975   | 0.29     | 23.78±1.170                        | 0.62±0.016                         | 74.04±46.391             | 0.002  | 0.26 | 2     | 2.93    | 0.017 |
| No. 21  | 0     | 1012 | 12004 | 0.02     | 23.72±0.636                        | 0.47±0.006                         | 55.45±38.946             | -0.044 | 0.59 | 6     | 2.08    | 0.014 |
|         | 1     | 462  | 6241  | 0.06     | 27.02±0.806                        | 0.50±0.007                         | 59.01±38.968             | -0.022 | 0.52 | 6     | 2.37    | 0.014 |
|         | 2     | 233  | 3200  | 0.12     | 27.47±0.923                        | 0.53±0.009                         | 62.35±39.676             | -0.020 | 0.42 | 3     | 2.63    | 0.014 |
|         | 3     | 128  | 1576  | 0.19     | 24.62±0.967                        | 0.56±0.013                         | 64.41±41.296             | 0.008  | 0.37 | 3     | 2.78    | 0.016 |
|         | 4     | 82   | 859   | 0.26     | 20.95±1.068                        | 0.62±0.017                         | 65.83±43.853             | 0.022  | 0.33 | 3     | 3.04    | 0.020 |
| No. 22  | 0     | 1014 | 13519 | 0.03     | 26.66±0.657                        | 0.42±0.005                         | 64.29±44.784             | -0.013 | 0.54 | 6     | 1.93    | 0.011 |
|         | 1     | 462  | 6669  | 0.06     | 28.87±0.819                        | 0.46±0.006                         | 67.28±45.278             | 0.002  | 0.50 | 5     | 2.17    | 0.012 |
|         | 2     | 233  | 3429  | 0.13     | 29.43±0.941                        | 0.49±0.008                         | 71.49±45.832             | 0.015  | 0.43 | 4     | 2.34    | 0.012 |
|         | 3     | 128  | 1758  | 0.22     | 27.47±0.982                        | 0.55±0.011                         | 74.21±47.045             | 0.023  | 0.36 | 3     | 2.63    | 0.014 |
|         | 4     | 82   | 989   | 0.30     | 24.12±1.079                        | 0.62±0.014                         | 76.73±49.833             | -0.028 | 0.32 | 3     | 3.15    | 0.017 |
| No. 23  | 0     | 1014 | 14709 | 0.03     | 29.01±0.701                        | 0.43±0.005                         | 70.15±50.763             | 0.006  | 0.57 | 5     | 1.96    | 0.011 |
|         | 1     | 462  | 7147  | 0.07     | 30.94±0.887                        | 0.47±0.006                         | 75.22±52.027             | 0.017  | 0.48 | 4     | 2.19    | 0.011 |
|         | 2     | 233  | 3783  | 0.14     | 32.47±1.059                        | 0.51±0.008                         | 81.64±53.650             | 0.036  | 0.40 | 4     | 2.41    | 0.011 |
|         | 3     | 128  | 1864  | 0.23     | 29.12±1.148                        | 0.57±0.012                         | 85.15±56.933             | 0.022  | 0.33 | 4     | 2.71    | 0.014 |
|         | 4     | 82   | 1031  | 0.31     | 25.15±1.288                        | 0.65±0.015                         | 85.76±59.914             | -0.047 | 0.28 | 3     | 3.23    | 0.017 |
| No. 24  | 0     | 1014 | 13661 | 0.03     | 26.94±0.660                        | 0.40±0.005                         | 63.30±40.449             | -0.005 | 0.54 | 5     | 1.85    | 0.011 |
|         | 1     | 462  | 6868  | 0.06     | 29.73±0.849                        | 0.45±0.006                         | 66.30±40.190             | 0.009  | 0.47 | 4     | 2.08    | 0.011 |
|         | 2     | 233  | 3587  | 0.13     | 30.79±0.970                        | 0.48±0.008                         | 69.28±40.086             | 0.031  | 0.40 | 4     | 2.22    | 0.011 |
|         | 3     | 128  | 1858  | 0.23     | 29.03±1.072                        | 0.53±0.010                         | 72.08±42.551             | 0.029  | 0.33 | 3     | 2.41    | 0.013 |
|         | 4     | 82   | 1033  | 0.31     | 25.20±1.216                        | 0.61±0.014                         | 73.88±45.514             | -0.036 | 0.28 | 3     | 2.78    | 0.016 |
| No. 25  | 0     | 1013 | 14802 | 0.03     | 29.22±0.737                        | 0.44±0.005                         | 69.53±50.198             | 0.015  | 0.52 | 6     | 1.96    | 0.011 |
|         | 1     | 462  | 7428  | 0.07     | 32.16±0.979                        | 0.47±0.006                         | 75.38±52.684             | 0.012  | 0.43 | 5     | 2.15    | 0.011 |
|         | 2     | 233  | 3893  | 0.14     | 33.42±1.185                        | 0.51±0.008                         | 81.90±55.150             | -0.002 | 0.36 | 5     | 2.26    | 0.011 |
|         | 3     | 128  | 2039  | 0.25     | 31.86±1.297                        | 0.56±0.011                         | 88.28±59.237             | -0.010 | 0.27 | 4     | 2.48    | 0.012 |
|         | 4     | 82   | 1200  | 0.36     | 29.27±1.422                        | 0.64±0.014                         | 93.61±63.824             | -0.050 | 0.20 | 3     | 2.63    | 0.013 |
| No. 26  | 0     | 1013 | 12942 | 0.03     | 25.55±0.673                        | 0.44±0.005                         | 56.78±40.265             | -0.020 | 0.55 | 5     | 1.96    | 0.012 |
|         | 1     | 462  | 6709  | 0.06     | 29.04±0.857                        | 0.47±0.007                         | 61.63±41.598             | 0.000  | 0.49 | 5     | 2.19    | 0.012 |
|         | 2     | 233  | 3445  | 0.13     | 29.57±0.995                        | 0.51±0.009                         | 66.80±43.586             | 0.009  | 0.41 | 4     | 2.41    | 0.013 |
|         | 3     | 128  | 1732  | 0.21     | 27.06±1.056                        | 0.55±0.012                         | 69.83±46.121             | 0.004  | 0.31 | 3     | 2.63    | 0.014 |
|         | 4     | 82   | 975   | 0.29     | 23.78±1.176                        | 0.62±0.015                         | 72.24±50.272             | -0.008 | 0.26 | 3     | 2.93    | 0.017 |
| No. 27  | 0     | 1014 | 12483 | 0.02     | 24.62±0.619                        | 0.40±0.005                         | 60.51±41.126             | -0.004 | 0.51 | 5     | 1.85    | 0.012 |
|         | 1     | 462  | 6352  | 0.06     | 27.50±0.798                        | 0.44±0.006                         | 62.96±41.281             | 0.009  | 0.46 | 4     | 2.08    | 0.012 |
|         | 2     | 233  | 3308  | 0.12     | 28.39±0.946                        | 0.47±0.008                         | 67.63±42.449             | 0.018  | 0.40 | 5     | 2.22    | 0.012 |
|         | 3     | 128  | 1766  | 0.22     | 27.59±1.051                        | 0.54±0.011                         | 71.06±44.524             | 0.034  | 0.33 | 4     | 2.48    | 0.014 |
|         | 4     | 82   | 981   | 0.30     | 23.93±1.179                        | 0.61±0.015                         | 73.43±47.249             | -0.021 | 0.29 | 3     | 2.78    | 0.017 |
| No. 28  | 0     | 1012 | 14812 | 0.03     | 29.27±0.774                        | 0.43±0.005                         | 71.18±52.646             | 0.000  | 0.53 | 6     | 1.93    | 0.010 |
|         | 1     | 462  | 7440  | 0.07     | 32.21±1.024                        | 0.48±0.007                         | 76.57±54.983             | -0.001 | 0.44 | 5     | 2.19    | 0.011 |
|         | 2     | 233  | 3995  | 0.15     | 34.29±1.243                        | 0.52±0.009                         | 84.86±59.155             | -0.012 | 0.35 | 4     | 2.34    | 0.011 |
|         | 3     | 128  | 2039  | 0.25     | 31.86±1.333                        | 0.58±0.012                         | 90.38±61.600             | -0.026 | 0.27 | 3     | 2.56    | 0.012 |
|         | 4     | 82   | 1151  | 0.35     | 28.07±1.442                        | 0.65±0.015                         | 95.31±65.566             | -0.039 | 0.22 | 3     | 2.78    | 0.014 |
| No. 29  | 0     | 1012 | 13601 | 0.03     | 26.88±0.670                        | 0.43±0.005                         | 62.88±41.839             | -0.016 | 0.58 | 6     | 1.96    | 0.012 |
|         | 1     | 462  | 6998  | 0.07     | 30.29±0.852                        | 0.46±0.006                         | 67.22±42.522             | -0.010 | 0.48 | 4     | 2.19    | 0.011 |
|         | 2     | 233  | 3694  | 0.14     | 31.71±0.952                        | 0.50±0.008                         | 71.09±42.622             | -0.000 | 0.39 | 3     | 2.41    | 0.012 |
|         | 3     | 128  | 1813  | 0.22     | 28.33±1.011                        | 0.57±0.011                         | 72.42±43.307             | 0.021  | 0.36 | 3     | 2.78    | 0.014 |
|         | 4     | 82   | 966   | 0.29     | 23.56±1.116                        | 0.64±0.016                         | 73.09±45.577             | -0.002 | 0.33 | 3     | 3.38    | 0.018 |



| Subject | Layer | $N$  | $L$   | $\rho_l$ | $\langle k \rangle \pm \text{SEM}$ | $\langle c \rangle \pm \text{SEM}$ | $f^{(l)} \pm \text{SEM}$ | $r_c$  | $Q$  | $N_c$ | $\beta$ | $\mu$ |
|---------|-------|------|-------|----------|------------------------------------|------------------------------------|--------------------------|--------|------|-------|---------|-------|
| No. 30  | 0     | 1013 | 14177 | 0.03     | 27.99±0.711                        | 0.43±0.005                         | 67.36±47.975             | -0.008 | 0.55 | 5     | 1.96    | 0.011 |
|         | 1     | 462  | 7246  | 0.07     | 31.37±0.911                        | 0.46±0.006                         | 72.35±49.696             | 0.022  | 0.47 | 5     | 2.15    | 0.011 |
|         | 2     | 233  | 3778  | 0.14     | 32.43±1.067                        | 0.50±0.008                         | 77.23±50.352             | 0.016  | 0.38 | 3     | 2.32    | 0.011 |
|         | 3     | 128  | 1960  | 0.24     | 30.62±1.130                        | 0.56±0.011                         | 81.62±52.396             | 0.028  | 0.33 | 3     | 2.63    | 0.013 |
|         | 4     | 82   | 1131  | 0.34     | 27.59±1.287                        | 0.65±0.014                         | 84.91±56.072             | -0.004 | 0.28 | 3     | 3.08    | 0.015 |
| No. 31  | 0     | 1014 | 15641 | 0.03     | 30.85±0.760                        | 0.41±0.005                         | 71.71±51.033             | 0.014  | 0.55 | 6     | 1.85    | 0.009 |
|         | 1     | 462  | 7983  | 0.07     | 34.56±0.994                        | 0.46±0.006                         | 77.72±54.036             | 0.026  | 0.47 | 4     | 2.11    | 0.010 |
|         | 2     | 233  | 4220  | 0.16     | 36.22±1.132                        | 0.50±0.007                         | 83.75±57.298             | 0.051  | 0.38 | 4     | 2.34    | 0.010 |
|         | 3     | 128  | 2141  | 0.26     | 33.45±1.216                        | 0.56±0.010                         | 88.56±59.873             | 0.032  | 0.30 | 3     | 2.56    | 0.011 |
|         | 4     | 82   | 1231  | 0.37     | 30.02±1.386                        | 0.63±0.012                         | 94.13±65.808             | 0.002  | 0.21 | 3     | 2.48    | 0.013 |
| No. 32  | 0     | 1013 | 12875 | 0.03     | 25.42±0.673                        | 0.43±0.005                         | 62.54±46.293             | -0.001 | 0.57 | 6     | 1.96    | 0.012 |
|         | 1     | 462  | 6409  | 0.06     | 27.74±0.867                        | 0.48±0.007                         | 66.40±47.918             | 0.009  | 0.48 | 6     | 2.22    | 0.013 |
|         | 2     | 233  | 3351  | 0.12     | 28.76±1.052                        | 0.50±0.009                         | 73.08±51.161             | 0.034  | 0.37 | 4     | 2.26    | 0.012 |
|         | 3     | 128  | 1795  | 0.22     | 28.05±1.174                        | 0.55±0.011                         | 78.25±53.290             | 0.028  | 0.28 | 4     | 2.41    | 0.013 |
|         | 4     | 82   | 1031  | 0.31     | 25.15±1.271                        | 0.62±0.015                         | 80.85±55.859             | 0.005  | 0.25 | 3     | 2.78    | 0.016 |
| No. 33  | 0     | 1014 | 14510 | 0.03     | 28.62±0.714                        | 0.44±0.005                         | 66.73±46.049             | -0.008 | 0.53 | 5     | 1.96    | 0.011 |
|         | 1     | 462  | 7427  | 0.07     | 32.15±0.929                        | 0.47±0.007                         | 71.73±46.530             | 0.002  | 0.46 | 4     | 2.19    | 0.011 |
|         | 2     | 233  | 3876  | 0.14     | 33.27±1.066                        | 0.50±0.008                         | 77.93±47.755             | 0.009  | 0.38 | 3     | 2.34    | 0.011 |
|         | 3     | 128  | 2004  | 0.25     | 31.31±1.138                        | 0.56±0.010                         | 81.38±49.065             | 0.016  | 0.32 | 3     | 2.63    | 0.012 |
|         | 4     | 82   | 1106  | 0.33     | 26.98±1.292                        | 0.64±0.015                         | 82.64±51.067             | -0.043 | 0.26 | 3     | 3.08    | 0.015 |
| No. 34  | 0     | 1012 | 14344 | 0.03     | 28.35±0.706                        | 0.41±0.005                         | 69.04±45.713             | -0.001 | 0.53 | 5     | 1.85    | 0.010 |
|         | 1     | 461  | 7292  | 0.07     | 31.64±0.904                        | 0.45±0.006                         | 73.20±45.988             | 0.020  | 0.47 | 5     | 2.04    | 0.010 |
|         | 2     | 233  | 3814  | 0.14     | 32.74±1.025                        | 0.48±0.007                         | 78.36±47.041             | 0.035  | 0.38 | 4     | 2.19    | 0.011 |
|         | 3     | 128  | 1921  | 0.24     | 30.02±1.047                        | 0.54±0.011                         | 81.64±48.906             | 0.024  | 0.31 | 4     | 2.56    | 0.013 |
|         | 4     | 82   | 1053  | 0.32     | 25.68±1.197                        | 0.63±0.015                         | 81.33±50.079             | -0.015 | 0.28 | 3     | 3.08    | 0.016 |
| No. 35  | 0     | 1009 | 12460 | 0.02     | 24.70±0.665                        | 0.42±0.005                         | 59.69±41.052             | -0.001 | 0.54 | 6     | 1.89    | 0.012 |
|         | 1     | 462  | 6467  | 0.06     | 28.00±0.867                        | 0.46±0.006                         | 64.31±42.744             | 0.012  | 0.45 | 5     | 2.11    | 0.012 |
|         | 2     | 233  | 3439  | 0.13     | 29.52±1.035                        | 0.50±0.008                         | 69.39±43.860             | 0.012  | 0.39 | 5     | 2.34    | 0.012 |
|         | 3     | 128  | 1808  | 0.22     | 28.25±1.136                        | 0.55±0.010                         | 74.81±46.898             | 0.015  | 0.31 | 3     | 2.48    | 0.013 |
|         | 4     | 82   | 1064  | 0.32     | 25.95±1.276                        | 0.61±0.014                         | 79.37±50.431             | -0.040 | 0.23 | 3     | 2.48    | 0.015 |
| No. 36  | 0     | 1014 | 13978 | 0.03     | 27.57±0.693                        | 0.43±0.005                         | 66.11±45.586             | -0.011 | 0.55 | 6     | 1.96    | 0.011 |
|         | 1     | 462  | 7053  | 0.07     | 30.53±0.891                        | 0.47±0.007                         | 70.12±46.290             | -0.006 | 0.49 | 4     | 2.19    | 0.011 |
|         | 2     | 233  | 3775  | 0.14     | 32.40±1.052                        | 0.50±0.008                         | 74.40±46.276             | -0.004 | 0.40 | 3     | 2.34    | 0.011 |
|         | 3     | 128  | 1915  | 0.24     | 29.92±1.157                        | 0.55±0.011                         | 77.52±48.562             | 0.009  | 0.32 | 3     | 2.48    | 0.013 |
|         | 4     | 82   | 1083  | 0.33     | 26.41±1.288                        | 0.63±0.015                         | 78.34±51.617             | -0.034 | 0.22 | 2     | 2.93    | 0.016 |
| No. 37  | 0     | 1014 | 14282 | 0.03     | 28.17±0.693                        | 0.40±0.005                         | 64.59±43.099             | -0.004 | 0.54 | 5     | 1.88    | 0.011 |
|         | 1     | 462  | 7216  | 0.07     | 31.24±0.898                        | 0.45±0.006                         | 68.52±43.720             | -0.006 | 0.44 | 4     | 2.11    | 0.011 |
|         | 2     | 233  | 3783  | 0.14     | 32.47±1.036                        | 0.49±0.008                         | 73.59±44.947             | -0.009 | 0.39 | 4     | 2.30    | 0.011 |
|         | 3     | 128  | 1940  | 0.24     | 30.31±1.132                        | 0.55±0.010                         | 77.60±47.272             | -0.024 | 0.27 | 3     | 2.52    | 0.013 |
|         | 4     | 82   | 1105  | 0.33     | 26.95±1.282                        | 0.62±0.013                         | 82.25±52.116             | -0.044 | 0.25 | 3     | 2.71    | 0.015 |
| No. 38  | 0     | 1011 | 14001 | 0.03     | 27.70±0.679                        | 0.43±0.005                         | 68.35±47.067             | 0.025  | 0.53 | 6     | 1.93    | 0.011 |
|         | 1     | 462  | 7129  | 0.07     | 30.86±0.909                        | 0.46±0.006                         | 74.59±49.171             | 0.040  | 0.45 | 5     | 2.08    | 0.011 |
|         | 2     | 233  | 3788  | 0.14     | 32.52±1.086                        | 0.49±0.008                         | 80.76±51.217             | 0.045  | 0.38 | 4     | 2.26    | 0.011 |
|         | 3     | 128  | 1952  | 0.24     | 30.50±1.235                        | 0.55±0.010                         | 86.29±54.329             | 0.033  | 0.28 | 4     | 2.34    | 0.012 |
|         | 4     | 82   | 1115  | 0.34     | 27.20±1.378                        | 0.62±0.012                         | 90.79±59.115             | -0.019 | 0.21 | 4     | 2.48    | 0.014 |
| No. 39  | 0     | 1013 | 12599 | 0.02     | 24.87±0.695                        | 0.44±0.005                         | 60.71±40.883             | -0.031 | 0.56 | 5     | 1.96    | 0.013 |
|         | 1     | 462  | 6468  | 0.06     | 28.00±0.902                        | 0.47±0.007                         | 63.92±40.596             | -0.028 | 0.49 | 5     | 2.19    | 0.012 |
|         | 2     | 233  | 3433  | 0.13     | 29.47±1.053                        | 0.50±0.008                         | 68.99±41.314             | -0.027 | 0.42 | 5     | 2.34    | 0.012 |
|         | 3     | 128  | 1808  | 0.22     | 28.25±1.162                        | 0.57±0.011                         | 72.21±42.214             | -0.027 | 0.30 | 3     | 2.71    | 0.014 |
|         | 4     | 82   | 1026  | 0.31     | 25.02±1.262                        | 0.63±0.015                         | 74.63±44.861             | -0.075 | 0.25 | 3     | 2.93    | 0.016 |

TABLE S2. Overview of the 44 connectomes in the HCP dataset. The number of nodes ( $N$ ), the number of links ( $L$ ), the density of links ( $\rho_l = 2L/N(N-1)$ ), its average degree ( $\langle k \rangle = 2L/N$ ), the average local clustering coefficient ( $\langle c \rangle$ ), the average fiber length ( $f^{(l)}$  (mm)), and corresponding  $\pm 1$  standard error interval around the mean (SEM), the assortativity coefficient ( $r_c$ ), the modularity ( $Q$ ), the number of the communities ( $N_c$ ), and the hyperbolic embedding parameter  $\beta$  and  $\mu$ .

| Subject | Layer | $N$  | $L$   | $\rho_l$ | $\langle k \rangle \pm \text{SEM}$ | $\langle c \rangle \pm \text{SEM}$ | $f^{(l)} \pm \text{SEM}$ | $r_c$  | $Q$  | $N_c$ | $\beta$ | $\mu$ |
|---------|-------|------|-------|----------|------------------------------------|------------------------------------|--------------------------|--------|------|-------|---------|-------|
| No. 0   | 0     | 1014 | 37910 | 0.07     | 74.77 $\pm$ 1.509                  | 0.41 $\pm$ 0.004                   | 58.31 $\pm$ 43.175       | -0.021 | 0.40 | 5     | 1.83    | 0.004 |
|         | 1     | 462  | 18024 | 0.17     | 78.03 $\pm$ 1.758                  | 0.47 $\pm$ 0.004                   | 66.92 $\pm$ 44.813       | -0.005 | 0.33 | 3     | 2.02    | 0.004 |
|         | 2     | 233  | 8540  | 0.32     | 73.30 $\pm$ 1.765                  | 0.55 $\pm$ 0.006                   | 73.51 $\pm$ 45.896       | -0.016 | 0.25 | 3     | 2.19    | 0.005 |
|         | 3     | 128  | 3871  | 0.48     | 60.48 $\pm$ 1.617                  | 0.65 $\pm$ 0.007                   | 78.20 $\pm$ 47.528       | -0.052 | 0.19 | 3     | 3.02    | 0.007 |
|         | 4     | 82   | 1873  | 0.56     | 45.68 $\pm$ 1.591                  | 0.74 $\pm$ 0.010                   | 77.00 $\pm$ 49.433       | -0.098 | 0.15 | 2     | 3.58    | 0.010 |
| No. 1   | 0     | 1014 | 39210 | 0.08     | 77.34 $\pm$ 1.661                  | 0.42 $\pm$ 0.004                   | 60.77 $\pm$ 44.773       | -0.036 | 0.39 | 3     | 1.83    | 0.004 |
|         | 1     | 462  | 18776 | 0.18     | 81.28 $\pm$ 1.910                  | 0.48 $\pm$ 0.005                   | 69.51 $\pm$ 45.948       | -0.035 | 0.33 | 3     | 2.00    | 0.004 |
|         | 2     | 233  | 8875  | 0.33     | 76.18 $\pm$ 1.851                  | 0.57 $\pm$ 0.006                   | 76.93 $\pm$ 47.307       | -0.041 | 0.26 | 3     | 2.37    | 0.005 |
|         | 3     | 128  | 4029  | 0.50     | 62.95 $\pm$ 1.608                  | 0.67 $\pm$ 0.006                   | 82.16 $\pm$ 48.826       | -0.047 | 0.19 | 2     | 2.67    | 0.006 |
|         | 4     | 82   | 1990  | 0.60     | 48.54 $\pm$ 1.531                  | 0.75 $\pm$ 0.008                   | 81.97 $\pm$ 50.412       | -0.090 | 0.15 | 2     | 3.61    | 0.009 |
| No. 2   | 0     | 1014 | 39609 | 0.08     | 78.12 $\pm$ 1.539                  | 0.42 $\pm$ 0.004                   | 56.38 $\pm$ 40.686       | -0.028 | 0.38 | 4     | 1.92    | 0.004 |
|         | 1     | 462  | 18603 | 0.17     | 80.53 $\pm$ 1.754                  | 0.48 $\pm$ 0.005                   | 64.62 $\pm$ 41.902       | -0.025 | 0.33 | 3     | 2.16    | 0.004 |
|         | 2     | 233  | 8671  | 0.32     | 74.43 $\pm$ 1.710                  | 0.57 $\pm$ 0.005                   | 71.26 $\pm$ 43.164       | -0.023 | 0.27 | 3     | 2.54    | 0.005 |
|         | 3     | 128  | 3791  | 0.47     | 59.23 $\pm$ 1.545                  | 0.66 $\pm$ 0.007                   | 75.33 $\pm$ 44.626       | -0.036 | 0.22 | 2     | 3.60    | 0.007 |
|         | 4     | 82   | 1857  | 0.56     | 45.29 $\pm$ 1.419                  | 0.73 $\pm$ 0.009                   | 74.19 $\pm$ 45.822       | -0.073 | 0.18 | 2     | 3.82    | 0.010 |
| No. 3   | 0     | 1014 | 40309 | 0.08     | 79.50 $\pm$ 1.711                  | 0.44 $\pm$ 0.004                   | 58.96 $\pm$ 43.097       | -0.041 | 0.41 | 4     | 1.91    | 0.004 |
|         | 1     | 462  | 19158 | 0.18     | 82.94 $\pm$ 1.965                  | 0.49 $\pm$ 0.005                   | 68.01 $\pm$ 44.740       | -0.041 | 0.32 | 3     | 2.02    | 0.004 |
|         | 2     | 233  | 9033  | 0.33     | 77.54 $\pm$ 1.903                  | 0.58 $\pm$ 0.006                   | 75.47 $\pm$ 46.003       | -0.054 | 0.23 | 3     | 2.39    | 0.005 |
|         | 3     | 128  | 4078  | 0.50     | 63.72 $\pm$ 1.660                  | 0.68 $\pm$ 0.007                   | 80.71 $\pm$ 48.110       | -0.062 | 0.18 | 2     | 2.92    | 0.006 |
|         | 4     | 82   | 1986  | 0.60     | 48.44 $\pm$ 1.512                  | 0.75 $\pm$ 0.009                   | 80.13 $\pm$ 49.525       | -0.097 | 0.13 | 2     | 3.70    | 0.009 |
| No. 4   | 0     | 1014 | 43276 | 0.08     | 85.36 $\pm$ 1.687                  | 0.41 $\pm$ 0.004                   | 57.41 $\pm$ 41.454       | -0.040 | 0.41 | 4     | 1.81    | 0.003 |
|         | 1     | 462  | 20470 | 0.19     | 88.61 $\pm$ 1.886                  | 0.47 $\pm$ 0.004                   | 66.27 $\pm$ 43.139       | -0.033 | 0.32 | 4     | 1.97    | 0.004 |
|         | 2     | 233  | 9609  | 0.36     | 82.48 $\pm$ 1.812                  | 0.57 $\pm$ 0.005                   | 73.54 $\pm$ 44.661       | -0.043 | 0.23 | 3     | 2.37    | 0.004 |
|         | 3     | 128  | 4431  | 0.55     | 69.23 $\pm$ 1.575                  | 0.68 $\pm$ 0.005                   | 79.81 $\pm$ 46.430       | -0.042 | 0.14 | 3     | 3.08    | 0.006 |
|         | 4     | 82   | 2142  | 0.64     | 52.24 $\pm$ 1.520                  | 0.77 $\pm$ 0.006                   | 80.09 $\pm$ 48.261       | -0.065 | 0.12 | 2     | 3.20    | 0.008 |
| No. 5   | 0     | 1014 | 40165 | 0.08     | 79.22 $\pm$ 1.546                  | 0.41 $\pm$ 0.004                   | 63.63 $\pm$ 45.504       | -0.032 | 0.42 | 4     | 1.85    | 0.004 |
|         | 1     | 462  | 19100 | 0.18     | 82.68 $\pm$ 1.769                  | 0.47 $\pm$ 0.005                   | 71.98 $\pm$ 46.051       | -0.032 | 0.34 | 3     | 2.06    | 0.004 |
|         | 2     | 233  | 9093  | 0.34     | 78.05 $\pm$ 1.721                  | 0.56 $\pm$ 0.005                   | 79.75 $\pm$ 47.253       | -0.041 | 0.26 | 3     | 2.52    | 0.005 |
|         | 3     | 128  | 4114  | 0.51     | 64.28 $\pm$ 1.550                  | 0.67 $\pm$ 0.006                   | 84.40 $\pm$ 48.945       | -0.059 | 0.18 | 3     | 3.13    | 0.007 |
|         | 4     | 82   | 2033  | 0.61     | 49.59 $\pm$ 1.454                  | 0.75 $\pm$ 0.008                   | 84.01 $\pm$ 51.240       | -0.095 | 0.14 | 2     | 4.31    | 0.009 |
| No. 6   | 0     | 1014 | 39638 | 0.08     | 78.18 $\pm$ 1.571                  | 0.42 $\pm$ 0.004                   | 57.13 $\pm$ 41.277       | -0.042 | 0.42 | 4     | 1.89    | 0.004 |
|         | 1     | 462  | 18692 | 0.18     | 80.92 $\pm$ 1.784                  | 0.48 $\pm$ 0.005                   | 65.01 $\pm$ 42.186       | -0.042 | 0.34 | 3     | 2.10    | 0.004 |
|         | 2     | 233  | 8821  | 0.33     | 75.72 $\pm$ 1.749                  | 0.57 $\pm$ 0.006                   | 71.37 $\pm$ 43.120       | -0.048 | 0.27 | 3     | 2.53    | 0.005 |
|         | 3     | 128  | 3958  | 0.49     | 61.84 $\pm$ 1.562                  | 0.66 $\pm$ 0.007                   | 75.59 $\pm$ 44.708       | -0.054 | 0.19 | 3     | 2.84    | 0.007 |
|         | 4     | 82   | 1942  | 0.58     | 47.37 $\pm$ 1.481                  | 0.74 $\pm$ 0.009                   | 75.67 $\pm$ 46.882       | -0.094 | 0.14 | 3     | 2.81    | 0.008 |
| No. 7   | 0     | 1014 | 44089 | 0.09     | 86.96 $\pm$ 1.696                  | 0.43 $\pm$ 0.004                   | 56.98 $\pm$ 39.373       | -0.033 | 0.42 | 4     | 1.94    | 0.004 |
|         | 1     | 462  | 20383 | 0.19     | 88.24 $\pm$ 1.900                  | 0.49 $\pm$ 0.004                   | 64.92 $\pm$ 40.040       | -0.020 | 0.29 | 3     | 2.14    | 0.004 |
|         | 2     | 233  | 9312  | 0.34     | 79.93 $\pm$ 1.822                  | 0.58 $\pm$ 0.005                   | 71.32 $\pm$ 40.703       | -0.023 | 0.23 | 2     | 2.45    | 0.005 |
|         | 3     | 128  | 4186  | 0.52     | 65.41 $\pm$ 1.598                  | 0.68 $\pm$ 0.006                   | 76.46 $\pm$ 42.401       | -0.049 | 0.18 | 2     | 3.00    | 0.006 |
|         | 4     | 82   | 2044  | 0.62     | 49.85 $\pm$ 1.474                  | 0.76 $\pm$ 0.008                   | 76.05 $\pm$ 44.288       | -0.094 | 0.14 | 2     | 3.33    | 0.009 |
| No. 8   | 0     | 1014 | 36557 | 0.07     | 72.10 $\pm$ 1.633                  | 0.46 $\pm$ 0.005                   | 49.29 $\pm$ 35.917       | -0.044 | 0.41 | 4     | 1.97    | 0.004 |
|         | 1     | 462  | 17316 | 0.16     | 74.96 $\pm$ 1.831                  | 0.50 $\pm$ 0.005                   | 56.69 $\pm$ 37.010       | -0.042 | 0.33 | 3     | 2.18    | 0.005 |
|         | 2     | 233  | 8296  | 0.31     | 71.21 $\pm$ 1.772                  | 0.57 $\pm$ 0.006                   | 62.83 $\pm$ 37.979       | -0.036 | 0.26 | 3     | 2.49    | 0.005 |
|         | 3     | 128  | 3746  | 0.46     | 58.53 $\pm$ 1.570                  | 0.66 $\pm$ 0.007                   | 66.68 $\pm$ 39.094       | -0.037 | 0.21 | 2     | 2.84    | 0.007 |
|         | 4     | 82   | 1851  | 0.56     | 45.15 $\pm$ 1.475                  | 0.73 $\pm$ 0.009                   | 65.79 $\pm$ 40.188       | -0.062 | 0.18 | 2     | 3.41    | 0.010 |

| Subject | Layer | $N$  | $L$   | $\rho_l$ | $\langle k \rangle \pm \text{SEM}$ | $\langle c \rangle \pm \text{SEM}$ | $f^{(l)} \pm \text{SEM}$ | $r_c$  | $Q$  | $N_c$ | $\beta$ | $\mu$ |
|---------|-------|------|-------|----------|------------------------------------|------------------------------------|--------------------------|--------|------|-------|---------|-------|
| No. 9   | 0     | 1014 | 38249 | 0.07     | 75.44±1.613                        | 0.43±0.004                         | 55.86±40.591             | -0.045 | 0.40 | 4     | 1.83    | 0.004 |
|         | 1     | 462  | 18352 | 0.17     | 79.45±1.858                        | 0.48±0.005                         | 63.77±41.589             | -0.043 | 0.33 | 3     | 2.03    | 0.004 |
|         | 2     | 233  | 8702  | 0.32     | 74.70±1.850                        | 0.56±0.006                         | 70.08±42.715             | -0.045 | 0.26 | 3     | 2.19    | 0.005 |
|         | 3     | 128  | 3960  | 0.49     | 61.88±1.712                        | 0.66±0.007                         | 73.82±44.027             | -0.061 | 0.18 | 3     | 2.48    | 0.006 |
|         | 4     | 82   | 1922  | 0.58     | 46.88±1.625                        | 0.75±0.009                         | 72.11±43.995             | -0.105 | 0.13 | 2     | 2.84    | 0.009 |
| No. 10  | 0     | 1014 | 39578 | 0.08     | 78.06±1.493                        | 0.41±0.004                         | 62.41±43.797             | -0.024 | 0.35 | 3     | 1.90    | 0.004 |
|         | 1     | 462  | 18410 | 0.17     | 79.70±1.721                        | 0.48±0.005                         | 71.58±45.113             | -0.022 | 0.33 | 3     | 2.19    | 0.004 |
|         | 2     | 233  | 8589  | 0.32     | 73.73±1.694                        | 0.57±0.006                         | 78.76±46.197             | -0.022 | 0.27 | 3     | 2.48    | 0.005 |
|         | 3     | 128  | 3831  | 0.47     | 59.86±1.552                        | 0.66±0.007                         | 83.60±47.906             | -0.033 | 0.21 | 3     | 3.23    | 0.007 |
|         | 4     | 82   | 1865  | 0.56     | 45.49±1.430                        | 0.73±0.009                         | 82.79±50.090             | -0.080 | 0.18 | 2     | 3.51    | 0.010 |
| No. 11  | 0     | 1013 | 34436 | 0.07     | 67.99±1.343                        | 0.41±0.004                         | 56.10±41.192             | -0.025 | 0.38 | 4     | 1.90    | 0.004 |
|         | 1     | 462  | 16289 | 0.15     | 70.52±1.542                        | 0.46±0.004                         | 63.75±42.384             | -0.015 | 0.36 | 4     | 2.12    | 0.005 |
|         | 2     | 233  | 7718  | 0.29     | 66.25±1.546                        | 0.54±0.006                         | 70.16±43.299             | -0.017 | 0.28 | 4     | 2.36    | 0.006 |
|         | 3     | 128  | 3527  | 0.43     | 55.11±1.433                        | 0.63±0.007                         | 74.03±44.312             | -0.036 | 0.22 | 3     | 2.80    | 0.007 |
|         | 4     | 82   | 1733  | 0.52     | 42.27±1.412                        | 0.70±0.009                         | 73.19±45.508             | -0.067 | 0.18 | 2     | 3.03    | 0.010 |
| No. 12  | 0     | 1014 | 39631 | 0.08     | 78.17±1.541                        | 0.42±0.004                         | 55.80±40.787             | -0.029 | 0.40 | 4     | 1.84    | 0.004 |
|         | 1     | 462  | 18863 | 0.18     | 81.66±1.741                        | 0.47±0.004                         | 63.98±42.180             | -0.013 | 0.34 | 3     | 2.00    | 0.004 |
|         | 2     | 233  | 8793  | 0.33     | 75.48±1.749                        | 0.56±0.006                         | 70.85±43.667             | -0.023 | 0.27 | 3     | 2.46    | 0.005 |
|         | 3     | 128  | 3960  | 0.49     | 61.88±1.583                        | 0.66±0.007                         | 76.09±45.451             | -0.043 | 0.20 | 2     | 2.99    | 0.007 |
|         | 4     | 82   | 1944  | 0.59     | 47.41±1.516                        | 0.74±0.009                         | 75.56±46.732             | -0.090 | 0.15 | 2     | 2.99    | 0.009 |
| No. 13  | 0     | 1014 | 40358 | 0.08     | 79.60±1.692                        | 0.44±0.004                         | 58.05±40.581             | -0.044 | 0.40 | 4     | 1.97    | 0.004 |
|         | 1     | 462  | 19173 | 0.18     | 83.00±1.886                        | 0.49±0.005                         | 66.29±41.941             | -0.042 | 0.32 | 4     | 2.13    | 0.004 |
|         | 2     | 233  | 9043  | 0.33     | 77.62±1.846                        | 0.57±0.006                         | 73.68±43.391             | -0.042 | 0.23 | 3     | 2.56    | 0.005 |
|         | 3     | 128  | 4042  | 0.50     | 63.16±1.714                        | 0.68±0.007                         | 77.88±44.575             | -0.037 | 0.17 | 3     | 2.64    | 0.006 |
|         | 4     | 82   | 1999  | 0.60     | 48.76±1.592                        | 0.76±0.008                         | 76.36±45.471             | -0.076 | 0.12 | 2     | 3.58    | 0.009 |
| No. 14  | 0     | 1014 | 40821 | 0.08     | 80.51±1.583                        | 0.44±0.004                         | 54.98±38.809             | -0.040 | 0.43 | 4     | 1.98    | 0.004 |
|         | 1     | 462  | 19050 | 0.18     | 82.47±1.788                        | 0.50±0.005                         | 62.97±40.035             | -0.043 | 0.35 | 4     | 2.19    | 0.004 |
|         | 2     | 233  | 8767  | 0.32     | 75.25±1.749                        | 0.57±0.006                         | 69.72±41.571             | -0.042 | 0.25 | 3     | 2.59    | 0.005 |
|         | 3     | 128  | 3934  | 0.48     | 61.47±1.583                        | 0.66±0.007                         | 74.57±43.268             | -0.060 | 0.18 | 3     | 3.18    | 0.007 |
|         | 4     | 82   | 1938  | 0.58     | 47.27±1.521                        | 0.74±0.009                         | 74.58±45.075             | -0.100 | 0.12 | 3     | 3.24    | 0.009 |
| No. 15  | 0     | 1014 | 37896 | 0.07     | 74.75±1.563                        | 0.41±0.004                         | 61.60±43.403             | -0.039 | 0.43 | 4     | 1.87    | 0.004 |
|         | 1     | 462  | 18119 | 0.17     | 78.44±1.823                        | 0.47±0.005                         | 70.46±44.242             | -0.040 | 0.35 | 4     | 2.05    | 0.004 |
|         | 2     | 233  | 8732  | 0.32     | 74.95±1.802                        | 0.56±0.006                         | 77.63±45.368             | -0.042 | 0.26 | 3     | 2.47    | 0.005 |
|         | 3     | 128  | 4011  | 0.49     | 62.67±1.602                        | 0.66±0.006                         | 82.71±46.851             | -0.047 | 0.18 | 3     | 2.98    | 0.007 |
|         | 4     | 82   | 2035  | 0.61     | 49.63±1.501                        | 0.75±0.007                         | 83.78±48.511             | -0.074 | 0.13 | 2     | 3.60    | 0.009 |
| No. 16  | 0     | 1014 | 39589 | 0.08     | 78.08±1.617                        | 0.43±0.004                         | 60.62±43.139             | -0.046 | 0.41 | 4     | 1.95    | 0.004 |
|         | 1     | 462  | 18938 | 0.18     | 81.98±1.837                        | 0.49±0.005                         | 69.34±43.964             | -0.051 | 0.34 | 3     | 2.11    | 0.004 |
|         | 2     | 233  | 9018  | 0.33     | 77.41±1.792                        | 0.57±0.006                         | 76.09±44.730             | -0.055 | 0.26 | 3     | 2.43    | 0.005 |
|         | 3     | 128  | 4068  | 0.50     | 63.56±1.545                        | 0.66±0.006                         | 80.33±46.104             | -0.066 | 0.19 | 3     | 2.80    | 0.006 |
|         | 4     | 82   | 2008  | 0.60     | 48.98±1.383                        | 0.74±0.007                         | 79.31±47.395             | -0.086 | 0.16 | 2     | 3.24    | 0.009 |
| No. 17  | 0     | 1014 | 38009 | 0.07     | 74.97±1.591                        | 0.44±0.004                         | 53.98±38.401             | -0.026 | 0.43 | 4     | 1.95    | 0.004 |
|         | 1     | 462  | 17734 | 0.17     | 76.77±1.784                        | 0.49±0.005                         | 61.72±39.467             | -0.020 | 0.35 | 4     | 2.21    | 0.005 |
|         | 2     | 233  | 8280  | 0.31     | 71.07±1.758                        | 0.57±0.006                         | 67.56±40.191             | -0.037 | 0.28 | 3     | 2.62    | 0.005 |
|         | 3     | 128  | 3815  | 0.47     | 59.61±1.525                        | 0.65±0.007                         | 71.55±41.296             | -0.052 | 0.20 | 3     | 3.07    | 0.007 |
|         | 4     | 82   | 1910  | 0.58     | 46.59±1.443                        | 0.73±0.009                         | 72.47±43.781             | -0.100 | 0.16 | 2     | 3.64    | 0.009 |
| No. 18  | 0     | 1014 | 46070 | 0.09     | 90.87±1.707                        | 0.41±0.003                         | 62.24±43.523             | -0.033 | 0.37 | 3     | 1.90    | 0.003 |
|         | 1     | 462  | 21730 | 0.20     | 94.07±1.881                        | 0.49±0.004                         | 71.29±44.918             | -0.021 | 0.30 | 3     | 2.09    | 0.004 |
|         | 2     | 233  | 10019 | 0.37     | 86.00±1.759                        | 0.58±0.005                         | 79.50±46.687             | -0.030 | 0.24 | 3     | 2.56    | 0.004 |
|         | 3     | 128  | 4435  | 0.55     | 69.30±1.475                        | 0.68±0.005                         | 85.99±48.874             | -0.052 | 0.18 | 2     | 3.15    | 0.006 |
|         | 4     | 82   | 2155  | 0.65     | 52.56±1.385                        | 0.76±0.007                         | 86.68±51.335             | -0.103 | 0.14 | 2     | 2.59    | 0.007 |

| Subject | Layer | $N$  | $L$   | $\rho_l$ | $\langle k \rangle \pm \text{SEM}$ | $\langle c \rangle \pm \text{SEM}$ | $f^{(l)} \pm \text{SEM}$ | $r_c$  | $Q$  | $N_c$ | $\beta$ | $\mu$ |
|---------|-------|------|-------|----------|------------------------------------|------------------------------------|--------------------------|--------|------|-------|---------|-------|
| No. 19  | 0     | 1014 | 41676 | 0.08     | 82.20±1.639                        | 0.42±0.004                         | 57.88±40.396             | -0.035 | 0.39 | 3     | 1.87    | 0.004 |
|         | 1     | 462  | 19773 | 0.19     | 85.60±1.871                        | 0.48±0.004                         | 65.85±40.966             | -0.031 | 0.32 | 3     | 2.11    | 0.004 |
|         | 2     | 233  | 9225  | 0.34     | 79.18±1.837                        | 0.57±0.005                         | 72.99±42.182             | -0.042 | 0.24 | 3     | 2.29    | 0.005 |
|         | 3     | 128  | 4226  | 0.52     | 66.03±1.615                        | 0.68±0.006                         | 78.64±43.673             | -0.065 | 0.17 | 3     | 3.00    | 0.006 |
|         | 4     | 82   | 2066  | 0.62     | 50.39±1.556                        | 0.76±0.008                         | 78.10±45.409             | -0.112 | 0.12 | 2     | 3.42    | 0.009 |
| No. 20  | 0     | 1013 | 41727 | 0.08     | 82.38±1.620                        | 0.43±0.004                         | 52.87±37.651             | -0.039 | 0.40 | 4     | 1.95    | 0.004 |
|         | 1     | 462  | 19757 | 0.19     | 85.53±1.800                        | 0.48±0.005                         | 60.55±38.512             | -0.032 | 0.31 | 3     | 2.15    | 0.004 |
|         | 2     | 233  | 9241  | 0.34     | 79.32±1.723                        | 0.57±0.006                         | 67.10±39.748             | -0.034 | 0.26 | 3     | 2.55    | 0.005 |
|         | 3     | 128  | 4076  | 0.50     | 63.69±1.549                        | 0.67±0.006                         | 71.76±41.387             | -0.048 | 0.19 | 2     | 3.09    | 0.007 |
|         | 4     | 82   | 1972  | 0.59     | 48.10±1.455                        | 0.74±0.008                         | 70.69±43.019             | -0.087 | 0.15 | 2     | 3.58    | 0.009 |
| No. 21  | 0     | 1014 | 36659 | 0.07     | 72.31±1.553                        | 0.43±0.004                         | 55.79±40.647             | -0.041 | 0.43 | 4     | 1.89    | 0.004 |
|         | 1     | 462  | 17485 | 0.16     | 75.69±1.793                        | 0.48±0.005                         | 63.86±41.672             | -0.047 | 0.33 | 3     | 2.07    | 0.004 |
|         | 2     | 233  | 8392  | 0.31     | 72.03±1.760                        | 0.56±0.006                         | 70.54±42.918             | -0.058 | 0.26 | 3     | 2.35    | 0.005 |
|         | 3     | 128  | 3884  | 0.48     | 60.69±1.557                        | 0.65±0.006                         | 75.36±44.246             | -0.083 | 0.17 | 3     | 2.71    | 0.007 |
|         | 4     | 82   | 1995  | 0.60     | 48.66±1.407                        | 0.73±0.007                         | 76.37±46.385             | -0.103 | 0.13 | 2     | 2.72    | 0.008 |
| No. 22  | 0     | 1014 | 38855 | 0.08     | 76.64±1.514                        | 0.40±0.004                         | 65.81±46.676             | -0.034 | 0.41 | 4     | 1.78    | 0.004 |
|         | 1     | 462  | 18783 | 0.18     | 81.31±1.746                        | 0.46±0.004                         | 75.07±47.732             | -0.031 | 0.29 | 3     | 2.02    | 0.004 |
|         | 2     | 233  | 9072  | 0.34     | 77.87±1.721                        | 0.56±0.005                         | 82.94±48.893             | -0.048 | 0.23 | 3     | 2.31    | 0.005 |
|         | 3     | 128  | 4037  | 0.50     | 63.08±1.590                        | 0.67±0.006                         | 87.39±50.584             | -0.052 | 0.18 | 3     | 2.90    | 0.006 |
|         | 4     | 82   | 1966  | 0.59     | 47.95±1.553                        | 0.75±0.008                         | 86.89±52.990             | -0.091 | 0.12 | 3     | 2.79    | 0.008 |
| No. 23  | 0     | 1014 | 37235 | 0.07     | 73.44±1.444                        | 0.40±0.004                         | 60.43±43.800             | -0.039 | 0.42 | 4     | 1.87    | 0.004 |
|         | 1     | 462  | 17532 | 0.16     | 75.90±1.645                        | 0.46±0.004                         | 68.93±44.649             | -0.039 | 0.34 | 3     | 2.06    | 0.004 |
|         | 2     | 233  | 8467  | 0.31     | 72.68±1.607                        | 0.54±0.005                         | 76.18±45.622             | -0.049 | 0.27 | 3     | 2.39    | 0.005 |
|         | 3     | 128  | 3906  | 0.48     | 61.03±1.388                        | 0.64±0.005                         | 80.67±46.705             | -0.056 | 0.20 | 3     | 2.95    | 0.007 |
|         | 4     | 82   | 1929  | 0.58     | 47.05±1.286                        | 0.71±0.007                         | 80.18±48.393             | -0.091 | 0.17 | 2     | 3.66    | 0.009 |
| No. 24  | 0     | 1014 | 38407 | 0.07     | 75.75±1.534                        | 0.41±0.004                         | 59.11±42.707             | -0.040 | 0.39 | 3     | 1.90    | 0.004 |
|         | 1     | 462  | 18295 | 0.17     | 79.20±1.749                        | 0.47±0.004                         | 67.13±43.616             | -0.034 | 0.33 | 3     | 2.08    | 0.004 |
|         | 2     | 233  | 8666  | 0.32     | 74.39±1.687                        | 0.56±0.005                         | 73.38±44.184             | -0.042 | 0.26 | 3     | 2.48    | 0.005 |
|         | 3     | 128  | 3926  | 0.48     | 61.34±1.465                        | 0.65±0.006                         | 78.14±46.105             | -0.049 | 0.19 | 2     | 3.08    | 0.007 |
|         | 4     | 82   | 1919  | 0.58     | 46.80±1.385                        | 0.73±0.008                         | 76.37±46.714             | -0.096 | 0.16 | 2     | 3.57    | 0.009 |
| No. 25  | 0     | 1014 | 43631 | 0.08     | 86.06±1.659                        | 0.42±0.003                         | 57.71±40.073             | -0.033 | 0.42 | 4     | 1.90    | 0.004 |
|         | 1     | 462  | 20366 | 0.19     | 88.16±1.833                        | 0.49±0.004                         | 65.79±41.023             | -0.021 | 0.30 | 3     | 2.10    | 0.004 |
|         | 2     | 233  | 9329  | 0.35     | 80.08±1.812                        | 0.58±0.006                         | 72.29±41.947             | -0.027 | 0.25 | 3     | 2.56    | 0.005 |
|         | 3     | 128  | 4144  | 0.51     | 64.75±1.651                        | 0.69±0.007                         | 77.46±43.752             | -0.047 | 0.18 | 3     | 3.33    | 0.007 |
|         | 4     | 82   | 2033  | 0.61     | 49.59±1.543                        | 0.76±0.009                         | 76.84±45.405             | -0.100 | 0.14 | 2     | 3.76    | 0.009 |
| No. 26  | 0     | 1014 | 42351 | 0.08     | 83.53±1.634                        | 0.42±0.004                         | 57.06±40.212             | -0.021 | 0.40 | 4     | 1.90    | 0.004 |
|         | 1     | 462  | 20154 | 0.19     | 87.25±1.843                        | 0.48±0.004                         | 65.47±41.238             | -0.010 | 0.32 | 3     | 2.11    | 0.004 |
|         | 2     | 233  | 9465  | 0.35     | 81.24±1.745                        | 0.57±0.005                         | 72.29±42.137             | -0.011 | 0.23 | 3     | 2.50    | 0.005 |
|         | 3     | 128  | 4203  | 0.52     | 65.67±1.511                        | 0.67±0.005                         | 77.28±43.793             | -0.023 | 0.17 | 3     | 3.01    | 0.006 |
|         | 4     | 82   | 2090  | 0.63     | 50.98±1.412                        | 0.75±0.007                         | 77.41±45.244             | -0.095 | 0.14 | 2     | 2.82    | 0.008 |
| No. 27  | 0     | 1014 | 37875 | 0.07     | 74.70±1.469                        | 0.42±0.004                         | 60.28±44.013             | -0.025 | 0.43 | 4     | 1.91    | 0.004 |
|         | 1     | 462  | 17836 | 0.17     | 77.21±1.660                        | 0.47±0.004                         | 69.29±45.337             | -0.020 | 0.31 | 3     | 2.14    | 0.004 |
|         | 2     | 233  | 8418  | 0.31     | 72.26±1.619                        | 0.56±0.006                         | 75.70±45.756             | -0.035 | 0.28 | 3     | 2.53    | 0.005 |
|         | 3     | 128  | 3834  | 0.47     | 59.91±1.434                        | 0.65±0.007                         | 80.85±47.362             | -0.047 | 0.22 | 2     | 2.96    | 0.007 |
|         | 4     | 82   | 1889  | 0.57     | 46.07±1.366                        | 0.73±0.009                         | 79.79±49.279             | -0.086 | 0.18 | 2     | 3.25    | 0.009 |
| No. 28  | 0     | 1014 | 35737 | 0.07     | 70.49±1.478                        | 0.42±0.004                         | 56.48±41.154             | -0.040 | 0.43 | 4     | 1.86    | 0.004 |
|         | 1     | 462  | 16984 | 0.16     | 73.52±1.708                        | 0.47±0.005                         | 64.04±42.062             | -0.039 | 0.33 | 3     | 2.10    | 0.005 |
|         | 2     | 233  | 8227  | 0.30     | 70.62±1.707                        | 0.54±0.006                         | 70.74±43.134             | -0.042 | 0.26 | 3     | 2.36    | 0.005 |
|         | 3     | 128  | 3714  | 0.46     | 58.03±1.579                        | 0.65±0.007                         | 74.93±44.203             | -0.042 | 0.18 | 2     | 2.97    | 0.007 |
|         | 4     | 82   | 1844  | 0.56     | 44.98±1.547                        | 0.73±0.009                         | 74.89±45.887             | -0.077 | 0.14 | 3     | 3.37    | 0.010 |

| Subject | Layer | $N$  | $L$   | $\rho_l$ | $\langle k \rangle \pm \text{SEM}$ | $\langle c \rangle \pm \text{SEM}$ | $f^{(l)} \pm \text{SEM}$ | $r_c$  | $Q$  | $N_c$ | $\beta$ | $\mu$ |
|---------|-------|------|-------|----------|------------------------------------|------------------------------------|--------------------------|--------|------|-------|---------|-------|
| No. 29  | 0     | 1014 | 39125 | 0.08     | 77.17±1.492                        | 0.42±0.004                         | 53.54±38.013             | -0.033 | 0.45 | 4     | 1.86    | 0.004 |
|         | 1     | 462  | 18508 | 0.17     | 80.12±1.681                        | 0.48±0.004                         | 61.19±39.093             | -0.030 | 0.34 | 3     | 2.19    | 0.004 |
|         | 2     | 233  | 8648  | 0.32     | 74.23±1.640                        | 0.57±0.006                         | 67.30±40.065             | -0.048 | 0.26 | 3     | 2.66    | 0.005 |
|         | 3     | 128  | 3898  | 0.48     | 60.91±1.427                        | 0.65±0.007                         | 71.73±41.755             | -0.054 | 0.21 | 2     | 3.02    | 0.007 |
|         | 4     | 82   | 1934  | 0.58     | 47.17±1.354                        | 0.72±0.008                         | 71.67±43.399             | -0.099 | 0.16 | 2     | 3.40    | 0.009 |
| No. 30  | 0     | 1014 | 41041 | 0.08     | 80.95±1.596                        | 0.43±0.004                         | 55.82±40.595             | -0.033 | 0.40 | 3     | 1.94    | 0.004 |
|         | 1     | 462  | 19264 | 0.18     | 83.39±1.793                        | 0.48±0.004                         | 64.27±41.937             | -0.030 | 0.34 | 3     | 2.11    | 0.004 |
|         | 2     | 233  | 9012  | 0.33     | 77.36±1.736                        | 0.57±0.006                         | 71.01±43.245             | -0.037 | 0.27 | 3     | 2.45    | 0.005 |
|         | 3     | 128  | 4097  | 0.50     | 64.02±1.548                        | 0.66±0.006                         | 76.38±44.786             | -0.059 | 0.20 | 2     | 3.09    | 0.007 |
|         | 4     | 82   | 2034  | 0.61     | 49.61±1.457                        | 0.75±0.008                         | 76.21±46.418             | -0.096 | 0.15 | 2     | 2.78    | 0.008 |
| No. 31  | 0     | 1014 | 39813 | 0.08     | 78.53±1.582                        | 0.42±0.004                         | 61.38±43.914             | -0.036 | 0.40 | 4     | 1.84    | 0.004 |
|         | 1     | 462  | 18826 | 0.18     | 81.50±1.805                        | 0.47±0.004                         | 70.46±45.286             | -0.022 | 0.32 | 3     | 2.06    | 0.004 |
|         | 2     | 233  | 8861  | 0.33     | 76.06±1.811                        | 0.57±0.006                         | 77.90±46.474             | -0.030 | 0.24 | 2     | 2.50    | 0.005 |
|         | 3     | 128  | 3949  | 0.49     | 61.70±1.655                        | 0.67±0.007                         | 82.78±47.844             | -0.051 | 0.19 | 2     | 3.16    | 0.007 |
|         | 4     | 82   | 1914  | 0.58     | 46.68±1.539                        | 0.75±0.009                         | 81.71±50.231             | -0.081 | 0.15 | 2     | 3.79    | 0.010 |
| No. 32  | 0     | 1013 | 39161 | 0.08     | 77.32±1.574                        | 0.43±0.004                         | 61.96±43.540             | -0.033 | 0.43 | 4     | 1.91    | 0.004 |
|         | 1     | 462  | 18393 | 0.17     | 79.62±1.795                        | 0.49±0.005                         | 70.68±44.698             | -0.027 | 0.30 | 3     | 2.20    | 0.004 |
|         | 2     | 233  | 8649  | 0.32     | 74.24±1.768                        | 0.57±0.006                         | 78.46±46.346             | -0.030 | 0.27 | 3     | 2.72    | 0.005 |
|         | 3     | 128  | 3827  | 0.47     | 59.80±1.607                        | 0.66±0.007                         | 82.92±48.538             | -0.058 | 0.20 | 2     | 2.99    | 0.007 |
|         | 4     | 82   | 1931  | 0.58     | 47.10±1.472                        | 0.74±0.008                         | 84.74±52.183             | -0.096 | 0.15 | 2     | 3.22    | 0.009 |
| No. 33  | 0     | 1014 | 40400 | 0.08     | 79.68±1.602                        | 0.41±0.004                         | 60.92±43.352             | -0.034 | 0.41 | 4     | 1.90    | 0.004 |
|         | 1     | 462  | 19127 | 0.18     | 82.80±1.801                        | 0.47±0.004                         | 69.55±44.780             | -0.026 | 0.29 | 3     | 2.04    | 0.004 |
|         | 2     | 233  | 9119  | 0.34     | 78.27±1.754                        | 0.56±0.005                         | 77.32±46.285             | -0.028 | 0.26 | 3     | 2.29    | 0.005 |
|         | 3     | 128  | 4058  | 0.50     | 63.41±1.579                        | 0.66±0.006                         | 82.08±47.901             | -0.041 | 0.18 | 3     | 2.74    | 0.006 |
|         | 4     | 82   | 1988  | 0.60     | 48.49±1.507                        | 0.75±0.008                         | 82.25±49.821             | -0.072 | 0.15 | 2     | 2.73    | 0.008 |
| No. 34  | 0     | 1014 | 44274 | 0.09     | 87.33±1.689                        | 0.42±0.003                         | 57.56±39.889             | -0.036 | 0.40 | 3     | 1.87    | 0.003 |
|         | 1     | 462  | 20590 | 0.19     | 89.13±1.871                        | 0.49±0.004                         | 65.60±40.953             | -0.025 | 0.33 | 3     | 2.11    | 0.004 |
|         | 2     | 233  | 9377  | 0.35     | 80.49±1.811                        | 0.58±0.005                         | 72.08±41.786             | -0.032 | 0.26 | 3     | 2.49    | 0.005 |
|         | 3     | 128  | 4226  | 0.52     | 66.03±1.547                        | 0.68±0.006                         | 77.22±43.408             | -0.037 | 0.18 | 3     | 3.22    | 0.006 |
|         | 4     | 82   | 2073  | 0.62     | 50.56±1.417                        | 0.76±0.008                         | 76.60±45.167             | -0.084 | 0.14 | 2     | 3.78    | 0.009 |
| No. 35  | 0     | 1014 | 46025 | 0.09     | 90.78±1.718                        | 0.42±0.004                         | 59.63±41.389             | -0.039 | 0.42 | 4     | 1.92    | 0.003 |
|         | 1     | 462  | 21758 | 0.20     | 94.19±1.866                        | 0.49±0.005                         | 67.87±42.403             | -0.028 | 0.32 | 4     | 2.19    | 0.004 |
|         | 2     | 233  | 10004 | 0.37     | 85.87±1.779                        | 0.58±0.005                         | 75.13±43.948             | -0.026 | 0.23 | 3     | 2.32    | 0.004 |
|         | 3     | 128  | 4407  | 0.54     | 68.86±1.552                        | 0.68±0.005                         | 80.19±45.905             | -0.030 | 0.15 | 4     | 2.85    | 0.006 |
|         | 4     | 82   | 2082  | 0.63     | 50.78±1.475                        | 0.76±0.007                         | 78.59±47.181             | -0.079 | 0.14 | 2     | 3.11    | 0.008 |
| No. 36  | 0     | 1014 | 37237 | 0.07     | 73.45±1.452                        | 0.40±0.004                         | 66.00±47.148             | -0.034 | 0.42 | 4     | 1.84    | 0.004 |
|         | 1     | 462  | 18008 | 0.17     | 77.96±1.669                        | 0.46±0.004                         | 74.83±47.827             | -0.032 | 0.33 | 3     | 2.06    | 0.004 |
|         | 2     | 233  | 8643  | 0.32     | 74.19±1.670                        | 0.55±0.006                         | 81.89±48.483             | -0.037 | 0.24 | 3     | 2.34    | 0.005 |
|         | 3     | 128  | 3839  | 0.47     | 59.98±1.594                        | 0.66±0.007                         | 85.54±49.436             | -0.059 | 0.18 | 3     | 3.25    | 0.007 |
|         | 4     | 82   | 1882  | 0.57     | 45.90±1.575                        | 0.74±0.010                         | 84.52±50.913             | -0.105 | 0.14 | 2     | 3.89    | 0.010 |
| No. 37  | 0     | 1014 | 45512 | 0.09     | 89.77±1.754                        | 0.43±0.003                         | 62.17±43.255             | -0.034 | 0.37 | 3     | 1.90    | 0.003 |
|         | 1     | 462  | 21300 | 0.20     | 92.21±1.907                        | 0.49±0.004                         | 71.61±44.528             | -0.021 | 0.33 | 3     | 2.14    | 0.004 |
|         | 2     | 233  | 9778  | 0.36     | 83.93±1.777                        | 0.59±0.005                         | 79.40±46.037             | -0.030 | 0.26 | 3     | 2.49    | 0.005 |
|         | 3     | 128  | 4329  | 0.53     | 67.64±1.522                        | 0.68±0.005                         | 84.30±47.821             | -0.045 | 0.19 | 2     | 2.97    | 0.006 |
|         | 4     | 82   | 2081  | 0.63     | 50.76±1.403                        | 0.76±0.007                         | 82.28±48.698             | -0.083 | 0.15 | 2     | 4.09    | 0.009 |
| No. 38  | 0     | 1014 | 40209 | 0.08     | 79.31±1.606                        | 0.41±0.004                         | 62.03±44.458             | -0.034 | 0.39 | 3     | 1.86    | 0.004 |
|         | 1     | 462  | 19094 | 0.18     | 82.66±1.810                        | 0.47±0.004                         | 71.12±45.812             | -0.029 | 0.33 | 3     | 2.05    | 0.004 |
|         | 2     | 233  | 9038  | 0.33     | 77.58±1.724                        | 0.55±0.005                         | 79.05±47.440             | -0.029 | 0.22 | 2     | 2.39    | 0.005 |
|         | 3     | 128  | 4024  | 0.50     | 62.88±1.606                        | 0.66±0.006                         | 84.41±49.498             | -0.039 | 0.16 | 3     | 2.81    | 0.006 |
|         | 4     | 82   | 1970  | 0.59     | 48.05±1.523                        | 0.75±0.008                         | 84.05±51.966             | -0.052 | 0.14 | 2     | 2.87    | 0.008 |

| Subject | Layer | $N$  | $L$   | $\rho_l$ | $\langle k \rangle \pm \text{SEM}$ | $\langle c \rangle \pm \text{SEM}$ | $f^{(l)} \pm \text{SEM}$ | $r_c$  | $Q$  | $N_c$ | $\beta$ | $\mu$ |
|---------|-------|------|-------|----------|------------------------------------|------------------------------------|--------------------------|--------|------|-------|---------|-------|
| No. 39  | 0     | 1014 | 34947 | 0.07     | 68.93±1.521                        | 0.43±0.004                         | 56.48±40.483             | -0.047 | 0.44 | 4     | 1.89    | 0.004 |
|         | 1     | 462  | 16844 | 0.16     | 72.92±1.755                        | 0.48±0.005                         | 64.16±41.220             | -0.041 | 0.36 | 4     | 2.09    | 0.005 |
|         | 2     | 233  | 8121  | 0.30     | 69.71±1.767                        | 0.56±0.006                         | 70.91±42.134             | -0.051 | 0.25 | 3     | 2.33    | 0.005 |
|         | 3     | 128  | 3703  | 0.46     | 57.86±1.619                        | 0.65±0.008                         | 74.79±43.341             | -0.062 | 0.18 | 3     | 2.87    | 0.007 |
|         | 4     | 82   | 1877  | 0.57     | 45.78±1.542                        | 0.73±0.009                         | 73.59±44.114             | -0.090 | 0.13 | 3     | 3.23    | 0.009 |
| No. 40  | 0     | 1014 | 38384 | 0.07     | 75.71±1.547                        | 0.41±0.004                         | 55.33±40.100             | -0.037 | 0.41 | 4     | 1.85    | 0.004 |
|         | 1     | 462  | 18201 | 0.17     | 78.79±1.786                        | 0.47±0.005                         | 63.53±41.379             | -0.032 | 0.29 | 3     | 2.02    | 0.004 |
|         | 2     | 233  | 8652  | 0.32     | 74.27±1.753                        | 0.56±0.005                         | 70.13±42.407             | -0.032 | 0.26 | 3     | 2.42    | 0.005 |
|         | 3     | 128  | 3892  | 0.48     | 60.81±1.611                        | 0.66±0.007                         | 73.98±43.283             | -0.040 | 0.19 | 2     | 2.95    | 0.007 |
|         | 4     | 82   | 1916  | 0.58     | 46.73±1.541                        | 0.74±0.009                         | 72.01±43.377             | -0.079 | 0.15 | 2     | 3.00    | 0.009 |
| No. 41  | 0     | 1014 | 35161 | 0.07     | 69.35±1.455                        | 0.42±0.004                         | 56.84±41.915             | -0.037 | 0.42 | 4     | 1.90    | 0.004 |
|         | 1     | 462  | 16812 | 0.16     | 72.78±1.695                        | 0.46±0.005                         | 64.84±43.044             | -0.036 | 0.30 | 4     | 1.96    | 0.004 |
|         | 2     | 233  | 8086  | 0.30     | 69.41±1.727                        | 0.55±0.006                         | 71.68±44.498             | -0.050 | 0.26 | 3     | 2.32    | 0.005 |
|         | 3     | 128  | 3751  | 0.46     | 58.61±1.603                        | 0.65±0.007                         | 75.60±45.089             | -0.058 | 0.19 | 3     | 2.77    | 0.007 |
|         | 4     | 82   | 1886  | 0.57     | 46.00±1.542                        | 0.74±0.009                         | 75.09±46.191             | -0.100 | 0.13 | 3     | 2.98    | 0.009 |
| No. 42  | 0     | 1014 | 40731 | 0.08     | 80.34±1.544                        | 0.42±0.004                         | 58.24±42.013             | -0.037 | 0.42 | 4     | 1.90    | 0.004 |
|         | 1     | 462  | 19399 | 0.18     | 83.98±1.731                        | 0.47±0.005                         | 66.42±43.086             | -0.033 | 0.34 | 3     | 2.13    | 0.004 |
|         | 2     | 233  | 9190  | 0.34     | 78.88±1.677                        | 0.56±0.006                         | 73.32±43.902             | -0.035 | 0.27 | 3     | 2.53    | 0.005 |
|         | 3     | 128  | 4147  | 0.51     | 64.80±1.537                        | 0.67±0.006                         | 79.48±46.699             | -0.052 | 0.19 | 3     | 3.08    | 0.006 |
|         | 4     | 82   | 2057  | 0.62     | 50.17±1.447                        | 0.76±0.008                         | 80.02±49.576             | -0.070 | 0.15 | 2     | 4.14    | 0.009 |
| No. 43  | 0     | 1014 | 37845 | 0.07     | 74.64±1.535                        | 0.43±0.004                         | 56.27±40.721             | -0.034 | 0.44 | 4     | 1.95    | 0.004 |
|         | 1     | 462  | 17927 | 0.17     | 77.61±1.744                        | 0.49±0.005                         | 64.87±42.105             | -0.034 | 0.32 | 3     | 2.19    | 0.004 |
|         | 2     | 233  | 8449  | 0.31     | 72.52±1.728                        | 0.57±0.006                         | 71.61±43.110             | -0.047 | 0.27 | 4     | 2.64    | 0.005 |
|         | 3     | 128  | 3869  | 0.48     | 60.45±1.536                        | 0.66±0.007                         | 77.54±44.988             | -0.057 | 0.16 | 3     | 2.81    | 0.007 |
|         | 4     | 82   | 1898  | 0.57     | 46.29±1.416                        | 0.73±0.008                         | 76.80±46.405             | -0.088 | 0.12 | 2     | 3.39    | 0.009 |

TABLE S3. The dispersion between empirical subjects for degrees, number of triangles of nodes, and sum of the degrees of neighbors in layer 0 for UL dataset. For each brain region, we calculate the mean and standard deviation  $\sigma$  of the three quantities over all subjects. Then we obtain the Pearson correlation coefficient  $\rho$  and the  $\chi^2$  test ( $\chi^2 = \sum_i^N (\frac{value_{real} - value_{group}}{\sigma_{group}})^2$ ) between specific subject and the average in the cohort. The quantity  $\zeta$  corresponds to the fraction of nodes for which the value measured on the specific network lies outside the  $2\sigma$  confidence interval around the average.

| Subject | degree |            |         | number of triangles |            |         | sum degree of neighbors |            |         |
|---------|--------|------------|---------|---------------------|------------|---------|-------------------------|------------|---------|
|         | $\rho$ | $\chi^2/N$ | $\zeta$ | $\rho$              | $\chi^2/N$ | $\zeta$ | $\rho$                  | $\chi^2/N$ | $\zeta$ |
| 0       | 0.812  | 1.034      | 0.056   | 0.817               | 1.117      | 0.067   | 0.789                   | 0.865      | 0.037   |
| 1       | 0.826  | 1.018      | 0.050   | 0.847               | 1.075      | 0.062   | 0.787                   | 1.170      | 0.066   |
| 2       | 0.795  | 0.959      | 0.037   | 0.825               | 0.916      | 0.044   | 0.773                   | 0.835      | 0.026   |
| 3       | 0.823  | 0.862      | 0.028   | 0.853               | 0.692      | 0.015   | 0.820                   | 0.716      | 0.007   |
| 4       | 0.852  | 1.031      | 0.060   | 0.891               | 1.084      | 0.064   | 0.841                   | 1.352      | 0.088   |
| 5       | 0.859  | 0.850      | 0.032   | 0.890               | 0.719      | 0.025   | 0.831                   | 0.823      | 0.037   |
| 6       | 0.818  | 0.916      | 0.032   | 0.835               | 0.841      | 0.034   | 0.763                   | 0.864      | 0.024   |
| 7       | 0.853  | 0.909      | 0.033   | 0.874               | 0.849      | 0.033   | 0.815                   | 0.870      | 0.035   |
| 8       | 0.770  | 1.121      | 0.061   | 0.799               | 1.080      | 0.055   | 0.756                   | 1.033      | 0.051   |
| 9       | 0.845  | 0.737      | 0.024   | 0.856               | 0.676      | 0.019   | 0.822                   | 0.659      | 0.011   |
| 10      | 0.813  | 0.983      | 0.055   | 0.817               | 1.106      | 0.066   | 0.789                   | 0.926      | 0.043   |
| 11      | 0.784  | 1.154      | 0.056   | 0.810               | 1.181      | 0.057   | 0.735                   | 1.175      | 0.060   |
| 12      | 0.780  | 1.044      | 0.049   | 0.804               | 1.079      | 0.057   | 0.756                   | 0.977      | 0.045   |
| 13      | 0.812  | 1.118      | 0.055   | 0.840               | 1.228      | 0.067   | 0.783                   | 1.240      | 0.070   |
| 14      | 0.830  | 1.057      | 0.052   | 0.846               | 1.194      | 0.076   | 0.815                   | 1.080      | 0.062   |
| 15      | 0.818  | 1.271      | 0.077   | 0.844               | 1.726      | 0.121   | 0.787                   | 1.499      | 0.106   |
| 16      | 0.849  | 0.895      | 0.036   | 0.878               | 0.891      | 0.040   | 0.818                   | 0.994      | 0.049   |
| 17      | 0.831  | 0.907      | 0.036   | 0.844               | 0.850      | 0.038   | 0.795                   | 0.844      | 0.032   |
| 18      | 0.834  | 0.906      | 0.026   | 0.850               | 0.762      | 0.026   | 0.792                   | 0.806      | 0.021   |
| 19      | 0.805  | 1.153      | 0.067   | 0.837               | 1.119      | 0.072   | 0.779                   | 1.202      | 0.071   |
| 20      | 0.759  | 1.181      | 0.058   | 0.784               | 1.043      | 0.047   | 0.724                   | 1.002      | 0.036   |
| 21      | 0.757  | 1.229      | 0.051   | 0.761               | 1.060      | 0.043   | 0.695                   | 1.025      | 0.026   |
| 22      | 0.834  | 0.798      | 0.028   | 0.849               | 0.698      | 0.023   | 0.814                   | 0.699      | 0.019   |
| 23      | 0.793  | 1.116      | 0.058   | 0.784               | 1.362      | 0.081   | 0.744                   | 1.125      | 0.062   |
| 24      | 0.825  | 0.910      | 0.041   | 0.841               | 0.823      | 0.038   | 0.797                   | 0.850      | 0.030   |
| 25      | 0.838  | 0.982      | 0.045   | 0.847               | 1.152      | 0.068   | 0.801                   | 1.293      | 0.077   |
| 26      | 0.796  | 1.163      | 0.058   | 0.791               | 1.137      | 0.045   | 0.717                   | 1.118      | 0.043   |
| 27      | 0.808  | 0.848      | 0.026   | 0.830               | 0.718      | 0.016   | 0.777                   | 0.768      | 0.014   |
| 28      | 0.822  | 1.079      | 0.055   | 0.831               | 1.268      | 0.073   | 0.775                   | 1.391      | 0.084   |
| 29      | 0.814  | 0.912      | 0.028   | 0.839               | 0.837      | 0.036   | 0.785                   | 0.790      | 0.022   |
| 30      | 0.848  | 0.875      | 0.035   | 0.879               | 0.891      | 0.051   | 0.816                   | 0.912      | 0.043   |
| 31      | 0.815  | 1.231      | 0.074   | 0.842               | 1.474      | 0.090   | 0.778                   | 1.580      | 0.114   |
| 32      | 0.807  | 0.958      | 0.033   | 0.811               | 0.874      | 0.027   | 0.751                   | 0.942      | 0.032   |
| 33      | 0.821  | 1.075      | 0.055   | 0.847               | 1.169      | 0.062   | 0.813                   | 1.037      | 0.049   |
| 34      | 0.815  | 1.088      | 0.057   | 0.831               | 1.055      | 0.054   | 0.789                   | 1.104      | 0.058   |
| 35      | 0.851  | 0.809      | 0.025   | 0.863               | 0.706      | 0.018   | 0.816                   | 0.785      | 0.013   |
| 36      | 0.832  | 0.958      | 0.043   | 0.837               | 0.988      | 0.058   | 0.814                   | 0.924      | 0.044   |
| 37      | 0.834  | 0.908      | 0.035   | 0.852               | 0.812      | 0.037   | 0.808                   | 0.899      | 0.038   |
| 38      | 0.804  | 1.021      | 0.048   | 0.838               | 0.983      | 0.049   | 0.792                   | 0.968      | 0.033   |
| 39      | 0.848  | 0.937      | 0.029   | 0.881               | 0.773      | 0.022   | 0.806                   | 0.860      | 0.026   |

TABLE S4. The dispersion between empirical subjects for degrees, number of triangles of nodes, and sum of the degrees of neighbors in layer 0 for HCP dataset. For each brain region, we calculate the mean and standard deviation  $\sigma$  of the three quantities over all subjects. Then we obtain the Pearson correlation coefficient  $\rho$  and the  $\chi^2$  test ( $\chi^2 = \sum_i^N (\frac{value_{real} - value_{group}}{\sigma_{group}})^2$ ) between specific subject and the average in the cohort. The quantity  $\zeta$  corresponds to the fraction of nodes for which the value measured on the specific network lies outside the  $2\sigma$  confidence interval around the average.

| Subject | degree |            |         | number of triangles |            |         | sum degree of neighbors |            |         |
|---------|--------|------------|---------|---------------------|------------|---------|-------------------------|------------|---------|
|         | $\rho$ | $\chi^2/N$ | $\zeta$ | $\rho$              | $\chi^2/N$ | $\zeta$ | $\rho$                  | $\chi^2/N$ | $\zeta$ |
| 0       | 0.875  | 0.937      | 0.035   | 0.913               | 0.805      | 0.017   | 0.873                   | 0.858      | 0.022   |
| 1       | 0.909  | 0.859      | 0.027   | 0.938               | 0.779      | 0.025   | 0.899                   | 0.796      | 0.029   |
| 2       | 0.904  | 0.802      | 0.023   | 0.942               | 0.713      | 0.019   | 0.897                   | 0.712      | 0.016   |
| 3       | 0.894  | 1.037      | 0.044   | 0.929               | 1.017      | 0.050   | 0.888                   | 0.988      | 0.044   |
| 4       | 0.888  | 1.180      | 0.068   | 0.932               | 1.240      | 0.079   | 0.875                   | 1.353      | 0.084   |
| 5       | 0.869  | 1.093      | 0.059   | 0.922               | 1.047      | 0.053   | 0.853                   | 0.981      | 0.051   |
| 6       | 0.897  | 0.864      | 0.028   | 0.936               | 0.803      | 0.022   | 0.881                   | 0.763      | 0.026   |
| 7       | 0.899  | 1.131      | 0.065   | 0.942               | 1.421      | 0.105   | 0.892                   | 1.388      | 0.088   |
| 8       | 0.888  | 1.064      | 0.034   | 0.918               | 0.952      | 0.030   | 0.870                   | 0.934      | 0.026   |
| 9       | 0.866  | 1.208      | 0.060   | 0.905               | 1.097      | 0.047   | 0.840                   | 1.075      | 0.049   |
| 10      | 0.889  | 0.880      | 0.026   | 0.935               | 0.771      | 0.022   | 0.882                   | 0.737      | 0.017   |
| 11      | 0.886  | 0.933      | 0.027   | 0.927               | 0.841      | 0.010   | 0.881                   | 1.159      | 0.034   |
| 12      | 0.888  | 0.969      | 0.039   | 0.932               | 0.886      | 0.037   | 0.883                   | 0.829      | 0.024   |
| 13      | 0.895  | 1.005      | 0.043   | 0.928               | 1.033      | 0.049   | 0.882                   | 0.967      | 0.046   |
| 14      | 0.873  | 1.052      | 0.058   | 0.910               | 1.086      | 0.062   | 0.855                   | 0.948      | 0.045   |
| 15      | 0.888  | 0.975      | 0.044   | 0.932               | 0.846      | 0.025   | 0.870                   | 0.842      | 0.022   |
| 16      | 0.899  | 0.882      | 0.029   | 0.934               | 0.820      | 0.029   | 0.876                   | 0.799      | 0.019   |
| 17      | 0.889  | 0.976      | 0.039   | 0.913               | 0.965      | 0.037   | 0.877                   | 0.916      | 0.030   |
| 18      | 0.860  | 1.616      | 0.116   | 0.906               | 2.177      | 0.170   | 0.858                   | 2.041      | 0.175   |
| 19      | 0.884  | 1.060      | 0.056   | 0.929               | 1.083      | 0.064   | 0.872                   | 1.069      | 0.061   |
| 20      | 0.881  | 1.032      | 0.052   | 0.924               | 1.094      | 0.054   | 0.870                   | 0.995      | 0.050   |
| 21      | 0.884  | 1.024      | 0.039   | 0.922               | 0.888      | 0.025   | 0.865                   | 0.923      | 0.025   |
| 22      | 0.893  | 0.851      | 0.023   | 0.934               | 0.747      | 0.020   | 0.880                   | 0.724      | 0.011   |
| 23      | 0.891  | 0.829      | 0.018   | 0.931               | 0.719      | 0.009   | 0.874                   | 0.797      | 0.019   |
| 24      | 0.897  | 0.837      | 0.024   | 0.932               | 0.744      | 0.020   | 0.884                   | 0.732      | 0.020   |
| 25      | 0.896  | 1.082      | 0.062   | 0.940               | 1.242      | 0.085   | 0.886                   | 1.224      | 0.076   |
| 26      | 0.884  | 1.077      | 0.052   | 0.926               | 1.151      | 0.069   | 0.885                   | 1.124      | 0.061   |
| 27      | 0.894  | 0.832      | 0.023   | 0.928               | 0.731      | 0.014   | 0.884                   | 0.773      | 0.012   |
| 28      | 0.892  | 0.913      | 0.019   | 0.929               | 0.804      | 0.009   | 0.878                   | 0.914      | 0.020   |
| 29      | 0.883  | 0.885      | 0.034   | 0.928               | 0.773      | 0.019   | 0.875                   | 0.725      | 0.017   |
| 30      | 0.891  | 0.956      | 0.038   | 0.928               | 0.974      | 0.055   | 0.872                   | 0.927      | 0.031   |
| 31      | 0.895  | 0.852      | 0.026   | 0.934               | 0.772      | 0.023   | 0.886                   | 0.734      | 0.019   |
| 32      | 0.894  | 0.903      | 0.028   | 0.934               | 0.815      | 0.029   | 0.884                   | 0.788      | 0.021   |
| 33      | 0.894  | 0.943      | 0.036   | 0.936               | 0.860      | 0.037   | 0.880                   | 0.858      | 0.027   |
| 34      | 0.901  | 1.144      | 0.061   | 0.944               | 1.353      | 0.088   | 0.893                   | 1.382      | 0.084   |
| 35      | 0.884  | 1.494      | 0.095   | 0.925               | 2.074      | 0.167   | 0.870                   | 2.204      | 0.185   |
| 36      | 0.872  | 0.942      | 0.029   | 0.915               | 0.851      | 0.016   | 0.852                   | 0.889      | 0.022   |
| 37      | 0.885  | 1.383      | 0.095   | 0.926               | 2.008      | 0.141   | 0.878                   | 1.977      | 0.159   |
| 38      | 0.893  | 0.951      | 0.042   | 0.932               | 0.948      | 0.048   | 0.880                   | 0.887      | 0.032   |
| 39      | 0.915  | 0.885      | 0.020   | 0.946               | 0.782      | 0.013   | 0.899                   | 0.874      | 0.013   |
| 40      | 0.890  | 0.866      | 0.029   | 0.932               | 0.744      | 0.019   | 0.877                   | 0.749      | 0.016   |
| 41      | 0.894  | 0.938      | 0.025   | 0.929               | 0.839      | 0.010   | 0.879                   | 0.981      | 0.015   |
| 42      | 0.880  | 0.963      | 0.042   | 0.918               | 0.940      | 0.042   | 0.860                   | 0.875      | 0.036   |
| 43      | 0.888  | 0.897      | 0.028   | 0.924               | 0.764      | 0.019   | 0.882                   | 0.789      | 0.017   |



TABLE S5. The goodness of fit between the predictions of our model and real values for degrees, number of triangles of nodes, and sum of the degrees of neighbors in layer 0 for UL dataset. The Pearson correlation coefficient  $\rho$ , the  $\chi^2$  test ( $\chi^2 = \sum_i^N (\frac{x_{original} - x_{inferred}}{\sigma})^2$ ), the quantity  $\zeta$  corresponds to the fraction of nodes for which the value measured on the original network lies outside the  $2\sigma$  confidence interval.

| Subject | degree |            |         | number of triangles |            |         | sum degree of neighbors |            |         |
|---------|--------|------------|---------|---------------------|------------|---------|-------------------------|------------|---------|
|         | $\rho$ | $\chi^2/N$ | $\zeta$ | $\rho$              | $\chi^2/N$ | $\zeta$ | $\rho$                  | $\chi^2/N$ | $\zeta$ |
| 0       | 1.000  | 0.011      | 0.000   | 0.977               | 0.944      | 0.049   | 0.963                   | 1.419      | 0.082   |
| 1       | 1.000  | 0.010      | 0.000   | 0.979               | 0.932      | 0.053   | 0.963                   | 1.728      | 0.127   |
| 2       | 1.000  | 0.010      | 0.000   | 0.981               | 0.824      | 0.034   | 0.964                   | 1.465      | 0.096   |
| 3       | 1.000  | 0.010      | 0.000   | 0.985               | 0.769      | 0.033   | 0.955                   | 1.721      | 0.116   |
| 4       | 1.000  | 0.010      | 0.000   | 0.980               | 0.888      | 0.034   | 0.968                   | 1.736      | 0.123   |
| 5       | 1.000  | 0.011      | 0.000   | 0.983               | 0.832      | 0.038   | 0.959                   | 1.545      | 0.088   |
| 6       | 1.000  | 0.011      | 0.000   | 0.983               | 0.751      | 0.029   | 0.956                   | 1.647      | 0.110   |
| 7       | 1.000  | 0.010      | 0.000   | 0.983               | 0.843      | 0.041   | 0.956                   | 1.662      | 0.116   |
| 8       | 1.000  | 0.010      | 0.000   | 0.980               | 0.877      | 0.040   | 0.964                   | 1.547      | 0.089   |
| 9       | 1.000  | 0.011      | 0.000   | 0.976               | 0.713      | 0.022   | 0.960                   | 1.545      | 0.076   |
| 10      | 1.000  | 0.010      | 0.000   | 0.973               | 1.092      | 0.064   | 0.966                   | 1.328      | 0.073   |
| 11      | 1.000  | 0.010      | 0.000   | 0.979               | 1.094      | 0.067   | 0.965                   | 1.352      | 0.087   |
| 12      | 1.000  | 0.010      | 0.000   | 0.974               | 1.016      | 0.052   | 0.968                   | 1.496      | 0.104   |
| 13      | 1.000  | 0.010      | 0.000   | 0.989               | 0.833      | 0.045   | 0.969                   | 1.562      | 0.105   |
| 14      | 1.000  | 0.010      | 0.000   | 0.982               | 0.787      | 0.035   | 0.967                   | 1.461      | 0.089   |
| 15      | 1.000  | 0.009      | 0.000   | 0.983               | 0.823      | 0.034   | 0.968                   | 1.416      | 0.080   |
| 16      | 1.000  | 0.009      | 0.000   | 0.985               | 0.894      | 0.041   | 0.966                   | 1.482      | 0.104   |
| 17      | 1.000  | 0.010      | 0.000   | 0.983               | 0.749      | 0.032   | 0.970                   | 1.265      | 0.074   |
| 18      | 1.000  | 0.010      | 0.000   | 0.986               | 0.653      | 0.024   | 0.960                   | 1.387      | 0.086   |
| 19      | 1.000  | 0.010      | 0.000   | 0.983               | 0.811      | 0.036   | 0.962                   | 1.723      | 0.114   |
| 20      | 1.000  | 0.011      | 0.000   | 0.987               | 0.584      | 0.013   | 0.965                   | 1.299      | 0.072   |
| 21      | 1.000  | 0.010      | 0.000   | 0.985               | 0.665      | 0.017   | 0.950                   | 1.865      | 0.120   |
| 22      | 1.000  | 0.010      | 0.000   | 0.978               | 0.898      | 0.040   | 0.958                   | 1.508      | 0.091   |
| 23      | 1.000  | 0.010      | 0.000   | 0.987               | 0.731      | 0.025   | 0.967                   | 1.526      | 0.091   |
| 24      | 1.000  | 0.011      | 0.000   | 0.981               | 0.698      | 0.030   | 0.964                   | 1.351      | 0.081   |
| 25      | 1.000  | 0.010      | 0.000   | 0.989               | 0.656      | 0.028   | 0.969                   | 1.649      | 0.103   |
| 26      | 1.000  | 0.010      | 0.000   | 0.986               | 0.712      | 0.022   | 0.963                   | 1.360      | 0.089   |
| 27      | 1.000  | 0.010      | 0.000   | 0.983               | 0.669      | 0.022   | 0.958                   | 1.439      | 0.091   |
| 28      | 1.000  | 0.010      | 0.000   | 0.982               | 1.038      | 0.059   | 0.968                   | 1.603      | 0.113   |
| 29      | 1.000  | 0.011      | 0.000   | 0.979               | 0.762      | 0.033   | 0.960                   | 1.621      | 0.102   |
| 30      | 1.000  | 0.011      | 0.000   | 0.982               | 0.732      | 0.028   | 0.963                   | 1.540      | 0.103   |
| 31      | 1.000  | 0.010      | 0.000   | 0.986               | 0.948      | 0.057   | 0.970                   | 1.625      | 0.103   |
| 32      | 1.000  | 0.011      | 0.000   | 0.984               | 0.980      | 0.053   | 0.963                   | 1.582      | 0.104   |
| 33      | 1.000  | 0.011      | 0.000   | 0.984               | 0.912      | 0.047   | 0.961                   | 1.629      | 0.109   |
| 34      | 1.000  | 0.010      | 0.000   | 0.982               | 0.892      | 0.044   | 0.964                   | 1.581      | 0.102   |
| 35      | 1.000  | 0.010      | 0.000   | 0.987               | 0.710      | 0.032   | 0.956                   | 1.704      | 0.135   |
| 36      | 1.000  | 0.010      | 0.000   | 0.977               | 0.939      | 0.051   | 0.961                   | 1.623      | 0.106   |
| 37      | 1.000  | 0.010      | 0.000   | 0.980               | 0.946      | 0.048   | 0.962                   | 1.430      | 0.084   |
| 38      | 1.000  | 0.010      | 0.000   | 0.986               | 0.738      | 0.033   | 0.966                   | 1.791      | 0.110   |
| 39      | 1.000  | 0.010      | 0.000   | 0.985               | 0.862      | 0.044   | 0.941                   | 1.916      | 0.145   |

TABLE S6. The goodness of fit between the predictions of our model and real values for degrees, number of triangles of nodes, and sum of the degrees of neighbors in layer 0 for HCP dataset. The Pearson correlation coefficient  $\rho$ , the  $\chi^2$  test ( $\chi^2 = \sum_i^N (\frac{x_{original} - x_{inferred}}{\sigma})^2$ ), the quantity  $\zeta$  corresponds to the fraction of nodes for which the value measured on the original network lies outside the  $2\sigma$  confidence interval.

| Subject | degree |            |         | number of triangles |            |         | sum degree of neighbors |            |         |
|---------|--------|------------|---------|---------------------|------------|---------|-------------------------|------------|---------|
|         | $\rho$ | $\chi^2/N$ | $\zeta$ | $\rho$              | $\chi^2/N$ | $\zeta$ | $\rho$                  | $\chi^2/N$ | $\zeta$ |
| 0       | 1.000  | 0.010      | 0.000   | 0.987               | 1.396      | 0.079   | 0.983                   | 1.476      | 0.100   |
| 1       | 1.000  | 0.010      | 0.000   | 0.991               | 1.205      | 0.055   | 0.988                   | 1.200      | 0.069   |
| 2       | 1.000  | 0.011      | 0.000   | 0.989               | 1.252      | 0.066   | 0.986                   | 1.232      | 0.067   |
| 3       | 1.000  | 0.011      | 0.000   | 0.991               | 1.232      | 0.071   | 0.988                   | 1.145      | 0.061   |
| 4       | 1.000  | 0.011      | 0.000   | 0.988               | 1.498      | 0.104   | 0.989                   | 1.047      | 0.047   |
| 5       | 1.000  | 0.010      | 0.000   | 0.990               | 1.212      | 0.064   | 0.986                   | 1.158      | 0.066   |
| 6       | 1.000  | 0.010      | 0.000   | 0.991               | 1.105      | 0.049   | 0.987                   | 1.073      | 0.055   |
| 7       | 1.000  | 0.010      | 0.000   | 0.991               | 1.240      | 0.073   | 0.989                   | 1.077      | 0.053   |
| 8       | 1.000  | 0.011      | 0.000   | 0.991               | 1.280      | 0.078   | 0.989                   | 1.152      | 0.052   |
| 9       | 1.000  | 0.010      | 0.000   | 0.989               | 1.217      | 0.071   | 0.987                   | 1.136      | 0.058   |
| 10      | 1.000  | 0.011      | 0.000   | 0.987               | 1.583      | 0.093   | 0.985                   | 1.260      | 0.066   |
| 11      | 1.000  | 0.010      | 0.000   | 0.986               | 1.117      | 0.052   | 0.981                   | 1.341      | 0.084   |
| 12      | 1.000  | 0.010      | 0.000   | 0.988               | 1.368      | 0.085   | 0.984                   | 1.330      | 0.076   |
| 13      | 1.000  | 0.011      | 0.000   | 0.992               | 0.955      | 0.035   | 0.991                   | 0.931      | 0.037   |
| 14      | 1.000  | 0.010      | 0.000   | 0.990               | 1.417      | 0.084   | 0.990                   | 0.934      | 0.038   |
| 15      | 1.000  | 0.010      | 0.000   | 0.990               | 1.103      | 0.060   | 0.983                   | 1.480      | 0.099   |
| 16      | 1.000  | 0.010      | 0.000   | 0.993               | 0.985      | 0.045   | 0.987                   | 1.129      | 0.061   |
| 17      | 1.000  | 0.010      | 0.000   | 0.981               | 1.949      | 0.094   | 0.987                   | 1.265      | 0.074   |
| 18      | 1.000  | 0.010      | 0.000   | 0.988               | 1.479      | 0.107   | 0.988                   | 1.097      | 0.053   |
| 19      | 1.000  | 0.010      | 0.000   | 0.990               | 1.229      | 0.069   | 0.987                   | 1.107      | 0.060   |
| 20      | 1.000  | 0.010      | 0.000   | 0.992               | 1.037      | 0.047   | 0.989                   | 0.991      | 0.040   |
| 21      | 1.000  | 0.010      | 0.000   | 0.992               | 1.156      | 0.061   | 0.988                   | 1.026      | 0.050   |
| 22      | 1.000  | 0.011      | 0.000   | 0.992               | 1.020      | 0.036   | 0.987                   | 1.051      | 0.058   |
| 23      | 1.000  | 0.010      | 0.000   | 0.989               | 1.238      | 0.074   | 0.981                   | 1.425      | 0.084   |
| 24      | 1.000  | 0.011      | 0.000   | 0.989               | 1.189      | 0.072   | 0.981                   | 1.470      | 0.100   |
| 25      | 1.000  | 0.011      | 0.000   | 0.992               | 1.114      | 0.066   | 0.989                   | 0.971      | 0.047   |
| 26      | 1.000  | 0.011      | 0.000   | 0.991               | 1.061      | 0.054   | 0.990                   | 1.016      | 0.046   |
| 27      | 1.000  | 0.010      | 0.000   | 0.987               | 1.294      | 0.076   | 0.984                   | 1.327      | 0.087   |
| 28      | 1.000  | 0.010      | 0.000   | 0.992               | 1.088      | 0.060   | 0.986                   | 1.058      | 0.049   |
| 29      | 1.000  | 0.010      | 0.000   | 0.991               | 1.231      | 0.077   | 0.990                   | 0.834      | 0.030   |
| 30      | 1.000  | 0.010      | 0.000   | 0.990               | 1.063      | 0.058   | 0.988                   | 1.045      | 0.055   |
| 31      | 1.000  | 0.011      | 0.000   | 0.992               | 1.224      | 0.068   | 0.987                   | 1.067      | 0.053   |
| 32      | 1.000  | 0.011      | 0.000   | 0.988               | 1.788      | 0.142   | 0.984                   | 1.437      | 0.095   |
| 33      | 1.000  | 0.010      | 0.000   | 0.991               | 1.176      | 0.057   | 0.983                   | 1.536      | 0.110   |
| 34      | 1.000  | 0.010      | 0.000   | 0.991               | 1.178      | 0.065   | 0.989                   | 0.986      | 0.035   |
| 35      | 1.000  | 0.010      | 0.000   | 0.986               | 1.548      | 0.100   | 0.988                   | 1.122      | 0.053   |
| 36      | 1.000  | 0.010      | 0.000   | 0.990               | 0.998      | 0.047   | 0.988                   | 0.970      | 0.042   |
| 37      | 1.000  | 0.010      | 0.000   | 0.988               | 1.647      | 0.119   | 0.988                   | 1.182      | 0.062   |
| 38      | 1.000  | 0.011      | 0.000   | 0.994               | 0.930      | 0.036   | 0.986                   | 1.204      | 0.060   |
| 39      | 1.000  | 0.010      | 0.000   | 0.991               | 1.144      | 0.060   | 0.986                   | 1.064      | 0.051   |
| 40      | 1.000  | 0.011      | 0.000   | 0.987               | 1.494      | 0.077   | 0.984                   | 1.282      | 0.076   |
| 41      | 1.000  | 0.010      | 0.000   | 0.990               | 1.183      | 0.066   | 0.985                   | 1.172      | 0.065   |
| 42      | 1.000  | 0.010      | 0.000   | 0.991               | 1.008      | 0.046   | 0.988                   | 0.998      | 0.041   |
| 43      | 1.000  | 0.010      | 0.000   | 0.990               | 1.385      | 0.088   | 0.985                   | 1.409      | 0.097   |

- 
- [1] G. García-Pérez, M. Boguñá, and M. Á. Serrano, “Multiscale unfolding of real networks by geometric renormalization,” *Nature Physics* **14**, 583 (2018).
- [2] G. García-Pérez, A. Allard, M. Á. Serrano, and M. Boguñá, “Mercator: uncovering faithful hyperbolic embeddings of complex networks,” *New Journal of Physics* **21**, 123033 (2019).
- [3] Richard F Betzel, Andrea Avena-Koenigsberger, Joaquín Goñi, Ye He, Marcel A De Reus, Alessandra Griffa, Petra E Vértes, Bratislav Mišic, Jean-Philippe Thiran, Patric Hagmann, *et al.*, “Generative models of the human connectome,” *Neuroimage* **124**, 1054–1064 (2016).
